# Supplementary material for: Climate-change-induced range shifts of three allergenic ragweeds (Ambrosia L.) in Europe and their potential impact on human health
Source: PeerJ. 2017 Mar 16;5:e3104. doi: 10.7717/peerj.3104 (PMC5357339; doi:10.7717/peerj.3104)
Supplement: Data S1 [file peerj-05-3104-s007.xlsx]

## Sheet: Native_Climate_Ap
wbal_north	tmin_north	ddeg5_nort
500.429	-38.3864	15736
449.123	-38.0948	16043
439.468	-38.1517	16024
439.468	-38.1517	16024
357.821	-40.3987	12914
368.281	-40.6668	12867
151.191	-43.3445	13681
819.619	0.068786	50589
39.4423	12.1798	78950
-297.707	11.9447	78252
-262.445	-1.64274	48875
98.0573	-4.80924	38667
202.998	-6.43583	33607
-50.8573	-4.0774	41002
202.998	-6.43583	33607
297.313	-5.57028	34994
-190.637	-2.41098	44315
-190.637	-2.41098	44315
202.998	-6.43583	33607
297.313	-5.57028	34994
297.313	-5.57028	34994
-50.8573	-4.0774	41002
297.313	-5.57028	34994
-50.8573	-4.0774	41002
202.998	-6.43583	33607
-176.417	-3.06528	44391
-50.8573	-4.0774	41002
297.313	-5.57028	34994
297.313	-5.57028	34994
335.14	-6.68359	33489
-260.058	-2.90406	44909
-260.058	-2.90406	44909
-260.058	-2.90406	44909
17.8355	-2.91236	41608
335.14	-6.68359	33489
17.8355	-2.91236	41608
522.085	-9.18769	26098
-283.469	-4.53625	39752
-141.045	-5.11919	38516
-265.837	-4.58462	39403
-283.469	-4.53625	39752
49.5725	-7.33893	31723
-286.253	-4.07874	40399
-229.773	-4.55333	39912
-147.125	-4.9392	38253
7.15669	-5.94041	35810
-141.045	-5.11919	38516
7.15669	-5.94041	35810
-265.837	-4.58462	39403
-302.916	-5.2223	38630
49.5725	-7.33893	31723
-265.837	-4.58462	39403
139.349	-6.79093	33503
-265.837	-4.58462	39403
139.349	-6.79093	33503
139.349	-6.79093	33503
-147.125	-4.9392	38253
-140.655	-4.80069	38551
-140.655	-4.80069	38551
522.085	-9.18769	26098
-141.045	-5.11919	38516
-286.156	-4.59689	39739
-141.045	-5.11919	38516
-286.156	-4.59689	39739
128.987	-8.03103	29836
-140.655	-4.80069	38551
-286.156	-4.59689	39739
-141.045	-5.11919	38516
139.349	-6.79093	33503
-147.125	-4.9392	38253
139.349	-6.79093	33503
-255.304	-5.5118	37542
-213.167	-7.2562	32391
-229.943	-6.00268	34147
-255.304	-5.5118	37542
-213.167	-7.2562	32391
-227.098	-5.29813	37542
8.18047	-5.54609	36324
218.825	-7.92511	29307
-227.098	-5.29813	37542
-227.098	-5.29813	37542
218.825	-7.92511	29307
-95.9709	-5.921	35084
-213.167	-7.2562	32391
-227.098	-5.29813	37542
-255.304	-5.5118	37542
235.628	-7.82856	29507
-213.167	-7.2562	32391
-131.006	-4.78219	38072
-140.655	-4.80069	38551
8.18047	-5.54609	36324
-289.248	-5.73124	37068
-213.167	-7.2562	32391
-255.304	-5.5118	37542
242.607	-8.22441	28679
218.825	-7.92511	29307
-255.304	-5.5118	37542
5.99764	-6.16148	34361
-227.098	-5.29813	37542
-140.655	-4.80069	38551
-95.9709	-5.921	35084
8.18047	-5.54609	36324
-227.098	-5.29813	37542
8.18047	-5.54609	36324
258.093	-8.74386	27288
-140.655	-4.80069	38551
218.825	-7.92511	29307
-227.098	-5.29813	37542
258.093	-8.74386	27288
553.668	3.2566	64281
0	0	0
0	0	0
553.668	3.2566	64281
-393.865	10.873	76913
0	0	0
-393.865	10.873	76913
-337.104	10.2802	76231
-337.104	10.2802	76231
0	0	0
0	0	0
0	0	0
0	0	0
-393.865	10.873	76913
-337.104	10.2802	76231
-434.018	11.2238	76703
-337.104	10.2802	76231
-393.865	10.873	76913
0	0	0
-264.098	1.18524	55951
-264.098	1.18524	55951
-315.821	-1.30039	49828
-315.821	-1.30039	49828
-515.019	-2.01671	48285
-325.651	-2.33881	46804
-316.819	-3.31859	42921
-534.042	-1.99198	48687
-316.819	-3.31859	42921
-316.819	-3.31859	42921
-325.651	-2.33881	46804
-534.042	-1.99198	48687
-478.988	-2.01865	47743
-316.819	-3.31859	42921
-325.651	-2.33881	46804
-515.019	-2.01671	48285
-478.988	-2.01865	47743
-224.859	-5.19615	37399
-188.116	-5.59917	35434
-188.116	-5.59917	35434
-802.61	12.3641	79495
-510.043	11.6176	79051
-147.199	11.861	76224
-135.105	11.8477	76137
-147.199	11.861	76224
-160.324	11.6512	75861
-160.324	11.6512	75861
0	0	0
-337.6	-3.27572	43960
-486.1	-4.83167	41814
-499.032	-3.87265	45603
-499.032	-3.87265	45603
-550.775	-3.66131	44327
-468.253	-3.44182	44896
-495.434	-3.70249	44610
-468.253	-3.44182	44896
-495.434	-3.70249	44610
-550.775	-3.66131	44327
-953.651	11.4716	76481
-606.365	11.1348	76440
-606.365	11.1348	76440
-606.365	11.1348	76440
-234.665	10.2722	73837
-152.272	11.0459	74816
-152.272	11.0459	74816
-152.272	11.0459	74816
-152.272	11.0459	74816
-152.272	11.0459	74816
-152.272	11.0459	74816
-508.018	-0.550766	56522
-357.208	-5.69029	42180
-677.572	-2.54432	46639
-529.15	-4.46545	42531
-380.077	-7.28633	40536
-551.36	-5.69672	45147
-551.36	-5.69672	45147
-574.241	-5.46429	45812
-404.436	-6.94481	41627
-297.791	-8.17013	38370
-388.302	-7.0179	41510
-626.339	-4.32728	43725
-583.378	-5.67482	45717
-570.38	-5.80095	45840
-444.875	-7.36123	40621
-474.857	-7.11913	41493
-474.857	-7.11913	41493
-579.193	-5.61654	45831
-578.586	-5.96202	44707
-583.378	-5.67482	45717
-578.586	-5.96202	44707
-474.857	-7.11913	41493
-512.175	-7.0679	41608
-684.053	-4.45907	46129
-543.602	-3.97357	44535
-543.602	-3.97357	44535
-543.602	-3.97357	44535
-543.602	-3.97357	44535
-759.959	1.71971	69622
-759.959	1.71971	69622
-1079.5	1.3915	62859
-431.148	-7.4413	41086
-431.148	-7.4413	41086
-765.838	-5.80124	51492
-1041.84	-3.58572	58002
-1014.58	-3.55707	58159
-1014.58	-3.55707	58159
-1014.58	-3.55707	58159
-765.838	-5.80124	51492
-1014.58	-3.55707	58159
-765.838	-5.80124	51492
-1041.84	-3.58572	58002
-739.536	-6.59072	49840
-739.536	-6.59072	49840
-543.901	-3.539	54701
-543.901	-3.539	54701
-658.243	-5.02191	50272
-756.103	-6.22903	48802
-756.103	-6.22903	48802
-563.205	-4.74602	47813
-741.096	-1.22307	66141
-741.096	-1.22307	66141
-720.579	-1.11506	65893
-959.35	-5.8442	55562
-1136.55	2.13374	70145
-1136.55	2.13374	70145
-1136.55	2.13374	70145
-335.575	-3.78826	53043
-335.575	-3.78826	53043
-335.575	-3.78826	53043
-249	-5.53425	49299
189.681	-13.1634	29526
189.681	-13.1634	29526
189.681	-13.1634	29526
-249	-5.53425	49299
189.681	-13.1634	29526
189.681	-13.1634	29526
189.681	-13.1634	29526
189.681	-13.1634	29526
-249	-5.53425	49299
-160.604	-8.19631	43928
-160.604	-8.19631	43928
-160.604	-8.19631	43928
189.681	-13.1634	29526
189.681	-13.1634	29526
189.681	-13.1634	29526
-249	-5.53425	49299
189.681	-13.1634	29526
189.681	-13.1634	29526
189.681	-13.1634	29526
189.681	-13.1634	29526
-58.1041	-15.5178	25160
-58.1041	-15.5178	25160
-238.261	-14.3876	29673
-238.261	-14.3876	29673
-684.728	-9.27635	45563
-684.728	-9.27635	45563
-684.728	-9.27635	45563
-684.728	-9.27635	45563
-684.728	-9.27635	45563
-742.668	-8.85992	47298
-742.668	-8.85992	47298
-174.676	-15.2593	27566
-174.676	-15.2593	27566
-437.973	-11.7365	39687
-437.973	-11.7365	39687
-437.973	-11.7365	39687
-390.098	-12.7023	37319
-390.098	-12.7023	37319
-390.098	-12.7023	37319
-266.712	-14.6342	31460
-266.712	-14.6342	31460
-202.174	-14.7764	30190
-202.174	-14.7764	30190
-624.344	-6.83782	38702
-624.344	-6.83782	38702
-361.388	-13.3591	34724
-511.883	-14.0827	37098
-604.713	-7.56443	38946
0	0	0
-601.434	-7.59598	40468
-601.434	-7.59598	40468
-604.713	-7.56443	38946
-449.521	-12.6367	31949
-449.521	-12.6367	31949
-840.94	-3.92583	64935
-840.94	-3.92583	64935
-803.372	-3.04225	64991
-808.764	-1.11677	67431
-685.87	-0.703308	66602
-699.755	-1.22373	66380
-682.673	-2.07113	65308
-9.77052	3.46213	66440
-806.902	-5.19707	62623
-720.908	-2.95152	64394
-655.233	-4.98828	61323
-608.545	-4.43147	62337
-562.888	-3.79455	62702
-631.191	-3.44833	63563
-752.124	-6.12353	62199
-570.182	-5.90045	60224
-389.056	-6.29674	58393
-467.803	-5.98995	59144
-439.61	-7.28286	57352
-524.896	-4.27676	62032
-277.353	-4.80662	59837
125.491	-3.06337	59102
0	0	0
-604.556	-12.013	43356
-742.176	-10.5479	49933
-729.53	-9.65992	54337
-267.167	-10.8702	49823
-274.465	-10.2055	52050
-463.362	-7.97578	56706
-461.352	-8.94575	55205
-314.765	-8.19119	55901
-154.174	-6.71221	56868
-185.917	-6.98202	57174
-264.212	-7.76215	56666
-120.383	-5.82014	57868
-42.9158	-7.15402	55529
206.357	-7.07668	56085
232.385	-7.4205	54980
318.314	-7.16935	55058
415.75	-6.79414	55158
371.036	-6.0142	56439
368.978	-5.80851	56367
356.812	-6.27866	56597
184.399	-5.54976	56082
170.576	-4.97796	56365
-374.949	-14.8146	34223
-705.638	-11.9697	48391
-542.935	-12.5839	48016
-449.204	-11.9901	49263
-452.031	-10.3255	50884
-263.923	-11.3119	49932
-270.559	-12.3479	48225
-387.094	-11.9244	49739
-263.019	-10.2998	52035
-354.019	-9.82347	54162
-335.748	-9.01372	55359
-354.019	-9.82347	54162
-307.623	-10.7012	52600
-354.019	-9.82347	54162
-160.021	-9.27617	54085
-169.868	-8.25325	56610
-278.836	-10.0217	53794
-89.8204	-10.062	52600
70.6775	-9.5869	52377
173.658	-9.44023	52593
250.421	-9.20708	52600
228.016	-8.03714	54308
320.384	-9.26495	52582
388.546	-9.44023	52326
333.397	-8.22034	53855
333.937	-7.62461	54481
436.888	-8.46629	53506
434.104	-7.5597	54473
483.575	-8.96506	52342
449.185	-8.8565	52348
386.189	-7.02979	55092
431.904	-8.41813	51407
402.259	-8.34144	51287
325.501	-8.07299	52353
281.714	-8.58302	51939
263.711	-8.81968	51825
394.075	-6.91406	54257
165.456	-6.38979	55222
177.64	-5.95637	55506
-569.715	-9.98507	44702
-569.715	-9.98507	44702
-376.32	-13.0101	35524
-447.364	-12.8879	36959
-668.749	-11.4121	43455
-475.195	-12.7108	37792
-401.312	-13.6142	34779
-678.528	-11.1235	44069
-401.312	-13.6142	34779
-413.036	-12.7331	36949
-668.749	-11.4121	43455
-668.749	-11.4121	43455
-410.406	-13.306	35550
-543.102	-12.1212	39938
-633.509	-12.4118	41429
-579.597	-12.6064	39941
-475.285	-14.7801	35097
-399.109	-15.9275	31666
-475.145	-15.2768	34243
-445.953	-15.3912	33477
-475.145	-15.2768	34243
-581.635	-14.8206	37273
-445.953	-15.3912	33477
-408.233	-12.9835	47641
-369.948	-13.5302	47229
-292.28	-13.6135	46470
-348.719	-13.5266	47327
-284.469	-13.7931	46909
-281.268	-13.4953	47563
-278.243	-13.3833	46565
-269.875	-12.8595	50084
-283.098	-12.7911	49073
-323.04	-11.9665	51864
-182.271	-10.5148	52535
-69.7754	-12.1245	49737
-26.8803	-12.4765	48688
-14.1567	-10.6523	51089
248.986	-10.2609	50908
168.592	-11.1764	49777
185.33	-11.4281	49647
312.874	-10.246	51289
297.153	-11.0627	49901
264.151	-10.971	50181
237.7	-11.7607	48788
371.505	-10.1129	51073
-218.22	-12.366	31442
-839.728	-7.08756	55361
-862.25	-7.11007	55042
-518.664	-14.3822	36022
-540.904	-14.0664	37430
-438.746	-15.5237	33099
-340.759	-17.8989	28170
-672.382	-15.4765	38041
-651.782	-15.3106	37869
-552.364	-14.8736	38879
-641.458	-14.4731	42043
-514.646	-15.667	38757
-585.821	-14.7399	40859
-597.652	-14.2553	43720
-528.945	-15.0969	42787
-461.188	-14.448	46148
-417.564	-14.4291	45084
-418.053	-14.1561	46868
-410.048	-14.0314	46614
-340.023	-14.1173	46221
-274.592	-14.1024	46236
-301.683	-14.0138	47476
-297.812	-14.1867	46535
-287.684	-13.2622	49684
-270.247	-13.3761	49070
-214.581	-14.771	45996
-217.952	-12.782	50635
-213.61	-12.8653	49922
-84.7873	-13.4267	48298
86.386	-12.8512	47276
151.925	-13.5115	46033
181.713	-13.2146	46287
121.911	-11.9331	48596
150.685	-12.0723	48393
191.236	-12.6268	47408
144.208	-13.017	46733
124.923	-12.7062	47542
263.859	-12.6972	47517
266.366	-12.6897	47143
223.433	-13.5536	45724
289.003	-11.781	48225
286.906	-12.514	47780
273.892	-12.3442	47898
314.424	-13.2971	46581
351.93	-12.857	46402
346.872	-13.1908	45868
346.872	-13.1908	45868
338.573	-12.7282	46558
288.353	-11.7584	48024
340.01	-12.7699	46279
-618.652	-4.98982	44357
-647.016	-4.85583	42705
-644.819	-5.03535	41797
-666.486	-5.39496	43644
-666.486	-5.39496	43644
-666.486	-5.39496	43644
-666.486	-5.39496	43644
-666.486	-5.39496	43644
-666.486	-5.39496	43644
-666.486	-5.39496	43644
-666.486	-5.39496	43644
-666.486	-5.39496	43644
-666.486	-5.39496	43644
-666.486	-5.39496	43644
-666.486	-5.39496	43644
-666.486	-5.39496	43644
-666.486	-5.39496	43644
-666.486	-5.39496	43644
-666.486	-5.39496	43644
-666.486	-5.39496	43644
-666.486	-5.39496	43644
-666.486	-5.39496	43644
-666.486	-5.39496	43644
-666.486	-5.39496	43644
-666.486	-5.39496	43644
-666.486	-5.39496	43644
-666.486	-5.39496	43644
-666.486	-5.39496	43644
-666.486	-5.39496	43644
-666.486	-5.39496	43644
-666.486	-5.39496	43644
-666.486	-5.39496	43644
-666.486	-5.39496	43644
-666.486	-5.39496	43644
-666.486	-5.39496	43644
-666.486	-5.39496	43644
-666.486	-5.39496	43644
-666.486	-5.39496	43644
-666.486	-5.39496	43644
-666.486	-5.39496	43644
-666.486	-5.39496	43644
-666.486	-5.39496	43644
-666.486	-5.39496	43644
-666.486	-5.39496	43644
-666.486	-5.39496	43644
-666.486	-5.39496	43644
-666.486	-5.39496	43644
-666.486	-5.39496	43644
-666.486	-5.39496	43644
-666.486	-5.39496	43644
-666.486	-5.39496	43644
-666.486	-5.39496	43644
-666.486	-5.39496	43644
-666.486	-5.39496	43644
-666.486	-5.39496	43644
-666.486	-5.39496	43644
-666.486	-5.39496	43644
-666.486	-5.39496	43644
-666.486	-5.39496	43644
-666.486	-5.39496	43644
-666.486	-5.39496	43644
-666.486	-5.39496	43644
-666.486	-5.39496	43644
-666.486	-5.39496	43644
-666.486	-5.39496	43644
-666.486	-5.39496	43644
-666.486	-5.39496	43644
-666.486	-5.39496	43644
-666.486	-5.39496	43644
-666.486	-5.39496	43644
-666.486	-5.39496	43644
-666.486	-5.39496	43644
-666.486	-5.39496	43644
-666.486	-5.39496	43644
-666.486	-5.39496	43644
-666.486	-5.39496	43644
-666.486	-5.39496	43644
-666.486	-5.39496	43644
-666.486	-5.39496	43644
-666.486	-5.39496	43644
-666.486	-5.39496	43644
-666.486	-5.39496	43644
-666.486	-5.39496	43644
-666.486	-5.39496	43644
-666.486	-5.39496	43644
-666.486	-5.39496	43644
-666.486	-5.39496	43644
-666.486	-5.39496	43644
-666.486	-5.39496	43644
-666.486	-5.39496	43644
-666.486	-5.39496	43644
-666.486	-5.39496	43644
-666.486	-5.39496	43644
-666.486	-5.39496	43644
-666.486	-5.39496	43644
-666.486	-5.39496	43644
-666.486	-5.39496	43644
-666.486	-5.39496	43644
-666.486	-5.39496	43644
-666.486	-5.39496	43644
-666.486	-5.39496	43644
-666.486	-5.39496	43644
-666.486	-5.39496	43644
-666.486	-5.39496	43644
-666.486	-5.39496	43644
-666.486	-5.39496	43644
-666.486	-5.39496	43644
-666.486	-5.39496	43644
-666.486	-5.39496	43644
-666.486	-5.39496	43644
-666.486	-5.39496	43644
-666.486	-5.39496	43644
-666.486	-5.39496	43644
-666.486	-5.39496	43644
-666.486	-5.39496	43644
-666.486	-5.39496	43644
-666.486	-5.39496	43644
-666.486	-5.39496	43644
-666.486	-5.39496	43644
-666.486	-5.39496	43644
-666.486	-5.39496	43644
-666.486	-5.39496	43644
-666.486	-5.39496	43644
-666.486	-5.39496	43644
-666.486	-5.39496	43644
-666.486	-5.39496	43644
-666.486	-5.39496	43644
-666.486	-5.39496	43644
-666.486	-5.39496	43644
-666.486	-5.39496	43644
-666.486	-5.39496	43644
-666.486	-5.39496	43644
-666.486	-5.39496	43644
-666.486	-5.39496	43644
-666.486	-5.39496	43644
-666.486	-5.39496	43644
-666.486	-5.39496	43644
-666.486	-5.39496	43644
-666.486	-5.39496	43644
-666.486	-5.39496	43644
-666.486	-5.39496	43644
-666.486	-5.39496	43644
-666.486	-5.39496	43644
-666.486	-5.39496	43644
-666.486	-5.39496	43644
-666.486	-5.39496	43644
-666.486	-5.39496	43644
-666.486	-5.39496	43644
-666.486	-5.39496	43644
-666.486	-5.39496	43644
-666.486	-5.39496	43644
-666.486	-5.39496	43644
-666.486	-5.39496	43644
-666.486	-5.39496	43644
-666.486	-5.39496	43644
-666.486	-5.39496	43644
-413.449	-10.4159	35599
-666.486	-5.39496	43644
-1088.82	-6.19901	56349
-1088.82	-6.19901	56349
-1088.82	-6.19901	56349
-1088.82	-6.19901	56349
-1088.82	-6.19901	56349
-1088.82	-6.19901	56349
-1088.82	-6.19901	56349
-1088.82	-6.19901	56349
-926.196	-8.90514	51749
-1088.82	-6.19901	56349
-1088.82	-6.19901	56349
-1088.82	-6.19901	56349
-1087.2	-6.24352	61027
-303.283	-15.8164	34478
-460.129	-13.4727	41017
-222.292	-18.2179	27469
-389.369	-15.0929	37215
282.37	-26.1822	9470
-227.356	-18.3072	26031
-198.563	-18.5393	26171
-227.356	-18.3072	26031
-168.189	-19.9794	22712
-168.189	-19.9794	22712
-168.189	-19.9794	22712
-674.466	-15.856	38257
-650.909	-16.9226	36323
-639.965	-16.0929	40438
-460.531	-16.718	38712
-405.718	-16.778	39544
-509.366	-15.3847	43438
-444.477	-16.7555	39278
-439.867	-14.8607	45460
-435.307	-15.7726	44123
-435.402	-16.1255	42114
-298.11	-16.1565	44511
-286.108	-14.7247	46166
-286.416	-15.4513	45507
-183.976	-14.8451	46009
-179.327	-13.994	47922
-69.2038	-14.9428	45655
117.078	-15.9038	43597
45.1238	-14.9155	45088
113.01	-15.1309	44422
289.637	-15.1383	44121
316.566	-14.1713	45422
311.87	-14.9487	44175
264.457	-11.6288	46799
-565.668	-5.35885	40510
-687.411	-3.20702	46602
-542.99	-5.57411	39301
-542.99	-5.57411	39301
-687.411	-3.20702	46602
-542.99	-5.57411	39301
-692.97	-2.68978	48316
-675.348	-3.79501	46952
-675.348	-3.79501	46952
-675.348	-3.79501	46952
-675.348	-3.79501	46952
-675.348	-3.79501	46952
-675.348	-3.79501	46952
-675.348	-3.79501	46952
-675.348	-3.79501	46952
-675.348	-3.79501	46952
-675.348	-3.79501	46952
-675.348	-3.79501	46952
-675.348	-3.79501	46952
-675.348	-3.79501	46952
-675.348	-3.79501	46952
-675.348	-3.79501	46952
-676.415	-5.83435	45918
-675.348	-3.79501	46952
-675.348	-3.79501	46952
-675.348	-3.79501	46952
-675.348	-3.79501	46952
-675.348	-3.79501	46952
-480.486	-9.90001	39512
-480.486	-9.90001	39512
-480.486	-9.90001	39512
-480.486	-9.90001	39512
-480.486	-9.90001	39512
-480.486	-9.90001	39512
-480.486	-9.90001	39512
-480.486	-9.90001	39512
-480.486	-9.90001	39512
-480.486	-9.90001	39512
-480.486	-9.90001	39512
-480.486	-9.90001	39512
-480.486	-9.90001	39512
-480.486	-9.90001	39512
-480.486	-9.90001	39512
-480.486	-9.90001	39512
-480.486	-9.90001	39512
-480.486	-9.90001	39512
-480.486	-9.90001	39512
-480.486	-9.90001	39512
-480.486	-9.90001	39512
-480.486	-9.90001	39512
-480.486	-9.90001	39512
-480.486	-9.90001	39512
-714.797	-11.3472	44585
-383.161	-16.1121	32140
-237.278	-18.2105	27407
-257.288	-18.0367	27713
-108.111	-20.6071	24147
-263.659	-16.0184	33540
-110.604	-18.9057	26846
-173.106	-22.1418	21382
-161.77	-19.8317	25518
-95.4753	-21.5762	20135
-171.03	-24.7176	18627
-459.58	-19.8536	29207
-425.337	-18.1162	31658
-407.193	-18.5033	30478
-455.111	-17.6049	33348
-412.253	-18.0208	33610
-418.187	-17.6631	34739
-395.643	-18.6001	33435
-417.923	-17.6317	36706
-381.217	-18.5312	34430
-349.366	-19.0107	33604
-422.186	-17.7653	35693
-345.289	-18.8118	36158
-355.206	-17.7644	37570
-341.141	-19.12	34589
-391.652	-17.876	38371
-340.231	-18.5192	37824
-455.322	-17.1887	41162
-443.465	-17.1826	41721
-444.622	-16.7039	41300
-341.967	-18.3733	39185
-439.186	-16.6782	42690
-319.238	-17.7436	42289
-325.998	-18.1643	40682
-328.748	-16.7843	43733
-244.723	-17.6855	41787
-97.4416	-18.0332	41195
-245.185	-17.154	42377
-12.9592	-15.8185	44119
181.842	-15.7055	43226
293.411	-16.6577	42449
324.822	-16.4587	42281
499.588	-17.0291	38747
254.812	-15.6265	39350
313.636	-16.0889	38260
-353.5	-11.1825	31762
-715.017	-10.9036	42336
-715.017	-10.9036	42336
-846.345	-13.8508	41579
-951.536	-12.2258	47295
148.264	-25.6496	14330
148.264	-25.6496	14330
148.264	-25.6496	14330
-120.427	-23.7668	19216
-355.849	-24.0364	24535
-312.049	-24.323	22995
-170.828	-25.8748	18587
-81.0055	-25.9594	16168
-519.656	-20.4099	31511
-290.661	-22.108	25494
-108.29	-24.0868	20550
-503.525	-20.473	31319
-290.661	-22.108	25494
-217.421	-22.4731	22638
-294.184	-20.8618	25375
-275.955	-21.4344	23895
-150.224	-22.8346	21100
-195.949	-22.268	23205
-349.132	-21.0338	29530
-463.88	-18.4089	35465
-357.769	-20.7875	30055
-386.751	-20.2678	31534
-342.128	-20.3538	32274
-370.093	-19.3413	33786
-357.557	-19.3865	34626
-311.504	-20.2917	32695
-321.68	-20.064	34281
-294.762	-19.9085	34042
-357.557	-19.3865	34626
-273.052	-19.7732	35370
-276.694	-20.3504	35970
-281.641	-20.2636	34959
-264.868	-19.6394	36559
-230.784	-20.0832	36597
-224.593	-19.936	36745
-225.406	-19.7618	38219
-230.784	-20.0832	36597
-230.784	-20.0832	36597
-224.593	-19.936	36745
-230.784	-20.0832	36597
-214.778	-20.433	37018
-185.162	-19.1531	39540
-81.0159	-18.6315	40384
-151.984	-19.6824	39798
-81.803	-19.1589	39933
-144.764	-19.29	39523
-164.574	-18.2097	41053
50.0848	-19.4952	39615
-0.473814	-18.7782	39976
132.477	-19.0679	39715
146.983	-18.7017	40170
251.914	-18.1149	39974
270.397	-19.3283	37289
243.615	-18.688	38501
301.06	-16.2619	38223
-154.177	-11.0407	30912
-373.23	-10.9256	32012
-691.375	-11.7525	43960
-723.145	-11.7612	44461
-776.209	-11.898	45397
-776.209	-11.898	45397
-402.586	-24.9665	25958
-50.8836	-27.993	17410
116.468	-28.2775	13763
67.2724	-28.356	15049
-154.34	-23.7655	21667
-76.4007	-24.4646	18841
-174.59	-23.6038	22449
-279.941	-21.8479	26982
-280.802	-21.6187	26883
-293.466	-21.3755	27731
-291.538	-21.6635	28560
-289.368	-21.6021	27773
-310.096	-21.0385	28272
-261.975	-22.0441	25955
-313.869	-20.968	28815
-300.9	-21.2511	28452
-299.521	-21.297	27639
-296.789	-22.2218	28312
-313.869	-20.968	28815
-276.362	-22.499	26318
-304.228	-21.2275	30286
-292.444	-21.7863	29939
-328.451	-20.736	33303
-307.532	-21.125	31814
-348.262	-21.2735	32846
-301.096	-21.0263	35394
-293.712	-21.7515	34792
-296.554	-20.8914	34293
-195.121	-21.4369	36567
-308.867	-20.6946	37000
-220.208	-21.3449	36512
-78.5185	-21.9494	37630
-159.204	-21.6898	36598
-29.4512	-20.9872	38809
-54.2633	-19.4987	40274
-72.977	-21.4286	37758
-40.3196	-19.5045	40251
84.2216	-20.7216	38256
91.3834	-19.5212	40031
181.628	-19.8771	38234
355.079	-20.9363	36329
-17.3956	-10.6413	29629
-393.007	-10.7286	34843
-280.563	-11.5611	34130
-350.446	-22.0247	26852
-196.156	-27.2001	21354
-329.437	-22.9324	26441
-313.736	-24.8098	29394
-315.75	-23.3774	29180
-308.639	-23.3193	30513
-308.639	-23.3193	30513
-310.835	-22.3407	31444
-319.249	-22.1589	31968
-306.794	-22.4589	31190
-303.964	-21.4153	33982
-305.17	-22.4045	33014
-280.644	-23.7955	30728
-304.757	-22.2318	31278
-306.794	-22.4589	31190
-302.042	-23.2013	31990
-323.654	-21.7941	32950
-318.578	-22.4901	32330
-285.553	-24.498	29636
-311.812	-23.3163	30996
-299.226	-23.5632	31321
-313.795	-22.7174	32365
-295.675	-23.9446	30541
-295.002	-24.2669	30035
-309.668	-22.1501	31498
-325.412	-21.8421	32356
-295.002	-24.2669	30035
-301.863	-22.0004	31206
-241.249	-23.6651	32506
-296.711	-21.4409	34175
-303.659	-21.7037	33786
-246.173	-23.463	32768
-234.269	-23.0304	33356
-277.508	-22.1649	34204
-284.88	-22.7489	32841
-273.661	-22.2601	34260
-252.636	-23.4619	32696
-277.508	-22.1649	34204
-259.999	-23.6942	32256
-267.019	-22.4864	33949
-262.802	-22.5679	34005
-179.288	-23.7281	33438
-169.736	-22.2391	35450
-159.661	-23.0122	34474
-177.104	-23.1305	34068
-180.409	-22.2087	35468
-188.899	-23.9029	33235
-158.762	-23.4286	33898
-188.899	-23.9029	33235
-230.251	-22.792	34077
-236.501	-22.7625	33918
-217.615	-23.3101	33300
-89.0306	-22.4616	36101
-139.981	-23.0067	34599
-91.693	-23.359	34802
-151.86	-22.4647	35374
-92.0316	-23.4619	34681
-106.061	-23.2147	34651
-140.663	-23.1819	34346
-82.5814	-23.7432	34560
-117.931	-23.1336	34670
-121.659	-23.5978	33904
-120.494	-23.4122	34160
-62.2913	-23.6508	34939
-47.7084	-22.4446	36621
-52.8095	-23.4403	35289
-10.1164	-21.6077	37782
-81.0226	-22.8012	35803
26.9932	-23.2966	35248
68.7245	-23.2739	35050
73.9815	-22.1568	36436
56.709	-22.3788	36348
121.131	-23.9568	34173
69.6527	-23.5037	34821
155.408	-23.2922	34869
155.751	-22.733	35415
155.425	-23.8533	34314
68.7245	-23.2739	35050
143.58	-24.0836	34100
133.227	-22.3614	35999
136.363	-24.0836	34117
117.959	-22.9546	35221
202.051	-22.1225	36134
176.685	-23.7197	34484
194.707	-22.229	36026
182.276	-23.3713	34888
193.11	-22.6514	35597
163.688	-24.1389	34046
190.686	-24.0169	34255
220.251	-22.2595	35716
172.61	-23.6579	34597
193.11	-22.6514	35597
209.363	-22.7834	35386
200.443	-23.4055	34788
293.668	-22.0394	34513
263.372	-22.3477	34942
230.509	-24.0093	34933
287.785	-23.3871	34434
322.611	-23.4806	33803
247.591	-23.5122	34740
248.359	-22.2806	35235
280.717	-21.934	34735
287.759	-24.0341	33475
263.419	-23.6304	33223
298.756	-23.7497	32885
372.858	-23.3708	32205
331.93	-23.6699	32166
328.155	-23.7502	31601
359.93	-21.5274	36508
366.064	-22.9699	33833
51.6067	-12.2489	32601
233.274	-10.5952	34222
0	0	0
0	0	0
0	0	0
-448.596	-11.706	38791
-253.347	-11.9861	36810
0	0	0
-360.846	-12.1138	39224
0	0	0
0	0	0
0	0	0
0	0	0
-355.268	-11.5307	37671
-475.96	-12.1783	39357
0	0	0
-481.885	-12.2422	39114
456.39	-19.2287	20140
-250.931	-23.9092	19765
143.712	-30.4117	9376
-81.8445	-25.3712	19043
-150.288	-24.8271	21463
-383.069	-23.4094	28143
17.6093	-26.9185	14532
-188.329	-23.843	22790
-252.161	-25.8422	24579
-276.517	-25.8623	25638
-272.074	-25.8623	25636
-364.476	-24.9421	27720
-360.411	-25.3198	28195
-280.645	-25.7774	25503
-254.234	-25.9535	25157
-301.19	-25.5397	27939
-288.75	-25.6718	27362
-253.599	-25.5748	25877
-278.041	-25.801	26211
-278.041	-25.801	26211
-278.865	-25.6023	27144
-184.283	-24.7014	28426
-225.239	-24.6777	27256
-229.149	-24.5271	28906
-245.491	-24.7265	28406
-229.149	-24.5271	28906
-248.711	-24.8066	28192
-192.05	-24.6286	28280
-220.615	-24.5974	27534
-184.283	-24.7014	28426
-248.711	-24.8066	28192
-191.429	-24.5715	30502
-151.666	-24.9268	29493
-144.591	-25.0596	29902
-245.633	-24.1456	31390
-230.267	-24.0013	32280
-184.905	-24.6873	29456
-176.895	-24.7662	28964
-176.895	-24.7662	28964
-191.429	-24.5715	30502
-237.336	-24.0589	31697
-171.827	-24.7662	29129
-173.469	-24.7662	29199
-163.367	-24.3427	32744
-136.241	-24.9578	31994
-182.106	-24.366	32571
-142.323	-25.8118	30770
-231.206	-23.8031	32812
-141.091	-25.2527	30211
-203.951	-24.4338	31879
-159.558	-24.9578	31852
-153.881	-25.3845	31349
-140.894	-24.8043	32202
-103.544	-24.0009	33830
-82.7715	-24.1096	34023
-70.5601	-24.133	34061
-92.7801	-24.0198	33903
-87.1573	-25.3221	31549
-64.3462	-24.9572	32649
-53.8214	-24.6913	33546
-75.8737	-25.2422	31720
-125.041	-24.5667	32685
-53.3798	-24.4571	33927
-107.648	-24.1683	33555
-118.825	-24.079	33495
-109.797	-24.5824	32748
-42.9308	-23.7487	34834
-30.9761	-23.8105	34808
-47.7753	-24.3767	34104
-68.0882	-23.8172	34517
-33.057	-23.9322	34581
25.0603	-24.1097	34398
-61.378	-23.7775	34622
-42.9308	-23.7487	34834
-31.3685	-24.37	34278
-6.86117	-24.1136	34463
-47.7753	-24.3767	34104
-47.7753	-24.3767	34104
-45.4294	-24.7848	33685
-34.6717	-24.5247	34053
-21.8146	-24.362	34351
32.7314	-24.7322	33902
122.36	-25.4235	32524
106.524	-25.0362	33134
90.9188	-25.1778	33179
109.691	-24.5753	33474
135.319	-25.4474	32583
106.508	-25.1391	32913
94.6992	-24.7224	33507
146.158	-25.5349	32299
159.143	-26.0951	31486
94.6992	-24.7224	33507
52.441	-24.0978	34261
160.204	-24.7065	33342
195.985	-24.1994	34142
195.446	-24.2348	34280
122.93	-25.7697	31930
195.446	-24.2348	34280
175.468	-24.5486	33619
139.467	-25.2289	32848
147.17	-25.148	32793
191.775	-24.2672	34007
195.025	-24.1886	34151
131.593	-25.3179	32574
250.07	-24.3731	33707
220.606	-24.4481	33528
215.496	-24.2494	34431
239.695	-24.6111	33298
247.217	-24.2124	34521
215.247	-24.4733	33490
209.376	-24.283	33985
294.659	-24.1712	32958
253.689	-25.0238	32904
262.557	-25.5957	31325
248.079	-25.993	30735
190.62	-24.7852	32741
164.098	-24.0382	33897
199.406	-24.0515	33126
230.257	-24.5956	32380
398.803	-24.4191	31890
465.327	-13.2642	23978
317.627	-13.1055	28115
-414.832	-11.8631	39800
317.627	-13.1055	28115
4.84085	-13.9076	30349
-334.48	-12.6206	37171
4.84085	-13.9076	30349
-426.341	-11.987	39821
317.627	-13.1055	28115
-374.451	-11.9101	39759
-374.451	-11.9101	39759
-374.451	-11.9101	39759
-374.451	-11.9101	39759
-374.451	-11.9101	39759
-374.451	-11.9101	39759
794.475	-20.4328	17471
-374.451	-11.9101	39759
-374.451	-11.9101	39759
-51.2807	-13.0788	38790
-374.451	-11.9101	39759
-374.451	-11.9101	39759
-374.451	-11.9101	39759
-374.451	-11.9101	39759
-374.451	-11.9101	39759
649.354	-15.9059	27409
73.6598	-13.8283	36547
-169.604	-12.652	39845
429.441	-14.3013	32110
-374.451	-11.9101	39759
-366.941	-12.0567	40760
-169.604	-12.652	39845
-374.451	-11.9101	39759
-374.451	-11.9101	39759
-169.604	-12.652	39845
-374.451	-11.9101	39759
-374.451	-11.9101	39759
209.572	-12.9973	34594
209.572	-12.9973	34594
209.572	-12.9973	34594
209.572	-12.9973	34594
209.572	-12.9973	34594
209.572	-12.9973	34594
209.572	-12.9973	34594
209.572	-12.9973	34594
209.572	-12.9973	34594
209.572	-12.9973	34594
209.572	-12.9973	34594
209.572	-12.9973	34594
209.572	-12.9973	34594
-404.403	-26.5134	24431
-338.54	-26.776	23583
-419.749	-27.3003	27134
46.5148	-27.3488	14616
-112.474	-24.0964	20408
-23.9788	-25.0912	17206
24.0755	-26.3916	14653
-193.902	-25.3366	22925
-69.1528	-24.8404	18557
-159.259	-24.0841	22299
-209.328	-26.1098	23125
-206.529	-26.3968	24111
-231.156	-26.0695	24533
-235.387	-25.755	25356
-236.694	-25.7236	25268
-229.608	-25.4343	25920
-235.387	-25.755	25356
-153.141	-24.9001	27673
-206.013	-24.6761	26941
-157.204	-25.0997	27367
-192.255	-24.6371	26477
-193.323	-24.6353	26506
-151.086	-25.1767	27542
-214.849	-24.7181	26907
-152.166	-25.0287	27641
-143.636	-25.0197	28125
-107.569	-25.5564	28477
-103.302	-25.634	28435
-120.296	-25.5549	28926
-122.179	-25.3234	28669
-137.727	-25.2153	29491
-85.0905	-26.9026	30023
-92.9741	-26.8893	29878
-124.959	-25.9732	29341
-119.261	-26.3221	28709
-126.348	-26.1602	29708
-124.959	-25.9732	29341
-114.616	-26.3203	30245
-116.281	-26.3993	28610
-70.6117	-26.2128	30811
-49.3181	-25.4063	32691
-61.7554	-25.3246	32234
-51.0747	-26.9302	30022
-38.3188	-26.2043	31431
-33.4963	-27.1853	29571
-34.7489	-26.5752	30860
-53.6911	-27.1527	29643
-9.75777	-27.0585	30269
-70.2665	-26.0283	30945
-11.4615	-27.1281	30049
-53.3423	-25.2005	32841
22.5764	-27.3649	30161
-8.59873	-26.1224	31679
14.2324	-26.6714	30943
6.51472	-25.8246	32280
35.2765	-25.0758	33482
45.1431	-25.753	32420
-11.4226	-26.7509	30887
-7.8002	-27.0585	30457
15.5639	-27.5604	29840
-20.4098	-25.2188	33168
-33.8014	-25.2404	33133
57.0326	-27.3649	29952
45.1431	-25.753	32420
79.3411	-26.8946	30526
77.1075	-25.1219	33305
103.198	-26.5026	31485
101.219	-25.3074	33002
91.3985	-25.6249	32562
77.1075	-25.1219	33305
122.413	-26.495	31916
112.158	-26.61	31892
132.693	-26.1866	31931
99.1321	-25.4024	32944
110.247	-26.2751	31788
122.235	-25.8917	32263
99.1321	-25.4024	32944
78.3324	-25.2424	33101
207.493	-24.4666	34077
127.255	-25.809	31979
148.77	-26.9102	31731
163.835	-26.9284	31577
135.369	-25.9557	31932
162.085	-26.1186	32185
225.09	-24.3622	34120
178.447	-26.6739	31578
239.492	-24.604	33692
152.44	-26.2038	32020
201.138	-25.954	32257
279.149	-24.7493	33232
203.025	-25.2004	32946
190.525	-26.2507	31960
227.604	-25.0368	33058
219.049	-28.2636	29674
211.324	-26.7414	31291
233.458	-25.0243	33155
196.922	-27.8141	30208
244.425	-25.6951	32443
176.369	-27.1513	30940
243.588	-24.5317	33567
236.692	-24.8548	33366
243.588	-24.5317	33567
217.733	-27.2171	30791
286.764	-25.1265	32819
226.858	-25.2762	33017
236.133	-27.1176	30786
232.401	-25.9861	31674
262.722	-26.9253	30817
249.814	-27.2062	29662
264.637	-27.868	29928
245.508	-27.3535	30542
258.793	-27.6691	29397
253.563	-27.6019	29236
288.167	-27.6529	28785
205.342	-26.8368	30066
297.182	-28.1096	28761
237.385	-25.6486	31486
279.412	-25.7613	30992
320.254	-26.4666	30565
-327.643	-11.8331	42893
-157.41	-12.9307	39815
-157.41	-12.9307	39815
-157.41	-12.9307	39815
-157.41	-12.9307	39815
-157.41	-12.9307	39815
-157.41	-12.9307	39815
-157.41	-12.9307	39815
-157.41	-12.9307	39815
-157.41	-12.9307	39815
-157.41	-12.9307	39815
466.286	-20.9764	18354
466.286	-20.9764	18354
466.286	-20.9764	18354
-471.081	-25.2056	27272
-221.122	-24.7976	25226
-161.856	-25.1001	24532
471.61	-30.0262	12721
-6.53466	-27.3951	20647
-37.2015	-27.012	21772
-187.748	-25.9684	24518
-113.567	-26.8488	21744
-113.567	-26.8488	21744
-113.567	-26.8488	21744
-377.855	-32.086	23025
185.511	-33.8023	8484
-156.409	-23.6592	22944
-142.127	-25.5963	20717
-55.0785	-26.4952	17950
-142.127	-25.5963	20717
-142.127	-25.5963	20717
-135.49	-25.8533	20163
19.829	-26.8999	15997
-100.167	-24.3171	21141
-45.7973	-26.9778	17159
-179.156	-25.0637	22096
-142.299	-25.355	21129
-135.49	-25.8533	20163
-69.5934	-25.8395	18979
81.2452	-30.5162	11177
-135.49	-25.8533	20163
-142.127	-25.5963	20717
-156.409	-23.6592	22944
-179.156	-25.0637	22096
-142.127	-25.5963	20717
-45.7973	-26.9778	17159
-150.291	-25.5126	20669
-201.05	-25.6917	22824
-152.092	-26.6725	22712
-175.331	-26.2486	24698
-179.505	-26.2667	24697
-175.331	-26.2486	24698
-155.004	-26.6487	21580
-272.256	-27.284	24777
-179.44	-26.0839	25667
-190.637	-26.1526	25634
-184.615	-25.3662	27096
-152.16	-26.6229	25803
-151.963	-25.5764	27365
-147.563	-25.6561	27439
-182.208	-25.1734	27376
-152.16	-26.6229	25803
-161.461	-26.0199	26735
-156.471	-26.0199	26763
-115.398	-26.454	27956
-97.4974	-28.2126	24899
-120.486	-26.1351	27944
-63.6386	-27.1995	29008
-53.9603	-26.9148	28699
-78.8876	-26.6045	29202
-9.52794	-27.8243	26829
-58.4636	-26.9916	28857
-103.201	-26.3587	29341
-67.6344	-27.0809	29102
-63.8621	-27.0135	27960
28.902	-29.1239	27692
20.363	-28.9734	27799
3.26229	-29.0513	27219
9.10426	-28.1315	28099
-42.6042	-27.6521	28440
32.6605	-29.0082	28669
36.2695	-29.041	28498
160.572	-29.7614	27506
136.222	-29.3926	28131
45.1177	-29.0241	29045
114.25	-27.5377	30424
150.338	-29.6218	28188
166.301	-27.7125	30587
93.0795	-27.5815	30964
110.095	-28.5892	29585
154.902	-27.5848	30827
110.095	-28.5892	29585
135.052	-28.7653	29298
220.899	-28.3055	29811
225.777	-28.4034	29980
256.373	-29.5874	27875
245.689	-28.0095	29261
262.718	-28.4647	28930
277.887	-29.6074	27462
268.716	-29.1233	28113
267.474	-29.5462	27889
293.25	-27.9483	28484
295.792	-28.543	26546
307.174	-27.8418	26669
430.816	-23.1855	30080
482.345	-23.4706	25692
-305.721	-26.0498	23127
-242.87	-24.9419	26383
-22.5678	-28.7928	19081
78.5033	-30.0349	14919
-22.5678	-28.7928	19081
78.5033	-30.0349	14919
34.809	-27.7518	19663
9.36909	-27.6958	19901
-35.3929	-28.1616	20206
-108.037	-27.5808	15984
-96.4293	-29.0976	14039
-159.414	-25.67	19590
-135.436	-26.0277	20418
-89.5083	-26.3684	17335
-98.376	-26.1293	17783
-95.3062	-26.0425	18044
-98.5958	-26.7404	20928
-167.666	-27.0267	22544
-146.425	-26.9995	23083
-94.4526	-26.6969	20519
-167.005	-27.1032	23559
-156.012	-27.4209	23099
-167.666	-27.0267	22544
-169.205	-26.0334	25402
-126.833	-27.3389	23427
-132.088	-26.4101	23752
-131.541	-27.174	23782
-79.1799	-29.0565	23029
-92.8195	-28.9063	24205
5.2101	-30.0822	23251
23.1238	-29.7904	24880
32.1843	-30.4688	24849
40.9968	-30.554	24563
44.7358	-30.6377	24524
25.6841	-29.7246	26833
18.7306	-29.7477	25103
29.9999	-29.3543	27406
40.9968	-30.554	24563
65.5431	-30.1395	27446
64.3106	-30.0674	27352
57.0216	-29.4437	27674
102.408	-30.1051	27943
79.1316	-30.639	27101
86.971	-30.4051	27539
85.3276	-30.4819	27551
58.5175	-29.772	28100
66.5687	-29.8369	28080
89.2745	-31.5405	26064
160.247	-30.7556	26937
147.654	-31.1347	26608
247.069	-31.2166	26240
223.13	-31.7296	25743
303.806	-30.8115	26655
252.787	-30.5511	27777
251.085	-29.6881	27982
256.955	-30.0268	27490
251.062	-30.1052	27355
312.64	-31.3865	25633
282.66	-31.338	25613
307.238	-31.4112	24679
322.884	-31.1823	24446
319.82	-30.309	25201
289.828	-30.3574	25718
262.174	-29.4319	26697
248.939	-29.7676	26810
217.892	-29.9199	27177
275.886	-29.4025	26446
294.378	-29.2363	25398
308.598	-29.2091	25374
295.057	-29.7738	25909
361.034	-28.5596	25134
345.082	-28.338	25310
343.602	-29.1984	23304
303.212	-28.9863	24717
252.676	-28.0895	24933
277.281	-27.8661	24946
322.525	-28.0439	24059
372.174	-27.9954	23340
354.251	-27.7266	23252
472.115	-25.0634	25246
472.115	-25.0634	25246
532.121	-25.4627	24736
517.516	-27.2791	24303
539.136	-26.9014	23625
539.136	-26.9014	23625
511.722	-25.9219	24153
1022.81	-13.6845	18396
1022.81	-13.6845	18396
440.184	-17.0377	19661
460.9	-16.9165	20394
-155.553	-17.1284	25985
-155.553	-17.1284	25985
-91.0322	-17.5062	24341
-35.5039	-28.0462	14881
-46.191	-30.3541	15971
-140.787	-28.181	18412
-162.15	-27.6599	18887
-207.302	-26.5654	20420
-192.711	-26.7348	20980
-215.594	-25.9442	20588
-166.058	-29.4601	22736
-157.469	-29.4293	22456
-98.249	-28.7451	19870
-120.18	-29.0458	21036
-109.464	-28.3238	20028
-111.609	-28.629	21250
-79.1492	-29.251	19515
-89.5772	-28.548	21844
-121.028	-29.6607	22939
-99.5645	-29.108	22663
-89.4005	-29.6815	22986
-79.3027	-29.1347	22976
4.36731	-30.4615	23399
-27.41	-30.9816	24071
35.3623	-31.281	24526
-6.34592	-31.4268	24936
40.7526	-30.6355	24605
0.494867	-31.3591	25064
39.4643	-30.776	24791
-5.1212	-31.5423	24958
75.27	-32.1074	25432
102.755	-32.8294	25154
176.241	-33.993	23429
249.371	-32.9123	24970
337.663	-32.4365	23178
304.863	-33.6563	21814
319.948	-32.3259	23727
325.603	-33.377	21908
312.998	-31.957	24483
301.881	-32.9678	22820
367.756	-32.0555	23409
306.882	-31.9501	23435
253.52	-30.7227	22231
294.697	-30.4164	23601
255.016	-28.0786	23790
243.496	-27.6729	23183
243.496	-27.6729	23183
306.71	-28.2693	23482
267.304	-28.1045	24660
292.653	-28.2049	25418
243.587	-28.5656	22309
462.435	-27.2001	23239
481.874	-28.0977	20989
513.272	-31.2341	20679
436.185	-30.176	21879
568.415	-29.2435	21757
481.969	-28.1	23776
325.434	-16.4283	22788
226.908	-15.349	24962
-11.9047	-24.0931	11655
-189.356	-26.5587	17687
-378.077	-24.5673	25522
-378.077	-24.5673	25522
-378.077	-24.5673	25522
-147.132	-29.0176	20871
-131.163	-28.5956	19999
-75.223	-28.9451	19591
-162.248	-27.6113	22702
-170.388	-27.7543	22839
-168.075	-28.0541	22355
-49.0677	-29.5239	18205
-162.248	-27.6113	22702
-14.9659	-31.902	24183
-46.0655	-33.9831	24643
-46.9422	-34.0664	24449
-37.5748	-33.7478	24165
-20.2461	-32.1356	24987
-43.9733	-33.9986	23972
87.0837	-34.1433	24324
47.2916	-34.6438	23836
257.168	-35.2529	22254
233.382	-34.6381	23125
235.389	-34.7922	22654
234.208	-35.2936	22523
268.514	-34.1784	21830
286.182	-35.0796	20701
296.006	-35.2818	20610
233.064	-33.8387	23039
277.61	-34.96	20580
294.391	-33.4926	21423
293.911	-34.262	21120
286.561	-33.9613	21306
250.058	-32.4496	22965
273.426	-32.9996	22948
217.289	-31.3841	21565
286.309	-28.4398	21850
337.715	-29.6215	20665
335.166	-29.4322	21969
334.018	-30.8155	20114
335.892	-30.6755	19118
305.112	-30.3351	21280
343.061	-30.0846	20485
267.355	-31.778	19087
235.684	-27.9075	22322
456.931	-29.4962	21364
-179.496	-22.059	16449
27.7423	-29.9252	17978
-318.982	-26.3677	24803
-353.509	-25.8809	25221
-123.951	-30.2575	19879
-149.473	-29.9086	19352
-113.525	-30.5802	18780
-130.373	-30.3175	20830
-99.0812	-29.6733	19382
-103.519	-29.9876	20306
-93.1815	-30.0644	20072
-118.358	-33.4826	24478
-79.6643	-34.5494	23667
-71.1332	-34.618	23437
-71.1759	-35.6453	22873
-26.4674	-35.1714	23639
-26.4674	-35.1714	23639
-52.6483	-34.8714	23629
-71.1759	-35.6453	22873
-41.4458	-35.3562	23158
43.9835	-35.2265	23614
77.4016	-35.3818	23448
95.6891	-36.9677	21263
120.736	-36.8466	21345
50.7223	-36.4879	21877
148.328	-35.9175	22887
113.679	-36.4514	22640
161.499	-35.5241	23728
194.142	-35.3844	23385
200.291	-36.1127	22744
230.862	-36.1233	22065
223.616	-36.287	22002
233.084	-35.7878	22367
222.708	-35.7742	22215
254.711	-35.6075	21872
242.383	-36.5133	21472
338.495	-36.0618	19430
317.036	-36.0995	20038
326.534	-36.2001	19367
264.108	-35.0962	20538
235.641	-33.9074	19985
290.759	-30.9422	18699
295.424	-30.2612	19496
333.007	-31.7913	17837
303.074	-32.1905	17358
297.944	-31.5809	17968
283.092	-32.6144	17168
272.258	-31.4717	17797
651.794	-35.0557	14903
662.724	-35.0438	13648
395.228	-32.9431	19857
710.643	-35.2096	15040
793.53	-36.1071	13358
688.113	-34.3588	16018
866.934	-36.7415	12883
-166.515	-30.0382	21357
-136.458	-32.1208	20397
-147.212	-31.2981	21263
-134.451	-31.1227	20839
-126.218	-32.4872	20260
-127.575	-32.1071	20007
-110.802	-33.3576	20421
-111.126	-32.9603	20481
-52.1133	-36.3564	21774
-52.1133	-36.3564	21774
-8.03616	-37.8216	21113
-23.4455	-37.206	21652
-12.0495	-38.5188	20111
18.1553	-38.2637	20056
71.1551	-37.0211	21907
41.3743	-38.5399	21057
57.7794	-37.9855	21006
116.711	-37.513	21830
118.836	-36.8923	22781
222.089	-38.474	19734
201.493	-37.4031	21226
213.38	-37.7044	20642
188.938	-36.6669	22400
189.529	-37.043	21792
189.751	-36.3836	22796
260.275	-37.8112	19073
203.474	-37.0206	21613
306.807	-37.3603	18608
266.839	-37.2999	18830
258.517	-37.2863	19941
349.534	-37.3268	17442
291.306	-35.2121	18044
346.065	-35.8678	16273
270.215	-32.3247	18298
289.176	-34.21	17565
291.925	-31.6971	17611
284.909	-33.1452	16753
303.569	-31.8879	17324
322.281	-31.9956	16921
276.489	-32.3628	17099
313.297	-32.639	16497
374.237	-32.9167	16044
287.834	-32.3219	16829
282.285	-31.9115	17318
292.15	-32.564	17106
-304.382	-20.8325	26302
-232.221	-20.4013	26612
-232.221	-20.4013	26612
-89.848	-23.1917	19611
11.9985	-23.9292	20171
-169.414	-32.4008	21692
-162.506	-32.1323	21461
-182.475	-32.5842	22081
-195.303	-33.7131	21318
-185.852	-33.0465	21816
-213.234	-34.5125	21329
-96.7959	-34.1401	19030
-50.4108	-36.2721	18354
-35.9736	-36.4207	18511
-131.761	-35.491	20897
-87.5153	-35.7232	19810
-109.158	-37.3026	20483
-121.414	-37.4103	20429
-122.336	-37.0121	20648
-24.1132	-38.6811	19312
-45.1161	-39.637	18642
-18.4503	-39.1529	18956
-9.01749	-39.1529	19241
-26.5378	-38.3663	19639
-25.8004	-38.168	19885
-7.15007	-40.2012	19193
4.38101	-38.1331	20886
-13.4125	-38.9231	20132
-4.81727	-38.9231	20204
-29.239	-39.3388	19885
-30.7726	-39.8054	19092
-11.3429	-38.9877	20045
7.17535	-39.6857	19461
-3.40821	-40.0735	19754
45.8636	-39.8836	20244
8.66613	-39.1446	20590
36.8008	-39.4613	20935
124.726	-39.7823	20197
212.39	-38.7605	19940
310.647	-38.7641	17207
276.211	-38.5339	18255
338.934	-36.8089	16263
310.19	-37.5214	16870
360.515	-36.8047	16621
451.733	-37.7832	15598
400.193	-38.1601	15002
444.773	-37.8438	15011
411.479	-35.0093	16071
410.141	-35.9835	15184
428.195	-35.1365	15413
335.174	-32.8819	16034
400.832	-33.2706	15531
466.831	-34.245	14712
469.74	-34.7071	14762
226.596	-25.1458	17934
-4.74402	-31.4887	15970
-193.718	-34.2139	21242
-104.825	-37.1497	18926
-89.838	-36.1959	18635
-44.1154	-38.3809	18493
-42.4748	-39.7875	17795
-31.3851	-40.4242	18094
-30.4641	-40.4657	17565
-33.5064	-40.4132	18037
-26.3374	-40.929	18165
-44.1973	-39.8771	18246
-38.7584	-39.96	17922
-27.6055	-41.0693	18284
-33.8189	-40.7482	18584
-22.1082	-41.0152	18586
-8.76876	-41.8217	17777
-7.55885	-41.0885	18566
59.8515	-40.2741	19952
45.7869	-40.8279	19169
176.079	-41.5544	16992
233.124	-39.9257	17564
315.748	-40.3536	15030
402.007	-39.2025	13434
395.493	-39.248	13866
432.729	-35.6355	14779
474.063	-34.836	13973
-58.9718	-28.5998	18905
-58.9718	-28.5998	18905
-58.9718	-28.5998	18905
-57.6637	-28.1875	19164
483.989	-27.7976	14045
-140.275	-34.9697	18288
-168.326	-35.9496	18986
-191.689	-37.0865	19039
-144.13	-38.2438	19117
-111.884	-38.4258	18647
-93.1087	-39.4121	17919
-21.2558	-40.1506	16756
-29.8469	-39.0402	17560
-14.386	-39.0817	17818
-3.50329	-41.8559	17215
-45.0226	-40.1892	17840
-31.2213	-40.8751	17185
17.9776	-41.1929	17023
23.7149	-41.5076	16965
-12.1347	-40.7815	17217
100.314	-41.2482	15730
-6.9194	-41.1493	17568
53.258	-41.6354	16404
81.4773	-42.559	15716
-18.2235	-41.653	17963
58.6919	-43.5242	15619
-18.2235	-41.653	17963
-5.08908	-42.0255	17486
10.7384	-42.0305	18036
-13.7491	-41.6911	18243
-7.32679	-41.7213	17903
24.1715	-42.4478	17478
90.1197	-41.9801	17212
44.0389	-41.8479	17618
752.154	-29.4703	16414
465.096	-34.4905	19340
637.569	-39.2721	14013
411.199	-37.7957	16326
