# Supplementary material for: Climate-change-induced range shifts of three allergenic ragweeds (Ambrosia L.) in Europe and their potential impact on human health
Source: PeerJ. 2017 Mar 16;5:e3104. doi: 10.7717/peerj.3104 (PMC5357339; doi:10.7717/peerj.3104)
Supplement: Data S3 [file peerj-05-3104-s009.xlsx]

## Sheet: Native_climate_data_behrm
MyID	Behrm_x	Behrm_y	wbal_north	tmin_north	ddeg5_nort
779	-6.21022e+06	5.18822e+06	752.154	-29.4703	16414
783	-7.7017e+06	5.01764e+06	325.441	-28.8807	21587
820	-7.25172e+06	5.21944e+06	475.596	-36.2587	18375
727	-7.06826e+06	5.23541e+06	523.416	-34.922	19151
728	-7.11788e+06	5.23329e+06	491.272	-35.3382	19279
729	-7.10423e+06	5.22526e+06	487.709	-34.6169	20200
738	-7.11426e+06	5.2379e+06	498.176	-35.7893	18938
742	-7.10373e+06	5.22908e+06	504.204	-34.5645	20272
746	-7.11324e+06	5.23116e+06	486.827	-34.9306	19775
748	-7.07939e+06	5.29572e+06	605.628	-37.8524	16509
753	-7.10415e+06	5.22475e+06	487.709	-34.6169	20200
754	-7.13677e+06	5.24777e+06	573.38	-36.9624	17136
755	-7.12695e+06	5.21899e+06	461.578	-35.0624	19581
771	-7.08185e+06	5.19692e+06	432.6	-33.8453	19287
772	-7.08574e+06	5.21937e+06	474.856	-34.6041	19584
785	-7.10433e+06	5.27876e+06	615.387	-37.7327	16157
789	-7.11345e+06	5.21388e+06	466.071	-34.7854	19593
804	-7.10561e+06	5.22678e+06	487.709	-34.6169	20200
810	-7.13094e+06	5.23971e+06	533.241	-36.3743	17993
811	-7.11891e+06	5.2414e+06	511.476	-36.0818	18478
812	-7.09678e+06	5.2771e+06	585.238	-37.3666	16904
730	-7.0877e+06	5.24372e+06	499.855	-35.416	19316
821	-7.95047e+06	4.93565e+06	260.916	-28.7046	23146
822	-7.96813e+06	4.94986e+06	238.041	-28.4785	23178
823	-7.98366e+06	4.91628e+06	296	-28.6226	23362
824	-7.83787e+06	4.99238e+06	460.112	-30.1986	20239
825	-7.8618e+06	5.02964e+06	504.394	-30.3651	19565
826	-7.63274e+06	5.00101e+06	393.296	-28.0884	22226
827	-7.65783e+06	5.06537e+06	259.727	-29.3389	21282
828	-7.65783e+06	5.06537e+06	259.727	-29.3389	21282
829	-7.60341e+06	5.07834e+06	359.66	-30.8076	18935
830	-7.05961e+06	5.04679e+06	500.672	-32.1439	19173
833	-7.80873e+06	5.14091e+06	590.227	-30.6525	17469
834	-7.70424e+06	5.16828e+06	557.642	-33.5011	18520
835	-7.38429e+06	5.12019e+06	468.529	-32.9366	19249
836	-7.40272e+06	5.11404e+06	441.894	-32.2513	19324
837	-7.40272e+06	5.11404e+06	441.894	-32.2513	19324
840	-6.2443e+06	5.13908e+06	980.499	-28.9217	16885
841	-7.98337e+06	5.25145e+06	355.684	-34.1726	16415
842	-7.42279e+06	5.25073e+06	417.907	-37.5551	16998
843	-7.37609e+06	5.22333e+06	334.225	-36.4844	18257
844	-7.3017e+06	5.2209e+06	444.762	-36.0164	18604
845	-7.3017e+06	5.2209e+06	444.762	-36.0164	18604
846	-7.3072e+06	5.22234e+06	444.762	-36.0164	18604
847	-7.31356e+06	5.21387e+06	396.568	-35.5577	19013
848	-7.28954e+06	5.20728e+06	412.142	-35.6421	19110
849	-7.28635e+06	5.20276e+06	416.561	-35.4023	19058
850	-7.32649e+06	5.23727e+06	555.061	-37.0146	16636
851	-7.31984e+06	5.2163e+06	391.894	-35.6582	18765
852	-7.29272e+06	5.21026e+06	412.142	-35.6421	19110
853	-7.29118e+06	5.21585e+06	412.142	-35.6421	19110
854	-7.30401e+06	5.21784e+06	444.762	-36.0164	18604
855	-7.28954e+06	5.20728e+06	412.142	-35.6421	19110
856	-7.17211e+06	5.2388e+06	673.039	-37.1527	16385
857	-7.16089e+06	5.20426e+06	460.867	-35.0637	19039
858	-7.17211e+06	5.23134e+06	532.733	-36.0119	18169
859	-7.09338e+06	5.22828e+06	511.344	-34.6705	19912
860	-7.08853e+06	5.24329e+06	499.855	-35.416	19316
861	-7.09338e+06	5.22828e+06	511.344	-34.6705	19912
862	-7.13516e+06	5.21029e+06	441.053	-34.7731	19733
863	-7.11152e+06	5.26716e+06	604.584	-37.6092	16346
864	-7.10621e+06	5.24179e+06	500.379	-35.5141	19349
865	-7.0837e+06	5.19673e+06	432.6	-33.8453	19287
866	-7.10303e+06	5.22684e+06	487.709	-34.6169	20200
867	-7.08531e+06	5.22031e+06	474.856	-34.6041	19584
868	-7.0837e+06	5.24329e+06	500.154	-35.3833	19127
869	-7.1094e+06	5.21784e+06	468.299	-34.8843	19797
870	-7.13047e+06	5.21533e+06	441.053	-34.7731	19733
871	-7.13198e+06	5.22234e+06	462.422	-35.2055	19431
872	-7.11345e+06	5.24478e+06	498.176	-35.7893	18938
873	-7.12664e+06	5.21294e+06	452.106	-34.8146	19631
874	-7.10139e+06	5.22531e+06	487.709	-34.6169	20200
875	-7.08853e+06	5.24329e+06	499.855	-35.416	19316
876	-6.96949e+06	5.2163e+06	774.107	-36.0368	15384
877	-6.97046e+06	5.20836e+06	774.107	-36.0368	15384
878	-6.94219e+06	5.22234e+06	657.635	-35.8778	16772
879	-6.93254e+06	5.21333e+06	638.305	-35.7466	16552
880	-6.88729e+06	5.25368e+06	780.223	-36.8175	14945
881	-6.93316e+06	5.21257e+06	638.305	-35.7466	16552
882	-6.3761e+06	5.26272e+06	679.919	-33.2145	16663
883	-6.31985e+06	5.24481e+06	827.627	-33.3826	14744
884	-6.35198e+06	5.26567e+06	694.551	-33.2522	16498
885	-5.93391e+06	5.21477e+06	1109.77	-29.5119	14214
886	-7.23966e+06	5.3057e+06	637.569	-39.2721	14013
887	-7.31205e+06	5.3498e+06	602.151	-40.0716	13801
888	-7.0708e+06	5.29976e+06	632.747	-38.668	15345
889	-7.13998e+06	5.27013e+06	734.528	-38.2702	14672
890	-7.0316e+06	5.29343e+06	488.684	-36.799	17808
891	-6.88574e+06	5.34558e+06	822.417	-37.5194	15403
892	-6.35684e+06	5.28943e+06	718.859	-34.3934	15906
893	-6.25874e+06	5.33074e+06	712.988	-33.7439	15698
894	-8.15714e+06	5.38356e+06	888.774	-37.9416	12104
895	-7.67297e+06	5.39305e+06	418.532	-40.9675	14148
896	-7.68754e+06	5.40305e+06	408.633	-41.5967	13833
897	-7.45839e+06	5.4253e+06	589.21	-42.212	12288
898	-6.76533e+06	5.41666e+06	0	0	0
902	-9.12702e+06	5.52574e+06	205.56	-43.3533	15470
903	-8.97641e+06	5.49949e+06	267.715	-42.311	15534
904	-1.07203e+07	5.57059e+06	-91.4047	-34.611	16776
905	-1.07203e+07	5.57059e+06	-91.4047	-34.611	16776
906	-9.6438e+06	5.60163e+06	50.8858	-43.9173	15268
907	-9.39516e+06	5.56022e+06	60.4064	-43.9109	16906
908	-1.06778e+07	5.61818e+06	-144.334	-35.445	17709
909	-6.16383e+06	5.68369e+06	831.88	-42.7874	6294
911	-9.53284e+06	5.73153e+06	59.0072	-45.5934	14354
912	-9.7399e+06	5.83794e+06	130.557	-45.7629	13273
913	-1.09239e+07	5.9093e+06	60.7273	-38.7088	13260
4530	-8.98239e+06	2.11637e+06	-311.693	7.83083	66583
4531	-8.98239e+06	2.11637e+06	-311.693	7.83083	66583
4533	-8.98384e+06	2.10733e+06	-311.693	7.83083	66583
4534	-8.97966e+06	2.11551e+06	-311.693	7.83083	66583
4535	-8.9161e+06	2.07e+06	177.498	-0.476597	44980
4536	-8.91224e+06	2.12481e+06	487.663	1.96695	50916
4538	-8.9264e+06	2.09795e+06	362.357	-4.21358	36157
4539	-8.93849e+06	2.10488e+06	260.756	-1.83983	41874
4540	-8.90964e+06	2.12016e+06	487.663	1.96695	50916
4541	-8.93781e+06	2.10476e+06	260.756	-1.83983	41874
4542	-8.9161e+06	2.07e+06	177.498	-0.476597	44980
4543	-8.91871e+06	2.08004e+06	242.727	-0.616628	44465
4544	-8.89989e+06	2.11222e+06	504.286	-0.216394	45499
4545	-8.90397e+06	2.11045e+06	504.286	-0.216394	45499
4546	-8.90938e+06	2.11222e+06	463.27	-1.60201	42259
4548	-8.90397e+06	2.11045e+06	504.286	-0.216394	45499
4549	-8.91977e+06	2.11026e+06	436.746	-3.0296	38833
4551	-8.90858e+06	2.11099e+06	463.27	-1.60201	42259
4556	-8.91977e+06	2.11026e+06	436.746	-3.0296	38833
4557	-8.93945e+06	2.10529e+06	260.756	-1.83983	41874
4559	-8.9134e+06	2.1061e+06	408.603	-3.72529	37261
4560	-8.90964e+06	2.12016e+06	487.663	1.96695	50916
4561	-8.91881e+06	2.08065e+06	242.727	-0.616628	44465
4563	-8.91224e+06	2.12481e+06	487.663	1.96695	50916
4564	-8.91603e+06	2.11894e+06	487.663	1.96695	50916
4565	-8.93781e+06	2.10476e+06	260.756	-1.83983	41874
4566	-8.91253e+06	2.12469e+06	487.663	1.96695	50916
4567	-8.91881e+06	2.08065e+06	242.727	-0.616628	44465
4568	-8.91228e+06	2.12485e+06	487.663	1.96695	50916
4569	-8.90964e+06	2.12016e+06	487.663	1.96695	50916
4570	-8.91868e+06	2.08007e+06	242.727	-0.616628	44465
4575	-8.90964e+06	2.12016e+06	487.663	1.96695	50916
4576	-8.90935e+06	2.11222e+06	463.27	-1.60201	42259
4579	-8.91868e+06	2.08007e+06	242.727	-0.616628	44465
4581	-8.90945e+06	2.1132e+06	463.27	-1.60201	42259
4582	-8.93656e+06	2.122e+06	622.949	-1.20169	41878
4583	-8.92297e+06	2.08279e+06	242.727	-0.616628	44465
4584	-8.91253e+06	2.12469e+06	487.663	1.96695	50916
4587	-8.90945e+06	2.1132e+06	463.27	-1.60201	42259
4588	-8.93656e+06	2.122e+06	622.949	-1.20169	41878
4589	-8.92337e+06	2.11548e+06	436.746	-3.0296	38833
4590	-8.92077e+06	2.1256e+06	540.242	0.655384	47175
4591	-8.91398e+06	2.11258e+06	463.27	-1.60201	42259
4593	-8.92589e+06	2.11697e+06	436.746	-3.0296	38833
4594	-8.91398e+06	2.11258e+06	463.27	-1.60201	42259
4595	-8.93945e+06	2.10529e+06	260.756	-1.83983	41874
4596	-8.91228e+06	2.12485e+06	487.663	1.96695	50916
4597	-8.91871e+06	2.08004e+06	242.727	-0.616628	44465
4598	-8.87494e+06	2.0541e+06	434.147	0.296769	47559
4602	-9.31363e+06	2.24499e+06	1733.79	4.2745	60034
4603	-9.31363e+06	2.24499e+06	1733.79	4.2745	60034
4604	-9.07859e+06	2.24937e+06	954.985	9.90323	75137
4605	-9.07856e+06	2.24937e+06	954.985	9.90323	75137
4606	-8.87754e+06	2.22728e+06	698.803	13.1891	81246
4607	-8.8779e+06	2.22711e+06	698.803	13.1891	81246
4608	-8.96358e+06	2.15741e+06	237.69	3.11551	55816
4609	-8.96358e+06	2.15693e+06	244.286	2.99046	55135
4610	-8.96358e+06	2.15693e+06	244.286	2.99046	55135
4611	-8.8779e+06	2.22711e+06	698.803	13.1891	81246
4612	-8.92177e+06	2.13788e+06	395.9	4.93577	59295
4613	-8.9491e+06	2.2293e+06	1077.08	12.9161	81478
4614	-8.93849e+06	2.22809e+06	918.034	13.1018	81636
4615	-8.9218e+06	2.13788e+06	395.9	4.93577	59295
4616	-8.87674e+06	2.22687e+06	591.136	12.9911	80754
4617	-9.3692e+06	2.36271e+06	360.042	-2.80133	42487
4618	-9.36563e+06	2.34251e+06	446.406	-1.50921	45957
4619	-9.38493e+06	2.34856e+06	-166.375	-3.73418	40224
4620	-9.36627e+06	2.36469e+06	702.481	-0.124349	49966
4621	-9.3692e+06	2.36271e+06	360.042	-2.80133	42487
4622	-9.38584e+06	2.35804e+06	-15.83	-5.89965	33445
4623	-9.36081e+06	2.36271e+06	702.481	-0.124349	49966
4624	-9.3656e+06	2.34255e+06	446.406	-1.50921	45957
4625	-9.3858e+06	2.358e+06	-15.83	-5.89965	33445
4626	-9.3858e+06	2.358e+06	-15.83	-5.89965	33445
4627	-9.3648e+06	2.34416e+06	446.406	-1.50921	45957
4628	-9.36078e+06	2.36271e+06	702.481	-0.124349	49966
4630	-9.38584e+06	2.35804e+06	-15.83	-5.89965	33445
4631	-9.36631e+06	2.36465e+06	702.481	-0.124349	49966
4632	-9.38715e+06	2.34541e+06	-120.948	-4.88565	37013
4633	-9.38715e+06	2.34541e+06	-120.948	-4.88565	37013
4636	-9.38493e+06	2.34856e+06	-166.375	-3.73418	40224
4637	-9.34872e+06	2.36412e+06	1006.91	2.07365	55668
4638	-9.35434e+06	2.37081e+06	954.959	1.72311	54921
4639	-9.35434e+06	2.37077e+06	954.959	1.72311	54921
4640	-9.3582e+06	2.36755e+06	819.619	0.068786	50589
4641	-9.35396e+06	2.36706e+06	954.959	1.72311	54921
4642	-9.34875e+06	2.36416e+06	1006.91	2.07365	55668
4643	-9.34872e+06	2.36412e+06	1006.91	2.07365	55668
4644	-9.34875e+06	2.36416e+06	1006.91	2.07365	55668
4645	-9.35394e+06	2.36704e+06	954.959	1.72311	54921
4648	-9.22949e+06	2.33392e+06	59.2666	10.3712	77145
4651	-9.1742e+06	2.31429e+06	673.7	6.30065	67172
4654	-9.22953e+06	2.33391e+06	59.2666	10.3712	77145
4663	-9.19353e+06	2.33045e+06	710.776	6.2493	66775
4665	-9.1935e+06	2.33041e+06	710.776	6.2493	66775
4668	-9.17424e+06	2.31429e+06	673.7	6.30065	67172
4678	-8.97486e+06	2.27791e+06	436.538	12.079	79932
4680	-8.97531e+06	2.27953e+06	436.538	12.079	79932
4682	-9.00699e+06	2.28883e+06	559.982	11.2186	78226
4683	-8.97535e+06	2.27949e+06	436.538	12.079	79932
4684	-8.97483e+06	2.27791e+06	436.538	12.079	79932
4685	-9.00719e+06	2.28859e+06	559.982	11.2186	78226
4686	-9.00603e+06	2.28726e+06	559.982	11.2186	78226
4689	-9.00603e+06	2.28721e+06	559.982	11.2186	78226
4690	-9.00716e+06	2.28863e+06	559.982	11.2186	78226
4691	-8.9848e+06	2.28677e+06	521.991	11.8861	79713
4692	-8.9848e+06	2.28677e+06	521.991	11.8861	79713
4693	-8.87838e+06	2.33452e+06	39.4423	12.1798	78950
4694	-8.87835e+06	2.33448e+06	39.4423	12.1798	78950
4695	-8.97271e+06	2.28283e+06	436.538	12.079	79932
4696	-8.92624e+06	2.32677e+06	56.6722	11.689	77584
4697	-8.93353e+06	2.32543e+06	25.9651	11.5489	77131
4698	-8.92627e+06	2.32675e+06	56.6722	11.689	77584
4699	-8.97271e+06	2.28283e+06	436.538	12.079	79932
4700	-8.93357e+06	2.32544e+06	25.9651	11.5489	77131
4704	-8.78469e+06	2.27937e+06	-145.487	11.0578	77272
4706	-8.79791e+06	2.37733e+06	0	0	0
4709	-9.73386e+06	2.48849e+06	-260.058	-2.90406	44909
4710	-9.73383e+06	2.4883e+06	-260.058	-2.90406	44909
4712	-9.73383e+06	2.48826e+06	-260.058	-2.90406	44909
4714	-9.56163e+06	2.40719e+06	7.15669	-5.94041	35810
4715	-9.56136e+06	2.4085e+06	7.15669	-5.94041	35810
4717	-9.5724e+06	2.41946e+06	139.349	-6.79093	33503
4718	-9.5843e+06	2.48926e+06	-229.483	-4.3118	40574
4719	-9.5616e+06	2.40715e+06	7.15669	-5.94041	35810
4720	-9.58427e+06	2.48926e+06	-229.483	-4.3118	40574
4721	-9.5614e+06	2.40848e+06	7.15669	-5.94041	35810
4722	-9.51712e+06	2.46847e+06	-213.167	-7.2562	32391
4723	-9.51344e+06	2.47611e+06	-213.167	-7.2562	32391
4724	-9.51345e+06	2.47616e+06	-213.167	-7.2562	32391
4725	-9.51708e+06	2.46843e+06	-213.167	-7.2562	32391
4726	-9.38329e+06	2.45319e+06	123.195	-7.78493	29852
4727	-9.38493e+06	2.38398e+06	215.47	-10.0589	21371
4728	-9.38889e+06	2.47772e+06	1031.37	-3.36916	43335
4729	-9.38892e+06	2.47774e+06	1031.37	-3.36916	43335
4730	-9.372e+06	2.46522e+06	444.601	-5.75184	35921
4731	-9.38493e+06	2.38403e+06	215.47	-10.0589	21371
4732	-9.37203e+06	2.46522e+06	444.601	-5.75184	35921
4733	-9.38329e+06	2.45319e+06	123.195	-7.78493	29852
4734	-9.30109e+06	2.41611e+06	-406.783	9.4382	74858
4735	-9.30128e+06	2.45583e+06	-157.328	7.5638	71215
4736	-9.30125e+06	2.45579e+06	-157.328	7.5638	71215
4737	-9.30128e+06	2.45583e+06	-157.328	7.5638	71215
4738	-9.29935e+06	2.45198e+06	-157.328	7.5638	71215
4739	-9.30128e+06	2.45583e+06	-157.328	7.5638	71215
4743	-9.30109e+06	2.41611e+06	-406.783	9.4382	74858
4744	-9.34791e+06	2.40699e+06	907.869	0.412227	52138
4745	-9.30125e+06	2.45579e+06	-157.328	7.5638	71215
4746	-9.29959e+06	2.45255e+06	-157.328	7.5638	71215
4747	-9.34788e+06	2.40703e+06	863.859	0.568638	52954
4749	-9.29954e+06	2.45258e+06	-157.328	7.5638	71215
4751	-9.30108e+06	2.41608e+06	-406.783	9.4382	74858
4753	-9.29806e+06	2.42508e+06	-327.878	9.13384	74343
4754	-9.30932e+06	2.39493e+06	-462.139	9.54598	74408
4755	-9.3527e+06	2.44115e+06	600.947	-0.921718	49297
4756	-9.30128e+06	2.45583e+06	-157.328	7.5638	71215
4757	-9.3527e+06	2.44115e+06	600.947	-0.921718	49297
4758	-9.30012e+06	2.41306e+06	-406.783	9.4382	74858
4761	-9.34572e+06	2.39472e+06	546.494	3.15504	59107
4762	-9.30125e+06	2.45579e+06	-157.328	7.5638	71215
4763	-9.30108e+06	2.41608e+06	-406.783	9.4382	74858
4766	-9.30012e+06	2.41302e+06	-406.783	9.4382	74858
4767	-9.3007e+06	2.45403e+06	-157.328	7.5638	71215
4768	-9.29809e+06	2.42512e+06	-327.878	9.13384	74343
4769	-9.30069e+06	2.45399e+06	-157.328	7.5638	71215
4772	-9.29935e+06	2.44476e+06	-204.17	8.16735	72443
4774	-9.30128e+06	2.45583e+06	-157.328	7.5638	71215
4775	-9.30929e+06	2.39497e+06	-462.139	9.54598	74408
4776	-9.29964e+06	2.44512e+06	-204.17	8.16735	72443
4778	-9.29967e+06	2.44516e+06	-204.17	8.16735	72443
4779	-9.34576e+06	2.39472e+06	546.494	3.15504	59107
4781	-9.30125e+06	2.45579e+06	-157.328	7.5638	71215
4782	-9.30125e+06	2.45579e+06	-157.328	7.5638	71215
4783	-9.30031e+06	2.41584e+06	-406.783	9.4382	74858
4788	-8.74262e+06	2.47604e+06	-434.018	11.2238	76703
4789	-8.7058e+06	2.45282e+06	-393.865	10.873	76913
4790	-8.74313e+06	2.47617e+06	-434.018	11.2238	76703
4791	-8.70628e+06	2.44917e+06	-393.865	10.873	76913
4792	-8.76146e+06	2.41219e+06	-335.705	10.9062	76066
4795	-8.70625e+06	2.44921e+06	-393.865	10.873	76913
4796	-8.7432e+06	2.47676e+06	-434.018	11.2238	76703
4798	-9.8882e+06	2.50127e+06	-272.589	-1.74888	48459
4799	-9.8882e+06	2.50127e+06	-272.589	-1.74888	48459
4800	-9.62258e+06	2.51927e+06	-224.859	-5.19615	37399
4802	-9.50229e+06	2.55523e+06	467.614	-5.70983	35646
4804	-9.50226e+06	2.55523e+06	467.614	-5.70983	35646
4805	-9.44118e+06	2.58908e+06	376.451	4.45818	68936
4806	-9.39844e+06	2.61559e+06	-77.1439	4.80248	70550
4807	-9.44118e+06	2.58912e+06	376.451	4.45818	68936
4808	-9.36013e+06	2.55878e+06	0	0	0
4809	-9.39844e+06	2.61559e+06	-77.1439	4.80248	70550
4810	-9.35997e+06	2.55862e+06	0	0	0
4811	-9.40902e+06	2.58912e+06	116.357	4.66106	69879
4812	-9.40905e+06	2.58908e+06	116.357	4.66106	69879
4813	-9.39841e+06	2.61559e+06	-77.1439	4.80248	70550
4814	-9.39841e+06	2.61559e+06	-77.1439	4.80248	70550
4815	-9.36013e+06	2.55882e+06	0	0	0
4816	-9.35994e+06	2.55858e+06	0	0	0
4817	-9.35917e+06	2.55726e+06	0	0	0
4818	-9.35434e+06	2.51759e+06	-97.2582	5.23776	68838
4819	-9.35917e+06	2.55722e+06	0	0	0
4820	-9.35434e+06	2.51759e+06	-97.2582	5.23776	68838
4822	-9.42446e+06	2.66756e+06	17.9708	4.58799	70255
4825	-9.42449e+06	2.66755e+06	17.9708	4.58799	70255
4828	-9.94995e+06	2.8238e+06	-376.642	-7.85903	35956
4829	-9.96395e+06	2.75326e+06	-429.965	-3.05841	49881
4830	-9.96398e+06	2.7533e+06	-429.965	-3.05841	49881
4831	-9.82809e+06	2.78898e+06	-564.3	-4.86759	41982
4832	-9.57337e+06	2.74023e+06	352.246	3.01588	67802
4833	-9.57337e+06	2.74023e+06	352.246	3.01588	67802
4834	-9.44157e+06	2.76379e+06	-401.826	4.47671	70098
4835	-9.44156e+06	2.76375e+06	-401.826	4.47671	70098
4836	-9.44215e+06	2.76947e+06	-450.143	4.51982	70261
4837	-9.44215e+06	2.76947e+06	-450.143	4.51982	70261
4838	-1.02676e+07	2.88571e+06	0	0	0
4839	-1.02676e+07	2.88571e+06	0	0	0
4840	-1.00507e+07	2.9655e+06	-580.038	-5.28366	46283
4841	-1.00266e+07	2.92841e+06	-388.302	-7.0179	41510
4842	-9.94224e+06	2.9544e+06	-627.941	-5.69355	45206
4843	-9.94967e+06	2.96924e+06	-594.473	-6.18779	43975
4844	-1.00266e+07	2.92841e+06	-388.302	-7.0179	41510
4845	-9.84083e+06	2.89992e+06	-626.339	-4.32728	43725
4847	-9.67757e+06	3.169e+06	-756.034	-3.81041	57752
4848	-9.66329e+06	3.14096e+06	-515.039	-3.19853	57511
4849	-9.66471e+06	3.13591e+06	-543.901	-3.539	54701
4851	-9.66332e+06	3.14092e+06	-515.039	-3.19853	57511
4852	-9.67757e+06	3.169e+06	-756.034	-3.81041	57752
4853	-9.66474e+06	3.13588e+06	-543.901	-3.539	54701
4854	-1.01192e+07	3.33376e+06	-770.508	-7.85768	50676
4855	-1.01192e+07	3.33376e+06	-770.508	-7.85768	50676
4856	-1.04398e+07	3.54702e+06	-219.964	-12.3031	35409
4857	-1.04398e+07	3.54706e+06	-219.964	-12.3031	35409
4858	-1.04574e+07	3.61636e+06	-141.786	-14.1054	30613
4859	-1.04573e+07	3.6164e+06	-141.786	-14.1054	30613
7645	-7.90744e+06	3.30986e+06	-23.6761	2.05121	65472
7646	-7.85405e+06	3.21652e+06	-9.77052	3.46213	66440
7647	-7.83335e+06	3.31626e+06	-15.531	2.05257	64623
7648	-7.8321e+06	3.27049e+06	11.1799	2.53802	65186
7650	-7.76107e+06	3.28052e+06	52.6009	3.01071	65679
7651	-7.7626e+06	3.22378e+06	109.219	4.57658	67916
7652	-7.94658e+06	3.37621e+06	-97.7621	0.72935	63867
7653	-7.94751e+06	3.34361e+06	-77.0713	1.33278	64687
7654	-7.94527e+06	3.42435e+06	-148.128	0.129104	63574
7655	-7.98317e+06	3.42393e+06	-85.8371	-0.660339	62792
7656	-7.84844e+06	3.36022e+06	-34.4085	1.37882	63883
7657	-7.89317e+06	3.34317e+06	-14.8269	1.33278	63838
7658	-7.88294e+06	3.4304e+06	-76.6777	0.485692	63674
7659	-7.76179e+06	3.36448e+06	-56.2811	2.22773	65157
7660	-7.80476e+06	3.36527e+06	-55.8479	1.69832	64367
7661	-7.7572e+06	3.33054e+06	-2.66953	2.68491	65695
7662	-7.77476e+06	3.40076e+06	-92.4718	1.79903	64645
7663	-9.56183e+06	3.47378e+06	-729.987	-5.9011	61552
7664	-9.5104e+06	3.47398e+06	-657.229	-5.89279	60928
7665	-7.91951e+06	3.51468e+06	72.8326	-1.92703	60615
7666	-7.95705e+06	3.49726e+06	95.6436	-2.21018	60496
7667	-7.9617e+06	3.53051e+06	125.491	-3.06337	59102
7668	-7.95419e+06	3.46889e+06	17.7314	-0.956675	62376
7669	-7.84647e+06	3.49287e+06	-58.6037	-0.471368	62672
7670	-7.8373e+06	3.51474e+06	-27.767	-0.935556	61716
7671	-7.82956e+06	3.4415e+06	-90.8707	0.644042	63760
7672	-7.88461e+06	3.52113e+06	10.8791	-1.58868	60941
7674	-9.75973e+06	3.64705e+06	-729.53	-9.65992	54337
7675	-9.74029e+06	3.6088e+06	-753.478	-8.56232	56750
7676	-9.62999e+06	3.64115e+06	-578.149	-9.41162	52918
7677	-9.62554e+06	3.58652e+06	-750.362	-6.47818	60472
7678	-9.48301e+06	3.63776e+06	-274.465	-10.2055	52050
7679	-9.20408e+06	3.64291e+06	-42.9158	-7.15402	55529
7680	-9.08322e+06	3.64321e+06	206.357	-7.07668	56085
7681	-8.99253e+06	3.64181e+06	232.385	-7.4205	54980
7683	-8.8254e+06	3.61829e+06	415.75	-6.79414	55158
7685	-8.78642e+06	3.6476e+06	407.685	-7.36061	54892
7686	-8.71819e+06	3.64901e+06	419.083	-7.01991	55240
7687	-8.69365e+06	3.62748e+06	356.812	-6.27866	56597
7688	-8.76459e+06	3.58487e+06	368.978	-5.80851	56367
7689	-8.68569e+06	3.65657e+06	368.291	-6.62242	56063
7690	-8.72226e+06	3.60258e+06	371.036	-6.0142	56439
7693	-8.02704e+06	3.61279e+06	183.537	-4.71082	57006
7694	-7.98808e+06	3.57841e+06	152.822	-4.13382	57634
7695	-7.94645e+06	3.62282e+06	126.361	-4.65425	56230
7696	-7.98932e+06	3.62929e+06	170.576	-4.97796	56365
7697	-7.91757e+06	3.57105e+06	107.376	-3.47544	57658
7698	-7.84404e+06	3.59988e+06	32.547	-2.67437	59277
7699	-7.85464e+06	3.64856e+06	25.7502	-3.67138	58302
7700	-7.82875e+06	3.55496e+06	-14.901	-1.84257	60306
7701	-7.89817e+06	3.65621e+06	102.928	-4.52915	57044
7702	-7.88683e+06	3.61495e+06	93.2836	-3.38205	58304
7703	-9.6245e+06	3.71312e+06	-554.702	-11.2183	50178
7704	-9.43437e+06	3.69568e+06	-354.019	-9.82347	54162
7705	-9.4169e+06	3.72999e+06	-307.623	-10.7012	52600
7706	-9.22157e+06	3.74029e+06	-30.328	-9.72079	52600
7707	-9.00608e+06	3.73098e+06	250.421	-9.20708	52600
7708	-9.00774e+06	3.68402e+06	228.016	-8.03714	54308
7709	-8.9165e+06	3.73976e+06	388.546	-9.44023	52326
7710	-8.95662e+06	3.73125e+06	320.384	-9.26495	52582
7711	-8.8829e+06	3.68162e+06	333.937	-7.62461	54481
7712	-8.95543e+06	3.68852e+06	326.875	-8.62739	53529
7713	-8.87708e+06	3.72493e+06	397.986	-8.42684	53596
7714	-8.78495e+06	3.75264e+06	438.499	-9.15376	52148
7716	-8.8393e+06	3.67316e+06	381.538	-7.48298	54698
7717	-8.81396e+06	3.6879e+06	376.063	-7.91827	54530
7718	-8.78928e+06	3.7189e+06	378.921	-8.51538	53817
7719	-8.82111e+06	3.75512e+06	434.065	-8.94917	52646
7721	-8.81045e+06	3.70996e+06	376.909	-8.20949	54169
7723	-8.68777e+06	3.75284e+06	471.274	-9.0509	51703
7724	-8.77148e+06	3.68125e+06	389.272	-7.89122	54577
7725	-8.75324e+06	3.73502e+06	458.503	-9.00713	52651
7726	-8.75226e+06	3.74936e+06	470.853	-9.467	51682
7727	-8.7543e+06	3.70786e+06	436.888	-8.46629	53506
7729	-8.73219e+06	3.67189e+06	434.104	-7.5597	54473
7730	-8.76056e+06	3.66165e+06	422.098	-7.49007	54656
7732	-8.72256e+06	3.72881e+06	483.575	-8.96506	52342
7733	-8.75324e+06	3.73502e+06	458.503	-9.00713	52651
7735	-8.64444e+06	3.74387e+06	424.29	-8.72715	52502
7736	-8.59917e+06	3.74591e+06	446.771	-9.14884	51961
7737	-8.59597e+06	3.70515e+06	451.052	-8.8565	52717
7738	-8.63283e+06	3.70185e+06	432.041	-8.54247	52052
7739	-8.68026e+06	3.70294e+06	431.623	-7.85256	53204
7743	-8.49404e+06	3.73602e+06	0	0	0
7744	-8.5508e+06	3.71e+06	440.463	-8.58077	52443
7745	-8.49401e+06	3.73428e+06	0	0	0
7746	-8.55281e+06	3.75442e+06	451.877	-9.12325	52004
7748	-8.50995e+06	3.73439e+06	423.667	-8.40134	52946
7749	-8.4264e+06	3.7259e+06	428.653	-8.15549	52556
7751	-8.4686e+06	3.74162e+06	494.399	-8.76496	51487
7752	-8.3143e+06	3.7267e+06	416.913	-7.96701	52254
7753	-8.35504e+06	3.73263e+06	402.259	-8.34144	51287
7754	-8.26605e+06	3.72655e+06	325.501	-8.07299	52353
7755	-8.27971e+06	3.75453e+06	373.207	-8.64018	51483
7756	-8.22186e+06	3.7468e+06	281.714	-8.58302	51939
7757	-8.14163e+06	3.6757e+06	394.075	-6.91406	54257
7758	-8.19042e+06	3.68457e+06	314.772	-7.31721	53644
7759	-8.13177e+06	3.70932e+06	412.215	-7.91114	52741
7760	-8.09699e+06	3.75424e+06	222.145	-8.88261	51233
7761	-8.06779e+06	3.66087e+06	241.485	-5.82748	55848
7762	-8.06406e+06	3.75223e+06	193.522	-8.63822	51786
7763	-8.0342e+06	3.75093e+06	161.29	-8.12169	52505
7764	-8.09486e+06	3.70535e+06	294.707	-7.08043	53926
7765	-8.00773e+06	3.67947e+06	177.64	-5.95637	55506
7766	-8.00343e+06	3.71316e+06	169.042	-6.75016	54343
7767	-7.97218e+06	3.68372e+06	193.309	-6.15908	54765
7768	-7.94796e+06	3.66352e+06	167.486	-5.54434	55471
7769	-7.87796e+06	3.69577e+06	51.712	-5.38783	56378
7770	-1.06806e+07	3.86241e+06	-500.454	-12.0693	39615
7771	-1.07005e+07	3.81402e+06	-503.177	-11.2165	40685
7772	-9.40509e+06	3.7732e+06	-279.457	-11.4743	51646
7773	-9.43615e+06	3.81192e+06	-283.098	-12.7911	49073
7774	-9.37189e+06	3.87755e+06	-269.875	-12.8595	50084
7775	-9.31228e+06	3.77208e+06	-182.271	-10.5148	52535
7776	-9.26268e+06	3.802e+06	-79.1497	-11.1873	50949
7777	-9.17824e+06	3.77933e+06	-14.1567	-10.6523	51089
7778	-9.22867e+06	3.85783e+06	-26.8803	-12.4765	48688
7779	-9.12893e+06	3.836e+06	28.7006	-11.6777	49298
7780	-8.98239e+06	3.84849e+06	185.33	-11.4281	49647
7781	-8.99121e+06	3.78093e+06	248.986	-10.2609	50908
7782	-9.02708e+06	3.83034e+06	168.592	-11.1764	49777
7783	-8.93817e+06	3.8723e+06	237.7	-11.7607	48788
7784	-8.93073e+06	3.83394e+06	264.151	-10.971	50181
7785	-8.92845e+06	3.79063e+06	312.874	-10.246	51289
7786	-8.877e+06	3.77687e+06	416.615	-9.68439	51877
7788	-8.89201e+06	3.84305e+06	297.153	-11.0627	49901
7789	-8.811e+06	3.78711e+06	457.457	-9.48067	51393
7790	-8.81416e+06	3.82159e+06	406.859	-9.95573	50727
7791	-8.78362e+06	3.84895e+06	348.9	-11.4076	48033
7792	-8.86184e+06	3.84196e+06	332.334	-10.798	50123
7793	-8.73973e+06	3.79868e+06	468.463	-10.7092	49019
7794	-8.69412e+06	3.82923e+06	480.617	-11.3887	48861
7795	-8.72667e+06	3.86356e+06	399.607	-11.5518	47936
7796	-8.72236e+06	3.78833e+06	475.478	-10.426	49597
7797	-8.77198e+06	3.87528e+06	300.064	-11.9962	47227
7798	-8.76103e+06	3.78808e+06	469.32	-10.2058	49850
7799	-8.69366e+06	3.78498e+06	484.412	-9.97933	50696
7800	-8.77042e+06	3.82136e+06	424.45	-10.7893	48992
7801	-8.60353e+06	3.83734e+06	368.15	-10.7333	49245
7802	-8.66672e+06	3.83085e+06	456.478	-11.1258	49289
7803	-8.67614e+06	3.86908e+06	426.994	-11.9291	47586
7804	-8.63604e+06	3.7921e+06	418.952	-9.8483	51144
7805	-8.66659e+06	3.79437e+06	435.35	-9.74161	51689
7806	-8.61224e+06	3.78957e+06	403.727	-10.025	50919
7807	-8.64053e+06	3.83822e+06	421.957	-11.13	48952
7808	-8.55255e+06	3.79286e+06	451.322	-9.67961	50827
7809	-8.55853e+06	3.83949e+06	385.744	-10.6388	48698
7810	-8.58607e+06	3.78793e+06	414.608	-9.81448	50983
7811	-8.55828e+06	3.86307e+06	370.164	-11.1089	48032
7812	-8.42411e+06	3.87727e+06	358.087	-11.5671	48019
7813	-8.293e+06	3.85869e+06	321.122	-11.5283	47343
7814	-8.05912e+06	3.81908e+06	120.77	-10.163	49392
7815	-8.03073e+06	3.79914e+06	130.1	-9.55927	50386
7816	-8.04992e+06	3.78606e+06	154.043	-9.26663	50777
7817	-8.0902e+06	3.82957e+06	147.976	-10.3151	48971
7818	-7.82361e+06	3.87483e+06	129.495	-8.6189	51793
7819	-7.85996e+06	3.85652e+06	115.511	-8.36281	52049
7820	-7.88747e+06	3.85203e+06	105.166	-8.54109	51798
7821	-7.83871e+06	3.82136e+06	129.461	-7.68234	52814
7822	-7.85132e+06	3.82163e+06	134.294	-7.68234	52754
7824	-1.04707e+07	3.96153e+06	-408.243	-17.2829	30539
7825	-1.0447e+07	3.95507e+06	-378.544	-17.5276	29277
7826	-1.0447e+07	3.95507e+06	-378.544	-17.5276	29277
7827	-1.0447e+07	3.96369e+06	-314.009	-18.1114	27290
7828	-1.03079e+07	3.91568e+06	-651.782	-15.3106	37869
7829	-1.02011e+07	3.94565e+06	-274.636	-18.5755	27471
7830	-9.97814e+06	3.96431e+06	-514.646	-15.667	38757
7831	-9.47646e+06	3.90364e+06	-243.44	-14.0508	46699
7832	-9.33775e+06	3.96119e+06	-217.952	-12.782	50635
7833	-9.20301e+06	3.96282e+06	77.8845	-14.1087	45853
7834	-9.14792e+06	3.93076e+06	101.782	-13.4574	46466
7835	-9.16054e+06	3.95776e+06	114.239	-13.8691	45705
7836	-9.14279e+06	3.88969e+06	86.386	-12.8512	47276
7837	-9.09932e+06	3.89593e+06	101.025	-12.4034	48007
7838	-9.04423e+06	3.88496e+06	121.911	-11.9331	48596
7839	-8.97858e+06	3.91605e+06	191.236	-12.6268	47408
7840	-9.0314e+06	3.95192e+06	144.208	-13.017	46733
7841	-9.00515e+06	3.88842e+06	150.685	-12.0723	48393
7842	-9.05812e+06	3.94096e+06	124.923	-12.7062	47542
7843	-9.00512e+06	3.95441e+06	181.713	-13.2146	46287
7844	-8.93752e+06	3.93565e+06	269.284	-13.154	46513
7845	-8.89097e+06	3.93442e+06	263.859	-12.6972	47517
7847	-8.93752e+06	3.93565e+06	269.284	-13.154	46513
7848	-8.93656e+06	3.93781e+06	267.154	-13.3729	46296
7849	-8.89176e+06	3.93002e+06	263.859	-12.6972	47517
7850	-8.94621e+06	3.93457e+06	255.507	-13.1161	46502
7851	-8.94072e+06	3.94363e+06	255.028	-13.2982	46239
7852	-8.91317e+06	3.96769e+06	276.174	-13.6975	45819
7854	-8.88828e+06	3.88771e+06	279.788	-12.0459	48391
7855	-8.97269e+06	3.96645e+06	223.433	-13.5536	45724
7856	-8.93017e+06	3.91038e+06	266.366	-12.6897	47143
7857	-8.85742e+06	3.9667e+06	314.424	-13.2971	46581
7858	-8.80368e+06	3.91843e+06	273.892	-12.3442	47898
7859	-8.84516e+06	3.89326e+06	310.592	-11.9824	48248
7860	-8.85399e+06	3.92349e+06	286.906	-12.514	47780
7861	-8.82397e+06	3.96324e+06	304.017	-13.1758	46826
7862	-8.81213e+06	3.87854e+06	289.003	-11.781	48225
7863	-8.80296e+06	3.95767e+06	295.799	-13.1419	47221
7864	-8.72657e+06	3.90683e+06	338.453	-11.934	47918
7865	-8.68703e+06	3.94684e+06	358.183	-13.0428	46225
7866	-8.59869e+06	3.92216e+06	425.955	-13.1196	44995
7867	-8.6399e+06	3.92214e+06	443.638	-13.3412	44746
7868	-8.59889e+06	3.88036e+06	401.123	-11.9747	46811
7869	-8.63564e+06	3.88003e+06	425.091	-12.2767	46622
7870	-8.63776e+06	3.95969e+06	419.166	-13.8417	44297
7871	-8.59879e+06	3.95964e+06	444.416	-14.0015	43912
7872	-8.67857e+06	3.90673e+06	385.645	-12.4885	46924
7873	-8.55453e+06	3.92208e+06	393.085	-12.5614	46129
7874	-8.55746e+06	3.88262e+06	376.421	-11.698	47269
7875	-8.55307e+06	3.96004e+06	406.122	-13.5379	45227
7876	-8.50949e+06	3.9425e+06	351.93	-12.857	46402
7877	-8.50076e+06	3.95405e+06	346.872	-13.1908	45868
7878	-8.45465e+06	3.96e+06	358.896	-12.8958	46327
7879	-8.48609e+06	3.97066e+06	353.326	-13.5257	45301
7880	-8.45863e+06	3.97014e+06	345.663	-13.2154	45914
7881	-8.40655e+06	3.98594e+06	366.094	-13.5197	45207
7882	-8.46836e+06	3.89948e+06	358.903	-12.1043	47466
7884	-8.43309e+06	3.89303e+06	348.991	-11.7446	48017
7885	-8.48208e+06	3.96207e+06	345.245	-13.2933	45754
7886	-8.35971e+06	3.93697e+06	314.443	-12.3458	47112
7887	-8.36734e+06	3.92221e+06	292.06	-11.9534	47863
7888	-8.31115e+06	3.9432e+06	331.723	-12.3944	46505
7889	-8.31243e+06	3.9519e+06	367.259	-12.8479	45507
7890	-8.0244e+06	3.89706e+06	93.2987	-11.2454	48437
7891	-8.07582e+06	3.96525e+06	98.325	-12.3415	46332
7892	-8.07285e+06	3.92791e+06	85.5153	-12.0416	47107
7893	-7.81771e+06	3.92541e+06	171.275	-9.8145	49771
7894	-7.84963e+06	3.98529e+06	136.524	-10.9231	47856
7895	-7.82919e+06	3.96252e+06	175.476	-10.6695	47968
7896	-7.78582e+06	3.91655e+06	0	0	0
7897	-7.78181e+06	3.96955e+06	222.545	-11.1673	46981
7900	-1.12889e+07	3.98627e+06	-666.486	-5.39496	43644
7901	-1.12889e+07	3.98627e+06	-666.486	-5.39496	43644
7902	-1.12889e+07	3.98627e+06	-666.486	-5.39496	43644
7903	-1.08538e+07	4.02301e+06	-1087.2	-6.24352	61027
7904	-1.07022e+07	4.08469e+06	-212.839	-17.408	30271
7905	-1.07077e+07	4.07948e+06	-234.504	-16.7212	31685
7906	-1.06924e+07	4.07153e+06	-389.369	-15.0929	37215
7907	-1.04607e+07	4.085e+06	-51.3854	-23.8724	16349
7909	-1.04437e+07	3.99057e+06	-203.936	-19.6504	23693
7910	-1.0175e+07	4.06543e+06	-269.793	-20.7768	24287
7911	-9.41479e+06	4.02165e+06	-183.976	-14.8451	46009
7912	-9.27091e+06	3.99945e+06	45.1238	-14.9155	45088
7913	-9.10308e+06	3.9939e+06	157.135	-14.0924	45020
7914	-9.09245e+06	4.06119e+06	199.65	-15.0921	43396
7915	-8.99508e+06	4.00935e+06	248.125	-14.2347	44793
7916	-9.03214e+06	4.01154e+06	217.917	-14.1631	44862
7917	-9.00245e+06	4.05762e+06	317.189	-14.5514	44907
7918	-8.89487e+06	4.08187e+06	289.637	-15.1383	44121
7919	-8.89298e+06	4.0359e+06	284.609	-14.4989	44821
7920	-8.94013e+06	4.08956e+06	301.56	-15.212	43950
7921	-8.93409e+06	4.00455e+06	247.607	-14.2544	45036
7922	-8.9247e+06	4.04561e+06	267.132	-14.6545	44716
7923	-8.85107e+06	4.08812e+06	290.087	-15.3703	43624
7924	-8.80527e+06	4.07515e+06	336.604	-15.6861	43405
7925	-8.80898e+06	4.01484e+06	315.121	-14.382	45516
7926	-8.84942e+06	4.0494e+06	311.87	-14.9487	44175
7927	-8.85476e+06	4.00674e+06	316.566	-14.1713	45422
7928	-8.71248e+06	4.04495e+06	345.243	-14.545	45293
7929	-8.70033e+06	4.08734e+06	404.225	-16.0611	42571
7930	-8.73431e+06	4.00047e+06	356.002	-13.7725	46678
7931	-8.77519e+06	4.01689e+06	313.535	-14.44	45901
7932	-8.67605e+06	4.03447e+06	378.337	-14.4247	44353
7933	-8.5907e+06	3.99628e+06	471.472	-14.7753	42964
7934	-8.61453e+06	4.05189e+06	457.828	-15.6258	42023
7935	-8.66458e+06	4.06872e+06	434.555	-15.6045	42521
7936	-8.64329e+06	3.99582e+06	418.488	-14.4192	43733
7937	-8.64603e+06	4.03957e+06	429.664	-15.1669	42912
7938	-8.61163e+06	4.02328e+06	459.337	-15.2247	42462
7939	-8.49891e+06	4.01671e+06	388.986	-14.296	44010
7940	-8.53366e+06	4.03674e+06	411.673	-14.5152	43785
7941	-8.53761e+06	4.08142e+06	429.91	-15.0351	43001
7942	-8.5757e+06	4.03196e+06	423.385	-15.1179	43230
7943	-8.54581e+06	3.99818e+06	403.439	-14.271	44310
7944	-8.58226e+06	4.0848e+06	463.148	-15.9774	41553
7945	-8.56547e+06	4.05603e+06	421.192	-15.0472	43318
7946	-8.48152e+06	4.02593e+06	386.217	-14.4105	43697
7947	-8.40744e+06	3.99835e+06	390.646	-14.0855	44035
7948	-8.43949e+06	4.0157e+06	372.376	-13.9718	44483
7949	-8.46359e+06	4.02061e+06	370.478	-14.2563	43992
7951	-8.44484e+06	4.01715e+06	383.383	-14.2745	43936
7952	-8.43995e+06	4.0066e+06	361.922	-13.7399	44905
7953	-8.48152e+06	4.02593e+06	386.217	-14.4105	43697
7954	-8.46359e+06	4.0207e+06	370.478	-14.2563	43992
7955	-8.40623e+06	3.99051e+06	378.419	-13.8292	44633
7956	-8.40744e+06	3.99835e+06	390.646	-14.0855	44035
7957	-8.14992e+06	4.07069e+06	323.174	-15.367	40474
7958	-8.17094e+06	3.99093e+06	341.836	-13.7236	42962
7959	-8.01627e+06	4.08044e+06	262.843	-14.2039	42343
7960	-8.05594e+06	4.04974e+06	248.416	-14.1873	42202
7961	-8.04368e+06	4.08798e+06	309.454	-14.5293	41719
7962	-7.9555e+06	4.07104e+06	199.73	-14.1557	42364
7963	-7.94128e+06	4.08237e+06	208.001	-14.4556	41826
7964	-7.90906e+06	4.06862e+06	221.797	-14.0843	42471
7965	-7.8203e+06	4.00973e+06	152.81	-11.4107	47007
7966	-7.877e+06	4.04475e+06	209.884	-12.2562	45924
7967	-7.84148e+06	4.08233e+06	218.792	-13.23	44270
7968	-7.85758e+06	4.01457e+06	134.236	-11.4517	47163
7969	-7.79597e+06	4.03358e+06	179.831	-12.1197	45907
7970	-7.79425e+06	4.05847e+06	184.036	-12.7404	44711
7971	-7.7399e+06	4.05741e+06	213.438	-12.7457	44515
7972	-7.75577e+06	4.0842e+06	194.056	-13.0828	43864
7973	-7.651e+06	4.03066e+06	264.457	-11.6288	46799
7974	-7.71411e+06	4.00721e+06	240.145	-11.5633	46549
7975	-7.62012e+06	4.08354e+06	267.468	-12.6255	45351
7982	-1.12889e+07	4.09309e+06	-480.486	-9.90001	39512
7983	-1.10959e+07	4.09309e+06	-1139.93	-7.29499	59955
7984	-1.08599e+07	4.15609e+06	-257.288	-18.0367	27713
7985	-1.03177e+07	4.09483e+06	-459.58	-19.8536	29207
7986	-1.01103e+07	4.1842e+06	-407.193	-18.5033	30478
7987	-9.9844e+06	4.09505e+06	-418.187	-17.6631	34739
7988	-9.62405e+06	4.1238e+06	-341.837	-17.7484	42155
7989	-9.50038e+06	4.16248e+06	-244.723	-17.6855	41787
7990	-9.36185e+06	4.14381e+06	-10.8171	-17.0475	42190
7991	-9.36618e+06	4.14457e+06	-10.8171	-17.0475	42190
7992	-9.33693e+06	4.09578e+06	-12.9592	-15.8185	44119
7993	-9.32965e+06	4.16962e+06	65.5964	-18.0087	40623
7994	-9.23845e+06	4.19081e+06	158.304	-17.5783	41409
7995	-9.09132e+06	4.14337e+06	474.656	-17.5869	37943
7996	-9.14365e+06	4.1051e+06	271.926	-16.1387	41571
7997	-9.07584e+06	4.18382e+06	375.862	-17.5886	39111
7998	-8.98808e+06	4.15377e+06	326.33	-16.2597	41794
7999	-9.01248e+06	4.19844e+06	257.357	-16.908	41356
8000	-8.99025e+06	4.0988e+06	313.563	-15.1751	44093
8001	-9.03692e+06	4.15089e+06	357.012	-16.5703	40944
8002	-9.0687e+06	4.10262e+06	315.584	-15.8644	41880
8003	-8.90673e+06	4.17451e+06	293.411	-16.6577	42449
8004	-8.91759e+06	4.12356e+06	297.41	-15.6331	43595
8005	-8.96793e+06	4.12702e+06	312.723	-15.7977	42908
8006	-8.96686e+06	4.19311e+06	277.831	-16.9841	41003
8007	-8.94183e+06	4.16169e+06	290.588	-16.438	42201
8008	-8.83402e+06	4.18056e+06	325.811	-17.5605	41010
8009	-8.81656e+06	4.12371e+06	324.822	-16.4587	42281
8010	-8.86989e+06	4.12163e+06	296.848	-15.6824	43348
8011	-8.71147e+06	4.12012e+06	403.683	-16.6954	41862
8012	-8.74139e+06	4.11698e+06	351.532	-16.6392	42557
8013	-8.59083e+06	4.11722e+06	493.135	-17.0833	39910
8014	-8.65631e+06	4.09647e+06	469.129	-16.2721	41235
8015	-8.67861e+06	4.13159e+06	477.692	-16.9085	40549
8016	-8.60532e+06	4.17944e+06	509.869	-17.8055	38719
8017	-8.63412e+06	4.1311e+06	489.397	-16.9743	39870
8018	-8.58768e+06	4.14495e+06	496.412	-17.2954	39637
8019	-8.68299e+06	4.18557e+06	388.461	-16.5423	42150
8020	-8.67799e+06	4.16221e+06	428.09	-16.7316	41400
8021	-8.63644e+06	4.17451e+06	523.766	-17.6315	38567
8022	-8.54083e+06	4.15801e+06	499.567	-17.4311	39434
8023	-8.5464e+06	4.18579e+06	507.45	-17.6319	39339
8024	-8.55652e+06	4.12373e+06	469.294	-16.5196	40744
8025	-8.51427e+06	4.17141e+06	509.208	-17.4671	38940
8026	-8.34633e+06	4.11527e+06	563.649	-16.8771	37528
8027	-8.29782e+06	4.1745e+06	611.404	-17.7323	36253
8028	-8.26456e+06	4.10812e+06	526.121	-16.7477	37870
8029	-8.22992e+06	4.17038e+06	616.765	-18.3265	35351
8030	-8.2145e+06	4.1884e+06	517.996	-18.0508	36625
8031	-8.12137e+06	4.1397e+06	750.757	-17.726	34051
8032	-8.18582e+06	4.11837e+06	475.351	-16.8379	37511
8033	-8.15061e+06	4.11902e+06	515.995	-16.8259	36830
8034	-8.10506e+06	4.1539e+06	850.942	-17.8022	33350
8035	-8.04709e+06	4.1862e+06	1032.01	-18.1271	31243
8036	-8.01487e+06	4.1728e+06	644.076	-15.9185	36706
8037	-8.08757e+06	4.12657e+06	544.418	-16.1165	37322
8038	-8.08097e+06	4.16137e+06	952.915	-18.0718	32156
8039	-7.92428e+06	4.10967e+06	250.837	-15.1245	40336
8040	-7.9929e+06	4.10529e+06	241.348	-14.2065	42538
8041	-7.95559e+06	4.11719e+06	250.364	-14.9022	40962
8042	-7.94766e+06	4.18745e+06	444.509	-16.2256	37330
8043	-7.98172e+06	4.18698e+06	498.464	-16.1623	36981
8044	-7.97345e+06	4.14815e+06	343.529	-14.9257	40624
8045	-8.00442e+06	4.13054e+06	343.426	-14.6102	41318
8046	-7.87325e+06	4.12373e+06	225.979	-13.9866	42914
8047	-7.87488e+06	4.16636e+06	242.291	-14.6577	41525
8048	-7.83304e+06	4.19553e+06	260.832	-15.3535	40639
8049	-7.83068e+06	4.16627e+06	230.211	-15.0467	41151
8050	-7.82751e+06	4.13505e+06	198.261	-14.928	41510
8051	-7.91098e+06	4.1915e+06	338.471	-15.5646	39491
8052	-7.88568e+06	4.09365e+06	238.23	-14.1309	42483
8053	-7.77562e+06	4.12902e+06	254.812	-15.6265	39350
8054	-7.81539e+06	4.09309e+06	212.265	-13.6351	43522
8055	-7.74336e+06	4.10988e+06	213.901	-13.8964	42536
8056	-7.77036e+06	4.19742e+06	301.002	-16.0961	38210
8057	-7.78686e+06	4.16572e+06	288.825	-16.1281	38675
8058	-7.80638e+06	4.09638e+06	213.032	-13.8279	42982
8059	-7.72877e+06	4.19601e+06	313.636	-16.0889	38260
8060	-7.71459e+06	4.12826e+06	199.614	-13.6136	43517
8061	-7.63275e+06	4.16084e+06	213.278	-14.5729	41936
8062	-7.66876e+06	4.18202e+06	258.108	-15.472	39948
8063	-7.65735e+06	4.10164e+06	189.619	-12.7666	45259
8064	-7.68785e+06	4.15677e+06	209.897	-14.4354	42385
8065	-7.59011e+06	4.12069e+06	284.962	-13.3795	43828
8066	-7.54729e+06	4.09718e+06	406.291	-12.8869	44052
8067	-7.57957e+06	4.15864e+06	274.332	-14.1849	42494
8068	-7.5129e+06	4.11242e+06	376.592	-12.2919	45159
8069	-7.51507e+06	4.14712e+06	329.373	-12.9461	44259
8070	-7.46931e+06	4.16866e+06	331.09	-13.1418	43729
8071	-7.51965e+06	4.19198e+06	323.461	-14.3107	41985
8072	-7.38162e+06	4.18568e+06	371.727	-12.2539	44491
8073	-1.07841e+07	4.28594e+06	-120.427	-23.7668	19216
8074	-1.06443e+07	4.23926e+06	-355.849	-24.0364	24535
8075	-1.05641e+07	4.23885e+06	-312.049	-24.323	22995
8076	-1.04456e+07	4.25962e+06	-170.828	-25.8748	18587
8077	-1.03094e+07	4.27058e+06	-108.29	-24.0868	20550
8078	-1.02573e+07	4.289e+06	-146.575	-24.373	21163
8079	-1.02254e+07	4.25185e+06	-275.955	-21.4344	23895
8080	-1.01144e+07	4.24787e+06	-195.949	-22.268	23205
8081	-9.55265e+06	4.26515e+06	-225.406	-19.7618	38219
8082	-9.39921e+06	4.25606e+06	-81.803	-19.1589	39933
8083	-9.39086e+06	4.21973e+06	-81.0159	-18.6315	40384
8084	-9.2986e+06	4.29282e+06	50.0848	-19.4952	39615
8085	-9.35386e+06	4.21985e+06	-0.473814	-18.7782	39976
8086	-9.20281e+06	4.2624e+06	146.983	-18.7017	40170
8087	-9.09628e+06	4.21955e+06	251.914	-18.1149	39974
8088	-9.09348e+06	4.25928e+06	270.397	-19.3283	37289
8089	-9.09039e+06	4.30152e+06	291.951	-20.1791	35277
8090	-9.16609e+06	4.29322e+06	237.864	-19.3204	37960
8091	-9.05928e+06	4.25228e+06	243.615	-18.688	38501
8092	-8.97667e+06	4.24541e+06	268.71	-17.9024	39412
8093	-9.04198e+06	4.22122e+06	251.938	-17.4625	40395
8094	-8.99475e+06	4.29447e+06	352.99	-19.4368	35737
8095	-8.94459e+06	4.29445e+06	340.383	-19.4835	36329
8096	-8.9438e+06	4.22629e+06	246.121	-17.496	40541
8097	-8.89155e+06	4.28878e+06	347.582	-19.8794	36326
8098	-8.90909e+06	4.21411e+06	279.091	-17.2696	41147
8099	-8.92682e+06	4.25946e+06	329.468	-18.8535	37673
8100	-8.87953e+06	4.25542e+06	342.929	-18.8095	38344
8101	-8.83488e+06	4.27643e+06	343.736	-19.2692	38451
8102	-8.85221e+06	4.22538e+06	323.054	-18.1053	40300
8103	-8.68902e+06	4.2785e+06	284.328	-18.2884	39758
8104	-8.7582e+06	4.23011e+06	312.83	-18.0077	40730
8105	-8.74473e+06	4.28516e+06	277.257	-18.4378	40107
8106	-8.75587e+06	4.20095e+06	329.435	-17.5999	41168
8107	-8.71407e+06	4.22096e+06	299.701	-17.0874	42089
8108	-8.66037e+06	4.25018e+06	360.79	-18.2254	39754
8109	-8.62716e+06	4.21846e+06	443.336	-18.0535	39140
8110	-8.67337e+06	4.218e+06	331.396	-16.9925	42054
8111	-8.64853e+06	4.27781e+06	348.103	-18.6915	38662
8112	-8.50099e+06	4.262e+06	546.078	-19.5185	36077
8113	-8.50877e+06	4.21916e+06	531.259	-18.549	37493
8114	-8.47024e+06	4.22339e+06	623.853	-19.3884	34793
8115	-8.44205e+06	4.25327e+06	601.468	-19.7871	34567
8116	-8.40167e+06	4.26307e+06	529.614	-19.5303	35317
8117	-8.3072e+06	4.21456e+06	673.456	-18.7543	34617
8118	-8.37181e+06	4.24757e+06	551.273	-19.6455	34882
8119	-8.33801e+06	4.28673e+06	502.15	-19.3366	35645
8120	-8.38458e+06	4.29198e+06	440.495	-19.5283	35844
8121	-8.34202e+06	4.25243e+06	578.332	-19.2392	35170
8122	-8.2175e+06	4.21773e+06	516.205	-18.4154	36066
8123	-8.27082e+06	4.23975e+06	698.216	-19.6414	32631
8124	-8.26022e+06	4.21206e+06	627.727	-18.6855	34874
8125	-8.12905e+06	4.24553e+06	556.504	-18.5824	34243
8126	-8.11102e+06	4.21305e+06	871.884	-19.2832	30683
8127	-8.20108e+06	4.29796e+06	678.825	-20.9092	30585
8128	-8.19343e+06	4.26232e+06	550.713	-19.2193	34034
8129	-8.15459e+06	4.21192e+06	666.934	-18.7149	33060
8130	-8.15531e+06	4.28715e+06	518.359	-19.3276	34268
8131	-8.0223e+06	4.22884e+06	1059.75	-21.0948	24823
8132	-8.09767e+06	4.27047e+06	471.666	-19.1078	33899
8133	-8.09881e+06	4.30222e+06	447.637	-19.3186	34078
8134	-8.05862e+06	4.28043e+06	492.489	-19.5859	32158
8135	-8.08128e+06	4.20479e+06	1093.53	-19.7593	28597
8136	-8.08871e+06	4.23523e+06	980.661	-20.3921	28188
8137	-7.94179e+06	4.29291e+06	611.092	-21.6578	25162
8138	-7.98053e+06	4.28829e+06	405.863	-21.2785	27250
8139	-7.95829e+06	4.23394e+06	701.148	-19.1978	29436
8140	-7.98879e+06	4.21947e+06	979.047	-20.5831	25758
8141	-7.91654e+06	4.26998e+06	550.442	-18.1987	33126
8142	-8.00628e+06	4.25652e+06	844.711	-21.6382	24145
8143	-7.92791e+06	4.22775e+06	548.858	-17.5093	34352
8144	-7.86814e+06	4.29825e+06	433.609	-18.7213	31830
8145	-7.86903e+06	4.23385e+06	358.953	-16.0325	38447
8146	-7.83608e+06	4.26799e+06	310.408	-17.0454	36499
8147	-7.83246e+06	4.29489e+06	335.957	-17.753	34786
8148	-7.87548e+06	4.20374e+06	298.966	-15.3342	40142
8149	-7.83289e+06	4.22966e+06	285.313	-16.1312	38788
8150	-7.88346e+06	4.27675e+06	449.091	-17.1937	35265
8151	-7.83689e+06	4.24936e+06	298.325	-16.5892	37669
8152	-7.76935e+06	4.26517e+06	255.887	-17.2809	36259
8153	-7.80312e+06	4.28317e+06	287.551	-17.4771	35971
8154	-7.79929e+06	4.2247e+06	240.65	-16.25	39028
8155	-7.74334e+06	4.23141e+06	298.655	-16.5729	37271
8156	-7.77203e+06	4.23928e+06	249.346	-16.8064	37332
8157	-7.77127e+06	4.29571e+06	259.77	-17.7319	35714
8158	-7.73936e+06	4.28161e+06	260.313	-17.712	35737
8159	-7.69445e+06	4.19899e+06	301.06	-16.2619	38223
8160	-7.70952e+06	4.23319e+06	305.899	-16.7455	37131
8161	-7.66921e+06	4.23104e+06	296.473	-16.7152	37285
8162	-7.70023e+06	4.27297e+06	282.973	-17.6015	35934
8163	-7.63904e+06	4.2485e+06	278.347	-16.7953	37184
8164	-7.6473e+06	4.27201e+06	289.437	-17.3541	36311
8165	-7.56117e+06	4.25299e+06	329.181	-15.9962	37886
8166	-7.58869e+06	4.28119e+06	248.942	-17.0241	36755
8167	-7.60589e+06	4.20355e+06	262.512	-15.465	40136
8168	-7.60934e+06	4.2375e+06	271.212	-16.2469	38134
8169	-7.52638e+06	4.23662e+06	310.355	-15.2429	40299
8170	-7.49545e+06	4.24958e+06	316.689	-15.8131	38844
8171	-7.51812e+06	4.27234e+06	297.146	-16.4539	37602
8172	-7.49147e+06	4.22399e+06	342.866	-15.1721	40015
8173	-7.43736e+06	4.2113e+06	0	0	0
8174	-7.48699e+06	4.29408e+06	286.75	-16.963	37336
8175	-7.52479e+06	4.29973e+06	303.562	-17.742	35876
8176	-7.46476e+06	4.19996e+06	346.763	-13.9927	42058
8177	-7.46579e+06	4.26047e+06	320.451	-15.7405	38866
8178	-7.43936e+06	4.28675e+06	317.457	-15.8335	38679
8179	-7.34889e+06	4.28955e+06	335.741	-14.5281	39976
8181	-7.39737e+06	4.21444e+06	0	0	0
8182	-7.34774e+06	4.2412e+06	380.374	-13.3317	42112
8185	-1.04517e+07	4.35598e+06	-402.586	-24.9665	25958
8186	-1.02948e+07	4.35563e+06	67.2724	-28.356	15049
8187	-1.00961e+07	4.36561e+06	-204.276	-24.0494	22537
8188	-1.01252e+07	4.30487e+06	-76.4007	-24.4646	18841
8189	-9.98351e+06	4.35216e+06	-261.975	-22.0441	25955
8190	-9.18721e+06	4.38141e+06	212.282	-20.9658	36835
8191	-9.18903e+06	4.33404e+06	181.628	-19.8771	38234
8192	-9.14793e+06	4.39003e+06	240.102	-21.031	36349
8193	-9.09459e+06	4.33797e+06	287.489	-20.2706	35717
8194	-9.10383e+06	4.3673e+06	284.994	-21.0518	35272
8195	-9.1017e+06	4.39654e+06	292.396	-21.6453	34553
8196	-9.14714e+06	4.34588e+06	264.087	-20.2478	36564
8197	-9.10348e+06	4.38656e+06	290.734	-21.4131	34822
8198	-9.04299e+06	4.30427e+06	323.535	-19.7045	35360
8199	-8.98218e+06	4.33545e+06	349.986	-19.9613	35457
8200	-9.05427e+06	4.36292e+06	281.75	-20.1267	35777
8201	-9.02552e+06	4.33789e+06	300.592	-19.748	35986
8202	-9.00024e+06	4.37218e+06	308.226	-20.6758	35197
8203	-9.01811e+06	4.37941e+06	299.097	-20.83	35029
8204	-8.99131e+06	4.40293e+06	316.617	-21.6786	33940
8205	-8.97669e+06	4.37062e+06	322.16	-20.927	34798
8206	-9.05345e+06	4.3766e+06	289.654	-20.5032	35359
8207	-8.94234e+06	4.33022e+06	336.047	-20.3094	35424
8208	-8.91959e+06	4.37022e+06	344.105	-21.6167	33670
8209	-8.92468e+06	4.39862e+06	342.275	-22.3115	32741
8210	-8.90953e+06	4.33263e+06	337.335	-20.7154	35108
8211	-8.82671e+06	4.31895e+06	360.756	-20.7629	35439
8212	-8.81907e+06	4.37407e+06	375.149	-22.5855	32256
8213	-8.86587e+06	4.38291e+06	366.714	-22.6335	31961
8214	-8.79135e+06	4.30746e+06	341.447	-19.4379	38145
8215	-8.86815e+06	4.31281e+06	350.596	-20.5673	35421
8216	-8.84683e+06	4.36601e+06	371.259	-22.5557	32226
8217	-8.81306e+06	4.39169e+06	371.056	-22.7831	32145
8218	-8.81016e+06	4.38656e+06	375.786	-22.5917	32339
8219	-8.78296e+06	4.33839e+06	368.719	-20.276	36446
8220	-8.81306e+06	4.39169e+06	371.056	-22.7831	32145
8221	-8.85927e+06	4.34263e+06	365.826	-21.7358	33398
8222	-8.72267e+06	4.37682e+06	357.474	-21.1662	35901
8223	-8.71078e+06	4.39477e+06	370.256	-21.6541	34926
8224	-8.76736e+06	4.37108e+06	392.284	-21.6714	34174
8225	-8.69243e+06	4.331e+06	315.268	-19.6437	38376
8226	-8.77695e+06	4.40007e+06	376.942	-22.5383	32677
8227	-8.72443e+06	4.34193e+06	331.249	-20.1491	37765
8228	-8.60516e+06	4.36018e+06	397.792	-20.4314	36836
8229	-8.66286e+06	4.32522e+06	325.717	-19.3037	38772
8230	-8.64903e+06	4.35777e+06	348.609	-20.4112	37627
8231	-8.61526e+06	4.3691e+06	373.494	-20.5139	37425
8232	-8.60142e+06	4.3404e+06	413.757	-20.1602	36424
8233	-8.67859e+06	4.39124e+06	367.887	-21.3961	35658
8234	-8.65053e+06	4.36444e+06	348.609	-20.4112	37627
8235	-8.61574e+06	4.38826e+06	354.251	-20.7766	37841
8236	-8.51722e+06	4.36713e+06	484.542	-21.1865	34939
8237	-8.58511e+06	4.39106e+06	388.642	-20.9801	36908
8238	-8.55349e+06	4.37766e+06	440.005	-21.0815	35609
8239	-8.58492e+06	4.37302e+06	412.467	-20.6876	36452
8240	-8.42919e+06	4.31892e+06	506.105	-19.9158	35441
8241	-8.43112e+06	4.35422e+06	452.887	-20.418	35127
8242	-8.47516e+06	4.35465e+06	515.398	-21.0129	34551
8243	-8.46316e+06	4.33225e+06	525.529	-20.4737	34847
8244	-8.34185e+06	4.35135e+06	433.333	-20.1309	35397
8245	-8.3826e+06	4.39148e+06	431.448	-20.9846	34838
8246	-8.32664e+06	4.31935e+06	478.267	-19.6387	35656
8247	-8.33872e+06	4.40519e+06	463.331	-21.171	34421
8248	-8.31619e+06	4.38057e+06	501.319	-20.9401	34180
8249	-8.37353e+06	4.3205e+06	351.435	-19.313	36940
8250	-8.29083e+06	4.40199e+06	525.344	-21.3272	33532
8251	-8.22887e+06	4.33857e+06	605.356	-20.7887	32437
8252	-8.23887e+06	4.38365e+06	551.737	-21.0372	33271
8253	-8.21433e+06	4.3772e+06	561.303	-21.2198	32324
8254	-8.15443e+06	4.34781e+06	583.368	-20.5995	31563
8255	-8.19435e+06	4.34272e+06	623.094	-21.1911	30990
8256	-8.11897e+06	4.34495e+06	596.454	-20.3813	31677
8257	-8.02081e+06	4.37599e+06	507.041	-20.7747	31765
8258	-8.07326e+06	4.37892e+06	517.424	-20.5469	32354
8259	-8.05766e+06	4.33169e+06	462.01	-19.9412	33008
8260	-7.9277e+06	4.3044e+06	585.59	-21.7124	25114
8261	-7.92431e+06	4.33363e+06	474.65	-21.6913	26168
8262	-8.00341e+06	4.34808e+06	390.245	-20.4563	32146
8263	-7.92108e+06	4.39968e+06	417.934	-22.242	27647
8264	-7.97186e+06	4.40343e+06	510.857	-22.256	28240
8265	-7.96991e+06	4.37718e+06	419.958	-21.3347	30157
8266	-7.99351e+06	4.32096e+06	314.503	-20.3829	31463
8267	-7.90445e+06	4.31116e+06	647.931	-22.809	22045
8268	-7.82359e+06	4.39795e+06	430.086	-23.0657	25002
8270	-7.8638e+06	4.34778e+06	579.698	-23.1603	22876
8271	-7.82795e+06	4.3541e+06	520.055	-22.242	25278
8272	-7.89826e+06	4.35034e+06	477.346	-22.2198	25382
8273	-7.83744e+06	4.37038e+06	518.737	-22.993	24157
8274	-7.88264e+06	4.32718e+06	585.474	-22.7473	22921
8275	-7.86687e+06	4.39015e+06	478.278	-23.2931	24137
8276	-7.90813e+06	4.37775e+06	395.175	-21.7985	27741
8277	-7.83137e+06	4.32403e+06	353.693	-18.9159	32410
8278	-7.75394e+06	4.39949e+06	483.89	-22.7256	25402
8279	-7.74369e+06	4.31648e+06	272.415	-18.3114	34899
8280	-7.74641e+06	4.37339e+06	373.24	-20.1005	30922
8281	-7.78975e+06	4.37883e+06	489.247	-22.6422	25406
8282	-7.78518e+06	4.34596e+06	339.65	-18.9129	33152
8283	-7.69739e+06	4.34388e+06	264.24	-18.4378	34727
8284	-7.70775e+06	4.37227e+06	298.099	-18.8805	33566
8285	-7.66086e+06	4.30753e+06	285.575	-18.1779	35110
8286	-7.65474e+06	4.34394e+06	271.914	-18.5223	34886
8287	-7.6985e+06	4.31115e+06	255.919	-18.3703	34982
8288	-7.63381e+06	4.30914e+06	301.179	-18.312	34765
8289	-7.66075e+06	4.38761e+06	274.051	-19.1606	33853
8290	-7.7074e+06	4.40535e+06	305.465	-19.1967	32971
8291	-7.56502e+06	4.34073e+06	294.552	-18.9989	34151
8292	-7.61034e+06	4.30691e+06	228.447	-17.587	36184
8293	-7.55337e+06	4.31114e+06	335.246	-18.6959	34385
8294	-7.54922e+06	4.40061e+06	309.677	-19.7191	32987
8295	-7.62017e+06	4.34355e+06	275.318	-18.7269	34530
8296	-7.56116e+06	4.37358e+06	282.536	-19.248	33973
8297	-7.61646e+06	4.38212e+06	250.774	-19.0307	34330
8298	-7.58927e+06	4.33453e+06	269.987	-18.6329	34636
8299	-7.45441e+06	4.3985e+06	271.059	-18.0554	36080
8300	-7.49277e+06	4.32954e+06	279.26	-18.0746	36084
8301	-7.51229e+06	4.38189e+06	287.462	-19.0479	34517
8302	-7.4678e+06	4.34638e+06	275.361	-17.8583	36451
8303	-7.48372e+06	4.37265e+06	275.521	-18.4268	35630
8304	-7.43973e+06	4.37769e+06	274.177	-17.6426	36445
8305	-7.36275e+06	4.37309e+06	226.5	-16.1566	38055
8306	-7.35823e+06	4.33043e+06	279.086	-15.7716	38339
8307	-7.3729e+06	4.32177e+06	299.586	-15.5114	38571
8308	-7.42588e+06	4.30913e+06	312.739	-16.0355	38102
8309	-7.39453e+06	4.3756e+06	256.729	-16.6668	37409
8310	-7.40158e+06	4.39652e+06	270.938	-17.2173	36817
8311	-7.40079e+06	4.34867e+06	278.13	-16.4592	37552
8312	-7.39106e+06	4.31653e+06	325.6	-15.381	38662
8314	-7.42786e+06	4.34001e+06	285.563	-16.8742	37289
8316	-1.09528e+07	4.4345e+06	-350.446	-22.0247	26852
8317	-1.07962e+07	4.43594e+06	-366.945	-23.5632	25400
8318	-1.07523e+07	4.49497e+06	-247.764	-27.5022	18511
8319	-1.0627e+07	4.46824e+06	-313.831	-26.7569	23771
8320	-1.05947e+07	4.47039e+06	-196.156	-27.2001	21354
8321	-1.03303e+07	4.43366e+06	36.7172	-31.2144	13639
8322	-9.58148e+06	4.49597e+06	-179.288	-23.7281	33438
8323	-9.57982e+06	4.46304e+06	-177.104	-23.1305	34068
8324	-9.46429e+06	4.50377e+06	-82.5814	-23.7432	34560
8325	-9.4687e+06	4.46321e+06	-91.693	-23.359	34802
8326	-9.46318e+06	4.42625e+06	-89.0306	-22.4616	36101
8327	-9.40503e+06	4.42951e+06	-47.7084	-22.4446	36621
8328	-9.40375e+06	4.47571e+06	-52.8095	-23.4403	35289
8329	-9.36451e+06	4.47813e+06	26.9932	-23.2966	35248
8330	-9.28469e+06	4.49543e+06	136.363	-24.0836	34117
8331	-9.34352e+06	4.48558e+06	68.7245	-23.2739	35050
8332	-9.28636e+06	4.42186e+06	155.751	-22.733	35415
8333	-9.28629e+06	4.45265e+06	155.408	-23.2922	34869
8334	-9.34315e+06	4.48484e+06	68.7245	-23.2739	35050
8335	-9.34343e+06	4.42962e+06	56.709	-22.3788	36348
8336	-9.26725e+06	4.47233e+06	162.867	-23.6596	34525
8337	-9.32428e+06	4.49847e+06	101.603	-23.9985	34109
8338	-9.33204e+06	4.43823e+06	81.6788	-22.7036	35664
8339	-9.24764e+06	4.48712e+06	156.49	-24.0908	34038
8340	-9.18939e+06	4.4256e+06	220.251	-22.2595	35716
8341	-9.23777e+06	4.4254e+06	194.707	-22.229	36026
8342	-9.24059e+06	4.44392e+06	203.194	-22.7591	35477
8343	-9.19527e+06	4.46284e+06	200.443	-23.4055	34788
8344	-9.24764e+06	4.48712e+06	156.49	-24.0908	34038
8345	-9.23747e+06	4.49637e+06	163.688	-24.1389	34046
8346	-9.18625e+06	4.49925e+06	201.326	-24.1418	34285
8347	-9.17713e+06	4.4673e+06	218.806	-23.7005	34739
8348	-9.23555e+06	4.44962e+06	198.779	-23.0587	35194
8349	-9.23776e+06	4.46306e+06	182.276	-23.3713	34888
8350	-9.19491e+06	4.42562e+06	220.251	-22.2595	35716
8351	-9.19514e+06	4.49647e+06	190.686	-24.0169	34255
8352	-9.17641e+06	4.47481e+06	218.806	-23.7005	34739
8353	-9.15178e+06	4.4932e+06	230.509	-24.0093	34933
8354	-9.14943e+06	4.47815e+06	236.026	-23.8548	34943
8355	-9.15183e+06	4.45785e+06	247.591	-23.5122	34740
8356	-9.14829e+06	4.47008e+06	242.822	-23.7005	34803
8357	-9.10286e+06	4.45721e+06	322.611	-23.4806	33803
8358	-9.11409e+06	4.42138e+06	280.717	-21.934	34735
8359	-9.13165e+06	4.42339e+06	260.025	-22.0041	35116
8360	-9.10272e+06	4.49262e+06	283.562	-23.9349	34125
8361	-9.13052e+06	4.41186e+06	258.145	-21.6961	35278
8362	-9.10209e+06	4.42669e+06	293.668	-22.0394	34513
8363	-9.1305e+06	4.45706e+06	273.01	-23.4177	34594
8364	-9.13253e+06	4.49837e+06	243.743	-24.1418	34890
8365	-9.15129e+06	4.42337e+06	248.359	-22.2806	35235
8366	-9.05557e+06	4.44991e+06	305.094	-22.6665	33900
8367	-9.01187e+06	4.46893e+06	298.133	-23.1724	33196
8368	-9.00577e+06	4.43233e+06	306.792	-22.435	33400
8369	-9.05328e+06	4.41708e+06	310.143	-22.0773	34109
8370	-9.00217e+06	4.45096e+06	298.211	-22.7513	33393
8371	-9.03305e+06	4.49461e+06	301.728	-23.6942	33013
8372	-9.004e+06	4.50189e+06	288.583	-23.7085	32895
8373	-8.9752e+06	4.47457e+06	281.868	-22.8476	33344
8374	-9.04076e+06	4.46215e+06	302.511	-22.9785	33647
8375	-9.00217e+06	4.42853e+06	306.792	-22.435	33400
8376	-9.05666e+06	4.47966e+06	302.563	-23.5168	33426
8377	-8.93412e+06	4.47331e+06	269.059	-22.6635	33527
8378	-8.93366e+06	4.44689e+06	309.958	-22.6436	32802
8379	-8.89689e+06	4.49005e+06	263.049	-23.2966	33337
8380	-8.96116e+06	4.43502e+06	319.762	-22.4511	32875
8381	-8.95007e+06	4.50472e+06	253.034	-23.1736	33489
8382	-8.89218e+06	4.48549e+06	274.893	-23.1471	33236
8383	-8.92135e+06	4.43319e+06	327.086	-22.7289	32371
8384	-8.96068e+06	4.49056e+06	263.868	-23.0772	33434
8385	-8.82833e+06	4.46819e+06	305.817	-23.5529	32368
8386	-8.81916e+06	4.42237e+06	344.003	-23.1382	31982
8387	-8.81692e+06	4.50674e+06	264.321	-23.9044	32597
8388	-8.80945e+06	4.50539e+06	264.321	-23.9044	32597
8389	-8.78508e+06	4.41218e+06	362.966	-22.8598	32359
8390	-8.82271e+06	4.4224e+06	344.003	-23.1382	31982
8391	-8.78604e+06	4.49865e+06	270.037	-23.8825	32263
8392	-8.87328e+06	4.43842e+06	327.209	-23.1983	32151
8393	-8.8568e+06	4.49538e+06	298.756	-23.7497	32885
8394	-8.72827e+06	4.41759e+06	379.354	-22.6718	32921
8395	-8.68646e+06	4.43881e+06	398.15	-22.6442	33269
8396	-8.77747e+06	4.44258e+06	335.122	-23.3724	31845
8397	-8.76839e+06	4.5046e+06	275.849	-23.8825	32145
8398	-8.77736e+06	4.42853e+06	346.832	-23.2195	32000
8399	-8.71688e+06	4.45508e+06	381.817	-23.0792	32319
8400	-8.75679e+06	4.46175e+06	327.47	-23.672	31243
8401	-8.70306e+06	4.42853e+06	393.672	-22.6534	33168
8402	-8.73587e+06	4.50371e+06	311.658	-23.6699	32502
8403	-8.70306e+06	4.45028e+06	389.276	-22.9603	32566
8404	-8.7286e+06	4.4885e+06	331.93	-23.6699	32166
8405	-8.73394e+06	4.43465e+06	374.832	-22.9022	32551
8406	-8.76578e+06	4.46113e+06	321.379	-23.6779	31381
8407	-8.64249e+06	4.41152e+06	366.706	-21.6802	35953
8408	-8.65331e+06	4.44519e+06	382.468	-22.4359	34173
8409	-8.59994e+06	4.42933e+06	377.267	-21.8487	35957
8410	-8.62409e+06	4.48625e+06	358.837	-23.0747	33545
8411	-8.58749e+06	4.41261e+06	376.328	-21.3056	36776
8412	-8.61199e+06	4.4539e+06	402.305	-22.6298	34121
8413	-8.66728e+06	4.4783e+06	344.286	-22.9695	33590
8414	-8.62007e+06	4.42591e+06	364.736	-21.6786	36300
8415	-8.55926e+06	4.42846e+06	391.648	-21.778	35671
8416	-8.51293e+06	4.48326e+06	368.84	-22.81	34325
8417	-8.51646e+06	4.45926e+06	396.281	-22.3916	34586
8418	-8.49945e+06	4.44247e+06	417.755	-22.1651	34612
8419	-8.5461e+06	4.44804e+06	402.36	-22.0868	34976
8420	-8.54297e+06	4.48283e+06	356.625	-22.3668	34860
8421	-8.57514e+06	4.45294e+06	391.299	-22.207	34921
8422	-8.58048e+06	4.48046e+06	366.064	-22.9699	33833
8423	-8.57989e+06	4.50695e+06	343.026	-23.576	33252
8424	-8.52425e+06	4.42767e+06	417.849	-21.9073	35068
8425	-8.48639e+06	4.47295e+06	379.164	-22.7065	34275
8426	-8.41951e+06	4.45996e+06	384.033	-21.9336	34709
8427	-8.33942e+06	4.48475e+06	434.441	-22.2496	32773
8428	-8.32152e+06	4.42782e+06	480.485	-21.6367	33467
8429	-8.2684e+06	4.50478e+06	377.318	-22.4445	32698
8430	-8.29429e+06	4.47702e+06	441.043	-22.4228	32412
8431	-8.24632e+06	4.48802e+06	440.815	-22.8213	31645
8432	-8.18941e+06	4.48799e+06	427.469	-22.899	31159
8433	-8.11643e+06	4.41743e+06	410.745	-21.632	31765
8434	-8.15648e+06	4.4718e+06	409.348	-22.0117	32253
8435	-8.13159e+06	4.47972e+06	399.698	-22.0286	32286
8436	-8.13529e+06	4.44302e+06	430.342	-21.7826	31908
8437	-8.18841e+06	4.46915e+06	459.136	-22.5967	31386
8438	-8.11894e+06	4.5048e+06	403.716	-22.3608	31762
8439	-8.10564e+06	4.44859e+06	432.233	-21.833	31738
8440	-8.05568e+06	4.48161e+06	463.889	-22.1513	31014
8441	-8.07761e+06	4.46626e+06	428.072	-21.7326	31995
8442	-8.0146e+06	4.47729e+06	429.577	-21.8654	31348
8443	-8.03941e+06	4.45904e+06	445.126	-21.6225	31823
8444	-7.98408e+06	4.46272e+06	388.162	-21.3726	32158
8445	-7.99433e+06	4.41805e+06	476.806	-21.6058	30731
8446	-7.94986e+06	4.4538e+06	376.163	-21.5279	31495
8447	-7.94577e+06	4.41797e+06	414.301	-21.9267	29297
8448	-7.9153e+06	4.43329e+06	400.252	-22.2612	28163
8449	-7.92497e+06	4.48027e+06	369.339	-21.9654	30386
8450	-7.90595e+06	4.49012e+06	353.573	-22.1179	29830
8451	-7.86972e+06	4.41888e+06	429.103	-23.1771	25155
8452	-7.87793e+06	4.44399e+06	379.175	-22.5354	27125
8453	-7.86761e+06	4.46823e+06	368.471	-22.66	27442
8454	-7.82635e+06	4.44748e+06	357.903	-23.2361	25650
8455	-7.82761e+06	4.41956e+06	414.118	-23.5959	24419
8456	-7.76233e+06	4.50268e+06	458.208	-24.905	24372
8457	-7.75696e+06	4.42355e+06	423.378	-22.8979	25626
8458	-7.73972e+06	4.45574e+06	417.3	-23.5718	25236
8459	-7.72657e+06	4.43349e+06	331.387	-21.0071	29793
8460	-7.78778e+06	4.41251e+06	396.821	-22.6781	25922
8461	-7.80159e+06	4.47298e+06	353.762	-23.5046	25863
8462	-7.78624e+06	4.43864e+06	407.789	-23.6667	24736
8463	-7.7202e+06	4.48594e+06	348.373	-23.1283	26868
8464	-7.70004e+06	4.46232e+06	287.599	-21.3796	29820
8465	-7.67344e+06	4.43789e+06	275.982	-20.367	31525
8466	-7.63615e+06	4.46837e+06	287.012	-21.108	30301
8467	-7.63122e+06	4.42768e+06	252.626	-20.0341	32639
8468	-7.66547e+06	4.489e+06	272.177	-21.7374	29161
8469	-7.5312e+06	4.4205e+06	303.222	-19.8151	32961
8470	-7.5898e+06	4.40687e+06	272.044	-19.4997	33477
8471	-7.57662e+06	4.46403e+06	294.457	-20.349	32017
8472	-7.61126e+06	4.48671e+06	271.549	-20.7843	31190
8473	-7.60409e+06	4.44382e+06	286.075	-20.19	32179
8474	-7.56868e+06	4.42836e+06	304.19	-19.9734	32438
8475	-7.55284e+06	4.49201e+06	278.211	-20.4695	32176
8476	-7.54904e+06	4.45856e+06	283.855	-20.3912	31913
8477	-7.43537e+06	4.44196e+06	280.325	-18.3528	35800
8478	-7.49024e+06	4.41386e+06	286.476	-19.0602	34445
8479	-7.47684e+06	4.48349e+06	263.284	-19.8185	33997
8480	-7.48622e+06	4.44467e+06	272.252	-19.197	34503
8481	-7.51878e+06	4.47916e+06	270.583	-20.4401	32420
8482	-7.52374e+06	4.44051e+06	286.247	-19.8889	32994
8483	-7.45079e+06	4.42514e+06	270.526	-18.2201	35783
8484	-7.52178e+06	4.50644e+06	294.464	-20.7267	32068
8485	-7.43877e+06	4.47769e+06	266.979	-19.411	34578
8486	-7.46844e+06	4.46223e+06	261.347	-19.3683	34631
8487	-7.51786e+06	4.46175e+06	276.281	-20.1712	32681
8488	-7.3726e+06	4.47816e+06	268.846	-18.8325	34886
8491	-7.42476e+06	4.50213e+06	255.501	-19.5742	34470
8492	-7.3834e+06	4.44721e+06	293.866	-18.1969	35506
8493	-7.40732e+06	4.43788e+06	311.398	-18.0576	35769
8495	-7.42923e+06	4.45769e+06	272.648	-18.8111	35396
8498	-7.40285e+06	4.50154e+06	258.156	-19.4193	34630
8499	-7.41997e+06	4.47944e+06	274.035	-19.2417	34828
8500	-7.36953e+06	4.49339e+06	262.658	-19.0724	34777
8501	-7.41888e+06	4.4183e+06	293.442	-17.899	36065
8502	-7.32579e+06	4.4368e+06	228.992	-17.376	35926
8504	-1.16911e+07	4.59336e+06	-232.141	-12.8765	38952
8505	-1.01459e+07	4.59624e+06	143.712	-30.4117	9376
8506	-1.00849e+07	4.59194e+06	-150.288	-24.8271	21463
8507	-9.97958e+06	4.60044e+06	-259.341	-25.9107	24884
8508	-1.00037e+07	4.53426e+06	-383.115	-24.9473	28335
8509	-9.75927e+06	4.59978e+06	-184.283	-24.7014	28426
8510	-9.72061e+06	4.51247e+06	-245.633	-24.1456	31390
8511	-9.58251e+06	4.59978e+06	-142.323	-25.8118	30770
8512	-9.58198e+06	4.56563e+06	-159.558	-24.9578	31852
8513	-9.63558e+06	4.60027e+06	-141.091	-25.2527	30211
8514	-9.58193e+06	4.56045e+06	-159.558	-24.9578	31852
8515	-9.52854e+06	4.5561e+06	-109.797	-24.5824	32748
8516	-9.47543e+06	4.57772e+06	-53.8214	-24.6913	33546
8517	-9.47498e+06	4.54277e+06	-70.5601	-24.133	34061
8518	-9.52508e+06	4.51135e+06	-118.825	-24.079	33495
8519	-9.53014e+06	4.55343e+06	-109.797	-24.5824	32748
8520	-9.47558e+06	4.52603e+06	-80.4901	-23.933	34251
8521	-9.5296e+06	4.60035e+06	-75.8737	-25.2422	31720
8522	-9.42167e+06	4.5863e+06	-21.8146	-24.362	34351
8523	-9.39182e+06	4.56721e+06	6.75982	-24.3483	34323
8524	-9.37437e+06	4.59455e+06	32.7314	-24.7322	33902
8525	-9.40017e+06	4.51224e+06	-30.9761	-23.8105	34808
8526	-9.37453e+06	4.59626e+06	32.7314	-24.7322	33902
8527	-9.42177e+06	4.58647e+06	-21.8146	-24.362	34351
8528	-9.40116e+06	4.54102e+06	-11.2924	-24.0364	34530
8529	-9.3686e+06	4.5442e+06	25.0603	-24.1097	34398
8530	-9.32477e+06	4.57681e+06	106.508	-25.1391	32913
8531	-9.26738e+06	4.59417e+06	158.052	-26.0559	31420
8532	-9.335e+06	4.60774e+06	90.9188	-25.1778	33179
8533	-9.33639e+06	4.57418e+06	93.1251	-24.9791	33165
8534	-9.3199e+06	4.53816e+06	94.6992	-24.7224	33507
8535	-9.30269e+06	4.57418e+06	128.925	-25.5022	32451
8536	-9.27275e+06	4.59996e+06	166.951	-26.2428	31200
8537	-9.28449e+06	4.55008e+06	127.787	-25.4474	32675
8538	-9.31977e+06	4.54471e+06	94.6992	-24.7224	33507
8539	-9.31647e+06	4.55314e+06	106.524	-25.0362	33134
8540	-9.28201e+06	4.60361e+06	159.143	-26.0951	31486
8541	-9.31683e+06	4.51943e+06	109.691	-24.5753	33474
8542	-9.27717e+06	4.55425e+06	135.319	-25.4474	32583
8543	-9.28438e+06	4.57228e+06	149.426	-25.7644	31922
8544	-9.28094e+06	4.54862e+06	127.787	-25.4474	32675
8545	-9.28271e+06	4.55154e+06	127.787	-25.4474	32675
8546	-9.33895e+06	4.56627e+06	75.7625	-24.7243	33545
8547	-9.2011e+06	4.56017e+06	184.338	-24.3496	33862
8548	-9.19224e+06	4.60313e+06	197.224	-24.2425	34399
8549	-9.23707e+06	4.53171e+06	160.204	-24.7065	33342
8550	-9.1766e+06	4.6067e+06	221.6	-24.1815	34230
8551	-9.20672e+06	4.54102e+06	183.375	-24.4018	33862
8552	-9.23634e+06	4.57313e+06	147.17	-25.148	32793
8553	-9.23803e+06	4.54636e+06	151.964	-24.972	33049
8554	-9.19388e+06	4.59658e+06	195.446	-24.2348	34280
8555	-9.18993e+06	4.60385e+06	197.224	-24.2425	34399
8556	-9.19034e+06	4.60093e+06	197.224	-24.2425	34399
8557	-9.2305e+06	4.58503e+06	140.419	-25.2534	32552
8558	-9.19392e+06	4.60382e+06	197.224	-24.2425	34399
8559	-9.1912e+06	4.52509e+06	192.28	-24.2672	33999
8560	-9.2305e+06	4.58503e+06	140.419	-25.2534	32552
8561	-9.18653e+06	4.56891e+06	202.416	-24.1638	34161
8562	-9.25676e+06	4.53417e+06	145.919	-24.9739	33137
8563	-9.19397e+06	4.56485e+06	195.025	-24.1886	34151
8564	-9.18953e+06	4.53005e+06	191.775	-24.2672	34007
8565	-9.19437e+06	4.52951e+06	191.775	-24.2672	34007
8566	-9.15013e+06	4.56459e+06	209.376	-24.283	33985
8567	-9.15084e+06	4.52865e+06	215.496	-24.2494	34431
8568	-9.14167e+06	4.56688e+06	213.905	-24.3429	33802
8569	-9.10246e+06	4.53378e+06	250.07	-24.3731	33707
8570	-9.15851e+06	4.5539e+06	206.852	-24.2141	34198
8571	-9.0919e+06	4.52289e+06	261.219	-24.2998	33655
8572	-9.14904e+06	4.59658e+06	220.606	-24.4481	33528
8573	-9.10391e+06	4.57282e+06	239.695	-24.6111	33298
8574	-9.05124e+06	4.58305e+06	253.689	-25.0238	32904
8575	-9.00949e+06	4.5257e+06	291.54	-24.206	32556
8576	-9.04958e+06	4.54679e+06	296.77	-24.82	32474
8577	-9.04792e+06	4.51183e+06	294.659	-24.1712	32958
8578	-9.00064e+06	4.58078e+06	227.031	-25.0098	32286
8579	-9.00106e+06	4.53791e+06	277.443	-24.5052	32334
8580	-8.87963e+06	4.58215e+06	240.557	-25.1371	31785
8581	-8.91842e+06	4.52966e+06	224.987	-23.7193	33330
8582	-8.90647e+06	4.60684e+06	262.557	-25.5957	31325
8583	-8.92093e+06	4.59394e+06	245.006	-25.1697	31986
8584	-8.90398e+06	4.55882e+06	215.099	-24.4085	32645
8585	-8.9622e+06	4.55063e+06	248.809	-24.3988	32504
8586	-8.9552e+06	4.59278e+06	241.945	-25.2297	32103
8587	-8.95122e+06	4.51073e+06	246.89	-23.4065	33475
8588	-8.96068e+06	4.60313e+06	240.428	-25.4659	32015
8589	-8.93305e+06	4.57145e+06	235.74	-24.6394	32405
8590	-8.86887e+06	4.52545e+06	227.074	-23.9863	33182
8591	-8.86315e+06	4.55458e+06	210.873	-24.5278	32621
8592	-8.7876e+06	4.54883e+06	222.199	-24.5802	32360
8593	-8.82586e+06	4.60229e+06	248.079	-25.993	30735
8594	-8.86946e+06	4.59177e+06	252.587	-25.5243	31431
8595	-8.82912e+06	4.55231e+06	218.935	-24.6944	32351
8596	-8.79609e+06	4.58497e+06	226.95	-25.2815	31419
8597	-8.83718e+06	4.59814e+06	250.823	-25.993	30898
8598	-8.70789e+06	4.54102e+06	209.63	-23.71	33638
8599	-8.71368e+06	4.56613e+06	170.221	-23.9333	33811
8600	-8.74889e+06	4.58602e+06	190.62	-24.7852	32741
8601	-8.74938e+06	4.5581e+06	200.766	-24.358	33012
8602	-8.69438e+06	4.59115e+06	170.854	-24.6486	33010
8603	-8.70403e+06	4.59514e+06	165.045	-24.5683	33208
8604	-8.71271e+06	4.56913e+06	159.687	-24.0655	33837
8605	-8.71947e+06	4.57014e+06	164.098	-24.0382	33897
8606	-8.74938e+06	4.52088e+06	254.752	-23.8783	32733
8607	-8.71947e+06	4.57014e+06	164.098	-24.0382	33897
8608	-8.74889e+06	4.52037e+06	254.752	-23.8783	32733
8609	-8.75131e+06	4.52491e+06	254.752	-23.8783	32733
8610	-8.72649e+06	4.57202e+06	164.098	-24.0382	33897
8611	-8.70096e+06	4.53567e+06	233.934	-23.5931	33547
8612	-8.73561e+06	4.53356e+06	234.698	-23.7941	33316
8613	-8.77253e+06	4.60313e+06	213.866	-25.6315	31367
8614	-8.74841e+06	4.57615e+06	194.805	-24.5717	32895
8615	-8.62819e+06	4.56888e+06	230.257	-24.5956	32380
8616	-8.62753e+06	4.54312e+06	275.893	-24.2131	32610
8617	-8.66652e+06	4.51272e+06	282.183	-23.1794	33877
8618	-8.64903e+06	4.58615e+06	210.285	-24.7494	32365
8619	-8.62282e+06	4.51635e+06	316.953	-23.679	33119
8620	-8.62936e+06	4.5962e+06	230.988	-24.9037	32103
8621	-8.67491e+06	4.59134e+06	195.886	-24.7868	32488
8622	-8.67715e+06	4.55517e+06	199.406	-24.0515	33126
8623	-8.53791e+06	4.58366e+06	300.195	-25.3988	31342
8624	-8.5795e+06	4.57306e+06	286.143	-25.272	31480
8625	-8.49636e+06	4.54975e+06	350.192	-24.7612	31987
8626	-8.49901e+06	4.57949e+06	331.049	-25.3864	31374
8627	-8.53165e+06	4.55124e+06	322.189	-24.9454	31778
8628	-8.54298e+06	4.51597e+06	335.526	-23.9061	32824
8629	-8.5799e+06	4.53808e+06	321.393	-24.8808	31827
8630	-8.508e+06	4.51658e+06	346.339	-23.8229	33086
8631	-8.40162e+06	4.57839e+06	435.045	-23.965	32127
8632	-8.45031e+06	4.53891e+06	390.608	-24.2204	32398
8633	-8.43474e+06	4.57724e+06	398.803	-24.4191	31890
8634	-8.47741e+06	4.51019e+06	357.16	-23.6863	33161
8635	-8.45061e+06	4.51008e+06	346.421	-23.4976	33315
8636	-8.39535e+06	4.50882e+06	404.036	-22.5951	33325
8637	-8.46481e+06	4.58011e+06	363.888	-25.0674	31528
8638	-8.47539e+06	4.55247e+06	370.843	-24.6123	32069
8639	-8.34184e+06	4.53651e+06	433.091	-23.4828	31209
8640	-8.30196e+06	4.59888e+06	399.727	-25.122	29243
8641	-8.30899e+06	4.52788e+06	401.566	-23.1716	31659
8642	-8.34463e+06	4.59219e+06	420.068	-25.1972	29107
8643	-8.26517e+06	4.52672e+06	380.213	-22.5929	32457
8644	-8.23251e+06	4.51074e+06	436.376	-23.3504	30761
8645	-8.20397e+06	4.59059e+06	370.592	-24.0178	30457
8646	-8.2132e+06	4.5537e+06	415.462	-23.8667	30045
8647	-8.24417e+06	4.54776e+06	415.401	-23.4816	30943
8648	-8.24354e+06	4.5867e+06	414.267	-24.2232	30321
8649	-8.27046e+06	4.55584e+06	382.498	-22.858	32385
8650	-8.26195e+06	4.60774e+06	399.971	-25.4456	28944
8651	-8.20013e+06	4.50818e+06	427.585	-23.5106	30235
8652	-8.13924e+06	4.57749e+06	354.966	-23.7209	30633
8653	-8.12521e+06	4.52825e+06	400.989	-22.9376	31003
8654	-8.14145e+06	4.60267e+06	331.415	-24.0111	30548
8655	-8.15658e+06	4.60143e+06	338.478	-24.1372	30382
8656	-8.1369e+06	4.55244e+06	381.427	-23.2774	30829
8657	-8.14918e+06	4.51207e+06	387.174	-22.7403	31640
8658	-8.19823e+06	4.60349e+06	369.858	-24.3431	30022
8659	-8.17633e+06	4.51171e+06	386.479	-22.991	31287
8660	-8.18491e+06	4.56081e+06	381.696	-23.7953	30371
8661	-8.11283e+06	4.57746e+06	367.324	-23.7167	30285
8662	-8.09579e+06	4.51075e+06	441.161	-22.6767	30837
8663	-8.01332e+06	4.54065e+06	406.256	-22.9717	29742
8664	-8.04552e+06	4.5612e+06	419.983	-23.5185	29177
8665	-8.05446e+06	4.59248e+06	386.26	-24.0681	28915
8666	-8.04885e+06	4.5273e+06	469.452	-23.1608	29507
8667	-8.08808e+06	4.56771e+06	396.672	-23.6889	29840
8668	-7.94275e+06	4.59069e+06	340.727	-23.6016	28961
8669	-8.0007e+06	4.56234e+06	374.923	-23.1789	29366
8670	-7.91403e+06	4.58544e+06	346.32	-23.2551	29303
8671	-8.00714e+06	4.58877e+06	354.701	-23.7742	28736
8672	-7.9352e+06	4.54991e+06	326.634	-22.5029	30337
8673	-7.96362e+06	4.56753e+06	353.481	-23.297	29129
8674	-7.95366e+06	4.52289e+06	334.17	-21.9488	31217
8675	-7.82675e+06	4.59252e+06	462.022	-24.1929	27332
8676	-7.84997e+06	4.5797e+06	431.51	-23.7379	28050
8677	-7.88026e+06	4.59147e+06	366.315	-23.5019	28927
8678	-7.8238e+06	4.5109e+06	392.694	-23.4324	26852
8679	-7.82259e+06	4.55413e+06	417.288	-23.4302	27994
8680	-7.86611e+06	4.54226e+06	336.466	-22.2966	30116
8681	-7.9028e+06	4.55904e+06	342.688	-22.7121	29855
8682	-7.76768e+06	4.60771e+06	552.988	-24.4101	25926
8683	-7.79574e+06	4.53702e+06	550.711	-24.5818	25202
8684	-7.78946e+06	4.57848e+06	504.375	-24.2301	26732
8685	-7.80132e+06	4.59996e+06	490.678	-24.3967	26824
8686	-7.71966e+06	4.54022e+06	849.734	-26.0385	21573
8687	-7.74127e+06	4.5982e+06	609.861	-24.7354	24832
8688	-7.63526e+06	4.52507e+06	290.152	-22.9008	26892
8689	-7.67609e+06	4.54307e+06	605.847	-25.295	22594
8690	-7.70618e+06	4.58618e+06	846.113	-26.5309	20653
8691	-7.65675e+06	4.57652e+06	547.106	-25.3157	22961
8692	-7.69344e+06	4.5137e+06	449.427	-23.9902	25116
8693	-7.58074e+06	4.59433e+06	288.972	-23.1785	27779
8694	-7.5459e+06	4.59895e+06	269.898	-22.4215	29745
8695	-7.57239e+06	4.5695e+06	323.911	-22.8424	28139
8696	-7.5796e+06	4.51037e+06	307.747	-20.2367	32910
8697	-7.57136e+06	4.53779e+06	359.655	-22.0871	29367
8698	-7.5422e+06	4.57688e+06	320.722	-22.1595	29755
8699	-7.55307e+06	4.54898e+06	319.515	-21.5665	30539
8700	-7.52707e+06	4.53198e+06	310.252	-21.0585	31792
8701	-7.61048e+06	4.55964e+06	228.075	-22.9756	27804
8702	-7.4307e+06	4.59694e+06	0	0	0
8703	-7.43301e+06	4.59764e+06	255.363	-21.4459	32915
8704	-7.43298e+06	4.59764e+06	255.363	-21.4459	32915
8705	-7.43301e+06	4.59764e+06	255.363	-21.4459	32915
8706	-7.43494e+06	4.59804e+06	255.363	-21.4459	32915
8707	-7.43499e+06	4.59808e+06	255.363	-21.4459	32915
8708	-7.43499e+06	4.59636e+06	0	0	0
8709	-7.45903e+06	4.59276e+06	245.335	-21.7202	31860
8710	-7.49136e+06	4.60567e+06	293.76	-21.9864	31159
8711	-7.43499e+06	4.59808e+06	255.363	-21.4459	32915
8712	-7.45906e+06	4.59275e+06	245.335	-21.7202	31860
8713	-7.42993e+06	4.60303e+06	255.363	-21.4459	32915
8714	-7.49827e+06	4.59051e+06	298.389	-21.839	31069
8715	-7.44008e+06	4.58004e+06	178.427	-20.6377	33942
8716	-7.43494e+06	4.59804e+06	255.363	-21.4459	32915
8717	-7.43301e+06	4.59764e+06	255.363	-21.4459	32915
8718	-7.45611e+06	4.59153e+06	227.434	-21.4226	32519
8719	-7.49563e+06	4.59404e+06	282.533	-21.8083	31303
8720	-7.44322e+06	4.60501e+06	244.021	-21.5355	32758
8721	-7.43298e+06	4.59764e+06	255.363	-21.4459	32915
8722	-7.44649e+06	4.60506e+06	244.021	-21.5355	32758
8723	-7.44652e+06	4.60502e+06	244.021	-21.5355	32758
8724	-7.49567e+06	4.59403e+06	282.533	-21.8083	31303
8725	-7.431e+06	4.59864e+06	255.363	-21.4459	32915
8726	-7.49221e+06	4.5259e+06	291.348	-20.9665	32086
8727	-7.47554e+06	4.57855e+06	239.23	-21.4735	32018
8728	-7.43022e+06	4.60143e+06	255.363	-21.4459	32915
8729	-7.43301e+06	4.59764e+06	255.363	-21.4459	32915
8730	-7.49139e+06	4.60572e+06	293.76	-21.9864	31159
8731	-7.44652e+06	4.60502e+06	244.021	-21.5355	32758
8732	-7.50746e+06	4.58222e+06	291.528	-21.7368	31160
8733	-7.43928e+06	4.59601e+06	207.682	-21.0552	33437
8734	-7.52178e+06	4.55671e+06	277.57	-21.1335	31904
8735	-7.43301e+06	4.59764e+06	255.363	-21.4459	32915
8736	-7.43025e+06	4.60146e+06	255.363	-21.4459	32915
8737	-7.49824e+06	4.59055e+06	298.389	-21.839	31069
8738	-7.44438e+06	4.53443e+06	229.3	-20.2528	33640
8739	-7.49139e+06	4.60572e+06	293.76	-21.9864	31159
8740	-7.43301e+06	4.59764e+06	255.363	-21.4459	32915
8741	-7.44006e+06	4.58005e+06	178.427	-20.6377	33942
8742	-7.42993e+06	4.60303e+06	255.363	-21.4459	32915
8743	-7.46306e+06	4.51036e+06	262.525	-20.3666	33247
8744	-7.49136e+06	4.60567e+06	293.76	-21.9864	31159
8745	-7.47314e+06	4.54938e+06	241.988	-20.9307	32407
8746	-7.44649e+06	4.60506e+06	244.021	-21.5355	32758
8747	-7.43065e+06	4.59689e+06	0	0	0
8748	-7.43494e+06	4.59634e+06	0	0	0
8749	-7.44324e+06	4.60502e+06	244.021	-21.5355	32758
8750	-7.42375e+06	4.59874e+06	290.855	-21.5646	32396
8751	-7.42211e+06	4.60163e+06	290.855	-21.5646	32396
8752	-7.38371e+06	4.58765e+06	324.353	-21.4431	31913
8753	-7.42211e+06	4.60163e+06	290.855	-21.5646	32396
8754	-7.42211e+06	4.60163e+06	290.855	-21.5646	32396
8755	-7.42207e+06	4.6016e+06	290.855	-21.5646	32396
8756	-7.42207e+06	4.6016e+06	290.855	-21.5646	32396
8757	-7.4262e+06	4.59916e+06	290.855	-21.5646	32396
8758	-7.38372e+06	4.58768e+06	324.353	-21.4431	31913
8759	-7.42616e+06	4.59914e+06	290.855	-21.5646	32396
8760	-7.42371e+06	4.59872e+06	290.855	-21.5646	32396
8761	-7.42207e+06	4.6016e+06	290.855	-21.5646	32396
8762	-7.42207e+06	4.6016e+06	290.855	-21.5646	32396
8763	-7.42211e+06	4.60163e+06	290.855	-21.5646	32396
8764	-7.41052e+06	4.51922e+06	244.322	-19.7545	34287
8765	-1.17747e+07	4.7022e+06	-263.792	-12.5186	40764
8766	-1.17324e+07	4.67383e+06	73.6598	-13.8283	36547
8767	-1.17713e+07	4.60811e+06	-374.451	-11.9101	39759
8768	-1.16748e+07	4.60811e+06	209.572	-12.9973	34594
8769	-1.16748e+07	4.60811e+06	209.572	-12.9973	34594
8770	-1.16748e+07	4.60811e+06	209.572	-12.9973	34594
8771	-1.16523e+07	4.63835e+06	876.283	-17.6091	20973
8772	-1.14183e+07	4.6679e+06	-482.893	-23.0344	24107
8773	-1.09131e+07	4.61275e+06	-404.403	-26.5134	24431
8774	-1.08833e+07	4.67866e+06	-338.54	-26.776	23583
8775	-1.01549e+07	4.66642e+06	24.0755	-26.3916	14653
8776	-1.01418e+07	4.67929e+06	-126.895	-23.7911	21148
8777	-1.01424e+07	4.67085e+06	-112.474	-24.0964	20408
8778	-1.01188e+07	4.68425e+06	-197.391	-23.4976	23758
8779	-9.95746e+06	4.70468e+06	-206.529	-26.3968	24111
8780	-9.93654e+06	4.63643e+06	-231.156	-26.0695	24533
8781	-9.93664e+06	4.63702e+06	-231.156	-26.0695	24533
8782	-9.85945e+06	4.63955e+06	-232.379	-25.1734	25833
8783	-9.89973e+06	4.63848e+06	-236.694	-25.7236	25268
8784	-9.7504e+06	4.64376e+06	-153.141	-24.9001	27673
8785	-9.8155e+06	4.68551e+06	-206.013	-24.6761	26941
8786	-9.81453e+06	4.64298e+06	-192.255	-24.6371	26477
8787	-9.81372e+06	4.64855e+06	-192.716	-24.6371	26495
8788	-9.81372e+06	4.65286e+06	-192.716	-24.6371	26495
8789	-9.69629e+06	4.69128e+06	-107.922	-25.6943	28407
8790	-9.63709e+06	4.64281e+06	-124.959	-25.9732	29341
8791	-9.58355e+06	4.64299e+06	-114.616	-26.3203	30245
8792	-9.58563e+06	4.68587e+06	-92.9741	-26.8893	29878
8793	-9.61844e+06	4.64391e+06	-126.299	-26.0808	29496
8794	-9.46201e+06	4.6967e+06	-0.538949	-27.3595	29894
8795	-9.47602e+06	4.61249e+06	-53.3423	-25.2005	32841
8796	-9.47558e+06	4.64721e+06	-38.3188	-26.2043	31431
8797	-9.5314e+06	4.68589e+06	-53.6911	-27.1527	29643
8798	-9.52969e+06	4.64282e+06	-70.6117	-26.2128	30811
8799	-9.52142e+06	4.67388e+06	-51.0747	-26.9302	30022
8800	-9.42191e+06	4.69018e+06	22.5764	-27.3649	30161
8801	-9.37503e+06	4.64301e+06	45.1431	-25.753	32420
8802	-9.44103e+06	4.69757e+06	15.5639	-27.5604	29840
8803	-9.44678e+06	4.67349e+06	-11.4226	-26.7509	30887
8804	-9.42089e+06	4.68978e+06	22.5764	-27.3649	30161
8805	-9.36746e+06	4.68584e+06	79.3411	-26.8946	30526
8806	-9.42216e+06	4.62122e+06	-33.8014	-25.2404	33133
8807	-9.42246e+06	4.65607e+06	-8.59873	-26.1224	31679
8808	-9.41389e+06	4.61917e+06	-20.4098	-25.2188	33168
8809	-9.26449e+06	4.68505e+06	122.413	-26.495	31916
8810	-9.33925e+06	4.6184e+06	78.3324	-25.2424	33101
8811	-9.27532e+06	4.63869e+06	134.122	-26.1006	31983
8812	-9.33286e+06	4.63725e+06	91.3985	-25.6249	32562
8813	-9.35265e+06	4.69653e+06	89.9897	-27.1291	30239
8814	-9.31374e+06	4.68529e+06	103.198	-26.5026	31485
8815	-9.3256e+06	4.65462e+06	101.922	-25.8621	32193
8816	-9.2949e+06	4.64584e+06	122.235	-25.8917	32263
8817	-9.33595e+06	4.65378e+06	91.9545	-25.8752	32233
8818	-9.34001e+06	4.61533e+06	77.1075	-25.1219	33305
8819	-9.22043e+06	4.68966e+06	148.77	-26.9102	31731
8820	-9.18071e+06	4.62083e+06	239.492	-24.604	33692
8821	-9.19652e+06	4.6608e+06	201.138	-25.954	32257
8822	-9.16987e+06	4.62826e+06	279.149	-24.7493	33232
8823	-9.17702e+06	4.68743e+06	175.192	-27.0725	31043
8824	-9.19057e+06	4.66078e+06	201.138	-25.954	32257
8825	-9.21895e+06	4.68332e+06	165.578	-26.6799	31926
8826	-9.18071e+06	4.62083e+06	239.492	-24.604	33692
8827	-9.24318e+06	4.64992e+06	152.44	-26.2038	32020
8828	-9.2348e+06	4.65227e+06	162.085	-26.1186	32185
8829	-9.19449e+06	4.61742e+06	217.606	-24.7354	33617
8830	-9.22969e+06	4.66039e+06	161.561	-26.2538	32186
8831	-9.18045e+06	4.68631e+06	178.447	-26.6739	31578
8832	-9.23931e+06	4.61236e+06	127.255	-25.809	31979
8833	-9.15954e+06	4.64291e+06	286.764	-25.1265	32819
8834	-9.10874e+06	4.69714e+06	219.049	-28.2636	29674
8835	-9.14364e+06	4.6195e+06	236.692	-24.8548	33366
8836	-9.1085e+06	4.66809e+06	217.733	-27.2171	30791
8837	-9.1462e+06	4.61204e+06	233.148	-24.6326	33513
8838	-9.14407e+06	4.64568e+06	244.425	-25.6951	32443
8839	-9.10734e+06	4.62404e+06	226.858	-25.2762	33017
8840	-9.15654e+06	4.64585e+06	276.436	-25.3313	32663
8841	-9.10288e+06	4.60911e+06	233.458	-25.0243	33155
8842	-9.14748e+06	4.67423e+06	211.324	-26.7414	31291
8843	-9.16584e+06	4.69316e+06	176.369	-27.1513	30940
8844	-9.14699e+06	4.70587e+06	196.922	-27.8141	30208
8845	-9.11056e+06	4.63924e+06	216.839	-25.9468	32304
8846	-9.14949e+06	4.61185e+06	243.588	-24.5317	33567
8847	-9.02157e+06	4.65063e+06	236.133	-27.1176	30786
8848	-9.04888e+06	4.61401e+06	241.331	-25.791	32278
8849	-9.05846e+06	4.62683e+06	245.05	-26.0868	32119
8850	-9.0688e+06	4.6429e+06	235.66	-26.5936	31568
8851	-8.99289e+06	4.62165e+06	232.401	-25.9861	31674
8852	-9.0684e+06	4.70321e+06	225.444	-28.7014	29177
8853	-9.02597e+06	4.68572e+06	234.732	-28.1403	29694
8854	-9.06766e+06	4.67352e+06	228.448	-27.694	30277
8855	-8.98389e+06	4.69408e+06	244.592	-27.9379	29355
8856	-8.93074e+06	4.69034e+06	228.682	-27.4674	29829
8857	-8.94814e+06	4.6101e+06	247.905	-25.7707	31798
8858	-8.92471e+06	4.65114e+06	262.722	-26.9253	30817
8859	-8.96936e+06	4.65969e+06	260.232	-27.1654	30441
8860	-8.88343e+06	4.68656e+06	228.451	-27.068	30479
8861	-8.93849e+06	4.65678e+06	259.391	-26.8562	30858
8862	-8.96454e+06	4.62006e+06	250.041	-25.9938	31621
8863	-8.94381e+06	4.62243e+06	255.532	-26.1005	31499
8864	-8.92788e+06	4.6548e+06	261.142	-26.8594	30847
8865	-8.94621e+06	4.67655e+06	247.664	-27.1914	30354
8866	-8.86157e+06	4.62945e+06	287.896	-26.797	30357
8867	-8.87659e+06	4.6573e+06	257.413	-27.0389	30511
8868	-8.81499e+06	4.67853e+06	278.575	-27.6993	30219
8869	-8.83121e+06	4.66025e+06	279.569	-27.4213	30185
8870	-8.86612e+06	4.67458e+06	250.727	-27.1166	30466
8871	-8.79903e+06	4.7057e+06	264.637	-27.868	29928
8872	-8.84047e+06	4.68871e+06	245.508	-27.3535	30542
8873	-8.79279e+06	4.65678e+06	251.403	-27.4243	29620
8874	-8.79677e+06	4.642e+06	249.814	-27.2062	29662
8875	-8.74816e+06	4.62452e+06	205.379	-26.1264	31015
8876	-8.72991e+06	4.67239e+06	253.563	-27.6019	29236
8877	-8.70758e+06	4.7048e+06	297.182	-28.1096	28761
8878	-8.72102e+06	4.64314e+06	205.342	-26.8368	30066
8879	-8.77157e+06	4.6121e+06	221.855	-26.0172	30847
8880	-8.77157e+06	4.64489e+06	231.301	-27.0299	30052
8881	-8.70288e+06	4.67898e+06	288.167	-27.6529	28785
8882	-8.77654e+06	4.61416e+06	221.855	-26.0172	30847
8883	-8.76921e+06	4.66968e+06	258.793	-27.6691	29397
8884	-8.71834e+06	4.61692e+06	184.599	-25.4574	32011
8885	-8.75618e+06	4.7026e+06	292.423	-28.1322	29106
8886	-8.61411e+06	4.66245e+06	276.191	-26.4701	30578
8887	-8.67616e+06	4.63373e+06	237.385	-25.6486	31486
8888	-8.65077e+06	4.68327e+06	215.845	-27.1291	30080
8889	-8.63341e+06	4.63081e+06	273.71	-25.6486	31371
8890	-8.589e+06	4.60823e+06	251.16	-25.5001	31358
8891	-8.51392e+06	4.63535e+06	294.868	-26.1659	30444
8892	-8.54756e+06	4.61454e+06	279.412	-25.7613	30992
8893	-8.56888e+06	4.64734e+06	279.936	-26.2851	30590
8894	-8.5503e+06	4.67145e+06	277.391	-26.7032	30142
8895	-8.51208e+06	4.65902e+06	295.566	-26.6287	29709
8896	-8.58354e+06	4.69331e+06	279.56	-27.1534	29914
8897	-8.5052e+06	4.60867e+06	313.737	-25.8565	30861
8898	-8.51229e+06	4.68406e+06	300.597	-26.9364	29547
8899	-8.43426e+06	4.61701e+06	362.334	-25.4702	31257
8900	-8.46759e+06	4.60838e+06	336.406	-25.8565	30986
8901	-8.43196e+06	4.65072e+06	320.254	-26.4666	30565
8902	-8.4664e+06	4.67546e+06	346.833	-26.5954	30244
8903	-8.4389e+06	4.69272e+06	348.384	-26.5971	29893
8904	-8.47076e+06	4.64126e+06	331.543	-26.3203	30499
8905	-8.40539e+06	4.64743e+06	346.448	-26.2027	30323
8906	-8.41431e+06	4.68494e+06	378.432	-26.3539	29879
8907	-8.34831e+06	4.62413e+06	383.038	-25.1569	29720
8908	-8.31987e+06	4.62759e+06	374.896	-25.6405	29124
8909	-8.39102e+06	4.61179e+06	395.403	-25.0782	30783
8910	-8.37921e+06	4.67433e+06	373.389	-26.3027	29514
8911	-8.3071e+06	4.65674e+06	362.611	-26.2671	28724
8912	-8.31113e+06	4.68563e+06	340.013	-26.7557	28882
8913	-8.34695e+06	4.6843e+06	351.684	-26.552	28970
8914	-8.23963e+06	4.7003e+06	404.554	-27.7139	25599
8915	-8.27573e+06	4.68968e+06	388.994	-27.3397	27500
8916	-8.24658e+06	4.66938e+06	412.475	-27.4856	26468
8917	-8.20195e+06	4.69355e+06	394.788	-27.469	25096
8918	-8.21834e+06	4.672e+06	407.409	-27.1358	25962
8919	-8.13285e+06	4.68268e+06	265.83	-25.9985	27967
8920	-8.16056e+06	4.65167e+06	301.196	-25.3326	28660
8921	-8.11936e+06	4.61332e+06	335.278	-24.2735	29924
8922	-8.1571e+06	4.62766e+06	306.484	-24.6793	29685
8923	-8.19912e+06	4.62304e+06	363.007	-25.0034	29035
8924	-8.19389e+06	4.66991e+06	363.187	-26.6676	26271
8925	-8.0939e+06	4.67701e+06	308.522	-26.0189	27432
8926	-8.01531e+06	4.61644e+06	352.805	-24.3777	28325
8927	-8.08398e+06	4.69892e+06	338.073	-27.1635	25732
8928	-8.01414e+06	4.64079e+06	341.788	-25.1953	27679
8929	-8.04708e+06	4.69694e+06	331.724	-26.7625	26121
8930	-8.08631e+06	4.64898e+06	348.271	-25.7007	27592
8931	-8.00931e+06	4.70411e+06	285.745	-26.4438	26590
8932	-8.06665e+06	4.62643e+06	378.49	-24.9293	28075
8933	-7.91371e+06	4.61566e+06	341.397	-23.9429	28686
8934	-7.95778e+06	4.65743e+06	329.008	-25.4982	27132
8935	-7.97247e+06	4.68204e+06	307.988	-25.8264	26881
8936	-7.95873e+06	4.63301e+06	340.107	-24.6997	27818
8937	-7.91632e+06	4.64131e+06	348.52	-24.6987	27898
8938	-7.93465e+06	4.681e+06	317.315	-25.6063	26821
8939	-7.97186e+06	4.61017e+06	342.504	-24.2093	28282
8940	-7.86307e+06	4.65385e+06	335.423	-23.9965	28908
8941	-7.85912e+06	4.68414e+06	381.676	-24.942	27152
8942	-7.89748e+06	4.66894e+06	363.859	-25.2628	27276
8943	-7.82177e+06	4.62588e+06	436.174	-24.386	27183
8944	-7.85251e+06	4.61001e+06	394.037	-23.9367	28275
8945	-7.82309e+06	4.68043e+06	448.901	-24.8879	26250
8946	-7.865e+06	4.62926e+06	329.817	-23.7925	29043
8947	-7.90675e+06	4.70371e+06	301.176	-25.3878	26957
8948	-7.83107e+06	4.64504e+06	396.037	-24.1597	27798
8949	-7.72385e+06	4.67019e+06	421.323	-24.2934	26502
8950	-7.74036e+06	4.69285e+06	454.719	-24.8345	25517
8951	-7.78074e+06	4.66868e+06	537.059	-24.9283	24893
8952	-7.78372e+06	4.69453e+06	489.381	-25.0405	25234
8953	-7.72353e+06	4.64194e+06	522.973	-24.5617	25383
8954	-7.75588e+06	4.63663e+06	551.344	-24.3248	25525
8955	-7.62564e+06	4.70452e+06	596.83	-26.8524	22344
8956	-7.67712e+06	4.61843e+06	763.591	-26.8286	20357
8957	-7.68504e+06	4.69933e+06	502.799	-25.6203	24529
8958	-7.52841e+06	4.65452e+06	261.017	-23.7815	28642
8959	-7.53645e+06	4.69926e+06	335.849	-25.5709	25840
8960	-7.55109e+06	4.66389e+06	278.667	-24.2288	27567
8961	-7.58511e+06	4.63931e+06	298.039	-24.1218	26980
8962	-7.60923e+06	4.60864e+06	368.518	-24.3179	25703
8963	-7.61678e+06	4.64938e+06	336.812	-24.3339	26433
8964	-7.5513e+06	4.62857e+06	262.147	-23.392	28564
8965	-7.4802e+06	4.61369e+06	293.572	-22.1816	31139
8966	-7.49843e+06	4.62175e+06	308.984	-22.1907	31022
8967	-7.52564e+06	4.6197e+06	276.628	-22.5188	30235
8968	-7.48018e+06	4.6137e+06	293.572	-22.1816	31139
8969	-7.45044e+06	4.69426e+06	391.014	-24.9953	26594
8970	-7.49087e+06	4.61739e+06	305.243	-22.2476	31023
8971	-7.49843e+06	4.62172e+06	308.984	-22.1907	31022
8972	-7.49928e+06	4.69992e+06	352.848	-25.2427	26471
8973	-7.38815e+06	4.61449e+06	309.806	-21.6055	32177
8974	-7.40311e+06	4.69941e+06	361.998	-24.4217	28099
8975	-7.3882e+06	4.61448e+06	309.806	-21.6055	32177
8976	-7.39141e+06	4.6471e+06	336.992	-22.374	31383
8978	-7.30902e+06	4.70385e+06	475.362	-24.1036	28148
8979	-7.275e+06	4.69892e+06	413.411	-23.3166	29915
8980	-7.20456e+06	4.69486e+06	426.507	-23.3284	28119
8981	-7.23259e+06	4.68749e+06	436.029	-23.1404	29121
8982	-7.16415e+06	4.69452e+06	441.755	-22.8408	28647
8984	-1.17713e+07	4.70708e+06	-157.41	-12.9307	39815
8985	-1.17713e+07	4.70708e+06	-157.41	-12.9307	39815
8986	-1.17713e+07	4.70708e+06	-157.41	-12.9307	39815
8987	-1.17713e+07	4.70708e+06	-157.41	-12.9307	39815
8988	-1.17713e+07	4.70708e+06	-157.41	-12.9307	39815
8989	-1.17713e+07	4.70708e+06	-157.41	-12.9307	39815
8990	-1.17713e+07	4.70708e+06	-157.41	-12.9307	39815
8991	-1.17713e+07	4.70708e+06	-157.41	-12.9307	39815
8992	-1.17713e+07	4.70708e+06	-157.41	-12.9307	39815
8993	-1.0793e+07	4.77366e+06	-9.1544	-27.2298	21041
8994	-1.07746e+07	4.71861e+06	-6.53466	-27.3951	20647
8995	-1.07993e+07	4.77267e+06	-187.748	-25.9684	24518
8996	-1.0793e+07	4.77358e+06	-9.1544	-27.2298	21041
8997	-1.06555e+07	4.73471e+06	-192.139	-32.34	18005
8998	-1.01359e+07	4.76255e+06	-179.156	-25.0637	22096
8999	-1.01391e+07	4.76353e+06	-142.127	-25.5963	20717
9000	-1.01369e+07	4.76337e+06	-179.156	-25.0637	22096
9001	-1.01391e+07	4.76308e+06	-142.127	-25.5963	20717
9002	-1.01455e+07	4.76774e+06	-135.49	-25.8533	20163
9003	-1.01432e+07	4.76308e+06	-142.127	-25.5963	20717
9004	-1.01469e+07	4.75774e+06	-142.127	-25.5963	20717
9005	-1.01396e+07	4.7662e+06	-142.127	-25.5963	20717
9006	-1.01369e+07	4.76337e+06	-179.156	-25.0637	22096
9007	-1.01389e+07	4.76248e+06	-142.127	-25.5963	20717
9008	-1.01751e+07	4.77054e+06	81.2452	-30.5162	11177
9009	-1.01451e+07	4.76197e+06	-142.127	-25.5963	20717
9010	-1.01655e+07	4.71577e+06	19.829	-26.8999	15997
9011	-1.01402e+07	4.76599e+06	-142.127	-25.5963	20717
9012	-1.01136e+07	4.79153e+06	-125.703	-25.8279	19548
9013	-1.00735e+07	4.76041e+06	-201.05	-25.6917	22824
9014	-1.00027e+07	4.72931e+06	-263.974	-27.134	24828
9015	-9.87566e+06	4.79272e+06	-179.44	-26.0839	25667
9016	-9.69485e+06	4.72438e+06	-120.486	-26.1351	27944
9017	-9.70893e+06	4.72598e+06	-133.568	-25.8207	27694
9018	-9.6404e+06	4.7241e+06	-103.201	-26.3587	29341
9019	-9.55933e+06	4.7906e+06	3.26756	-28.7066	26398
9020	-9.46054e+06	4.75835e+06	32.2515	-28.4262	28430
9021	-9.45768e+06	4.79268e+06	20.363	-28.9734	27799
9022	-9.54708e+06	4.72506e+06	-42.6042	-27.6521	28440
9023	-9.50413e+06	4.79164e+06	3.26229	-29.0513	27219
9024	-9.45545e+06	4.7652e+06	34.9423	-28.4262	28509
9025	-9.41675e+06	4.79224e+06	51.8885	-28.9054	28512
9026	-9.37773e+06	4.79608e+06	42.232	-28.9843	28461
9027	-9.37271e+06	4.79225e+06	36.2695	-29.041	28498
9028	-9.4241e+06	4.79347e+06	49.4436	-28.8889	28408
9029	-9.37608e+06	4.71224e+06	93.5345	-27.9805	28866
9030	-9.34112e+06	4.77119e+06	46.5811	-28.5933	29298
9031	-9.35745e+06	4.79608e+06	31.7267	-28.8738	28992
9032	-9.2858e+06	4.71986e+06	108.857	-27.4069	30787
9033	-9.32719e+06	4.71829e+06	103.771	-27.6766	29770
9034	-9.32959e+06	4.73308e+06	96.8926	-27.9672	29276
9035	-9.32912e+06	4.78369e+06	45.1177	-29.0241	29045
9036	-9.29632e+06	4.72178e+06	114.25	-27.5377	30424
9037	-9.27578e+06	4.77087e+06	136.222	-29.3926	28131
9038	-9.24461e+06	4.78294e+06	134.423	-29.415	28296
9039	-9.24372e+06	4.79408e+06	140.094	-29.7024	27977
9040	-9.22408e+06	4.77972e+06	150.338	-29.6218	28188
9041	-9.20806e+06	4.74876e+06	135.052	-28.7653	29298
9042	-9.20422e+06	4.70987e+06	143.318	-27.5062	30994
9043	-9.24908e+06	4.77732e+06	137.2	-29.4836	28151
9044	-9.26149e+06	4.72885e+06	97.6293	-27.8564	30358
9045	-9.23318e+06	4.77404e+06	127.929	-29.1506	28700
9046	-9.18679e+06	4.7164e+06	166.301	-27.7125	30587
9047	-9.2355e+06	4.71924e+06	93.0795	-27.5815	30964
9048	-9.15491e+06	4.7424e+06	234.752	-29.2821	28569
9049	-9.09094e+06	4.7453e+06	239.428	-29.5845	27950
9050	-9.09328e+06	4.77893e+06	262.913	-30.4749	26673
9051	-9.1102e+06	4.75416e+06	247.862	-29.7892	27843
9052	-9.10939e+06	4.72846e+06	232.888	-29.2042	28733
9053	-9.02785e+06	4.74866e+06	237.514	-29.6429	27365
9054	-8.98406e+06	4.72786e+06	245.904	-28.6053	27903
9055	-9.02795e+06	4.7181e+06	232.639	-29.4068	27985
9056	-8.9877e+06	4.73259e+06	245.325	-28.761	27814
9057	-8.97484e+06	4.75399e+06	253.54	-28.6036	27478
9058	-9.06795e+06	4.74178e+06	236.653	-29.7129	27724
9059	-8.9877e+06	4.73259e+06	245.325	-28.761	27814
9060	-8.92671e+06	4.75318e+06	217.317	-28.3152	28733
9061	-8.89109e+06	4.75153e+06	208.951	-28.1795	29427
9062	-8.89118e+06	4.71934e+06	200.782	-27.5772	29926
9063	-8.9327e+06	4.74726e+06	223.078	-28.3933	28492
9064	-8.9327e+06	4.72573e+06	212.738	-27.9289	29042
9065	-8.88735e+06	4.74041e+06	205.136	-27.947	29775
9066	-8.93451e+06	4.72557e+06	212.738	-27.9289	29042
9067	-8.85185e+06	4.74734e+06	220.899	-28.3055	29811
9068	-8.85033e+06	4.71632e+06	214.596	-27.2981	30503
9069	-8.79655e+06	4.74648e+06	271.977	-28.7277	29114
9070	-8.70439e+06	4.79793e+06	300.429	-29.9724	27273
9071	-8.74308e+06	4.79042e+06	277.372	-29.1007	28045
9072	-8.70435e+06	4.75403e+06	291.778	-28.9095	28370
9073	-8.74914e+06	4.75172e+06	308.738	-28.9954	28234
9074	-8.74254e+06	4.72256e+06	317.683	-28.5418	28785
9075	-8.77315e+06	4.78622e+06	256.373	-29.5874	27875
9076	-8.66052e+06	4.78429e+06	267.474	-29.5462	27889
9077	-8.67542e+06	4.7304e+06	262.718	-28.4647	28930
9078	-8.62228e+06	4.71952e+06	289.992	-28.1481	28950
9079	-8.60776e+06	4.78388e+06	277.887	-29.6074	27462
9080	-8.66444e+06	4.7104e+06	245.689	-28.0095	29261
9081	-8.63679e+06	4.75727e+06	268.716	-29.1233	28113
9082	-8.57236e+06	4.75553e+06	281.012	-28.9318	27844
9083	-8.50972e+06	4.72086e+06	293.25	-27.9483	28484
9084	-8.54451e+06	4.79379e+06	239.422	-29.5426	27311
9085	-8.57808e+06	4.72373e+06	283.943	-28.0386	28854
9086	-8.51246e+06	4.76526e+06	249.71	-28.7525	27620
9087	-8.548e+06	4.7078e+06	280.837	-27.7447	29096
9088	-8.46555e+06	4.72499e+06	316.798	-27.1953	28917
9089	-8.47377e+06	4.77961e+06	258.877	-28.74	27387
9090	-8.41789e+06	4.71913e+06	341.361	-27.1013	28477
9091	-8.43311e+06	4.79993e+06	297.947	-29.1983	26311
9092	-8.42863e+06	4.74092e+06	313.065	-27.6509	27976
9093	-8.30904e+06	4.75424e+06	307.174	-27.8418	26669
9094	-8.38405e+06	4.7451e+06	303.008	-27.5009	27464
9095	-8.33126e+06	4.78144e+06	295.634	-28.2617	26133
9096	-8.38397e+06	4.71111e+06	388.87	-27.1454	27285
9097	-8.30286e+06	4.7141e+06	339.404	-27.2561	27806
9098	-8.34373e+06	4.73646e+06	336.529	-27.4512	27406
9099	-8.24897e+06	4.78802e+06	320.412	-28.3819	25298
9100	-8.20187e+06	4.7218e+06	375.318	-28.1321	24825
9101	-8.2226e+06	4.7782e+06	299.255	-28.0844	26053
9102	-8.20221e+06	4.74961e+06	328.775	-27.9775	25917
9103	-8.23976e+06	4.72922e+06	356.266	-27.8237	25723
9104	-8.27086e+06	4.72309e+06	331.48	-27.3691	26792
9105	-8.12688e+06	4.71234e+06	287.082	-27.0874	26570
9106	-8.16489e+06	4.72026e+06	314.106	-28.1425	25218
9107	-8.12645e+06	4.76201e+06	306.517	-28.2341	25319
9108	-8.1246e+06	4.73933e+06	316.308	-27.9909	25358
9109	-8.0445e+06	4.737e+06	335.668	-27.7868	24977
9110	-8.08248e+06	4.72097e+06	358.6	-27.8456	24810
9111	-8.03764e+06	4.78988e+06	281.816	-28.0313	25183
9112	-7.96359e+06	4.78285e+06	385.34	-28.1263	23625
9113	-7.98886e+06	4.75857e+06	369.848	-27.9771	24117
9114	-7.93813e+06	4.78942e+06	374.04	-28.0616	23423
9115	-7.95259e+06	4.74614e+06	356.187	-27.0695	24773
9116	-8.001e+06	4.79004e+06	354.981	-28.1577	23975
9117	-7.86112e+06	4.7508e+06	373.1	-26.5025	24995
9118	-7.90126e+06	4.78812e+06	351.064	-27.8327	23312
9119	-7.82432e+06	4.7358e+06	423.062	-25.9288	25232
9120	-7.86324e+06	4.71193e+06	379.821	-25.5324	26356
9121	-7.90368e+06	4.73669e+06	382.564	-26.3091	25501
9122	-7.85068e+06	4.78661e+06	341.393	-26.997	24609
9123	-7.90504e+06	4.762e+06	377.012	-27.1354	24009
9124	-7.75119e+06	4.80385e+06	384.042	-27.5529	23006
9125	-7.74282e+06	4.72561e+06	393.336	-25.3131	25651
9126	-7.77529e+06	4.73354e+06	385.866	-25.3375	25885
9127	-7.77496e+06	4.75809e+06	354.283	-26.2353	24770
9128	-7.75289e+06	4.77414e+06	341.882	-26.5702	24499
9129	-7.7924e+06	4.74459e+06	400.933	-25.8852	25146
9130	-7.77846e+06	4.71658e+06	439.043	-25.1973	25626
9131	-7.79385e+06	4.78224e+06	370.067	-27.1301	23453
9132	-7.71709e+06	4.75301e+06	366.154	-25.837	25491
9133	-7.63081e+06	4.77083e+06	513.802	-26.4709	24400
9134	-7.66732e+06	4.73741e+06	477.053	-25.6666	25360
9135	-7.71042e+06	4.79578e+06	432.505	-27.1938	23436
9136	-7.66721e+06	4.78645e+06	482.46	-26.618	24210
9137	-7.57317e+06	4.70811e+06	382.199	-25.8968	25138
9138	-7.55978e+06	4.75316e+06	387.523	-26.9204	24016
9139	-7.59495e+06	4.75546e+06	544.5	-27.3357	22760
9140	-7.45502e+06	4.72375e+06	396.21	-25.5859	25998
9141	-7.43568e+06	4.80095e+06	442.068	-27.3757	23339
9142	-7.52381e+06	4.74768e+06	335.6	-26.4764	24872
9143	-7.43678e+06	4.78242e+06	432.942	-26.8874	24029
9144	-7.50842e+06	4.79633e+06	393.782	-27.7888	22659
9145	-7.4682e+06	4.75903e+06	375.839	-26.4431	24885
9146	-7.45515e+06	4.74606e+06	389.471	-25.8552	25676
9147	-7.48906e+06	4.76664e+06	365.441	-26.6549	24570
9148	-7.35363e+06	4.77597e+06	539.211	-27.2023	23079
9149	-7.40887e+06	4.74756e+06	419.98	-26.0332	25516
9150	-7.37709e+06	4.74308e+06	429.882	-25.6173	26285
9151	-7.40129e+06	4.79012e+06	447.913	-26.9691	23978
9152	-7.35708e+06	4.71121e+06	420.68	-24.5194	28038
9153	-7.26615e+06	4.78065e+06	529.831	-26.0409	25338
9154	-7.30422e+06	4.79715e+06	585.929	-27.8869	21717
9155	-7.24661e+06	4.74021e+06	491.118	-24.2257	28262
9156	-7.27221e+06	4.72763e+06	450.3	-23.9612	28991
9157	-7.24947e+06	4.70775e+06	407.785	-23.0665	30180
9158	-7.29339e+06	4.7672e+06	483.617	-26.1097	25777
9159	-7.32598e+06	4.7478e+06	499.19	-25.9548	25900
9160	-7.14716e+06	4.80064e+06	515.883	-24.6004	27969
9161	-7.19275e+06	4.79157e+06	689.348	-26.7212	23687
9162	-7.17633e+06	4.78969e+06	599.628	-25.5742	26048
9163	-7.15488e+06	4.73531e+06	480.928	-23.0985	28778
9164	-7.22847e+06	4.7629e+06	565.566	-25.6853	25871
9165	-7.18745e+06	4.7871e+06	655.385	-26.2823	24623
9166	-7.18745e+06	4.7871e+06	655.385	-26.2823	24623
9167	-7.1993e+06	4.76227e+06	549.398	-24.9792	26931
9168	-7.16375e+06	4.78401e+06	506.31	-24.2605	28625
9169	-7.23586e+06	4.79061e+06	624.022	-26.6027	23925
9170	-7.17947e+06	4.75005e+06	512.47	-24.0966	28113
9173	-7.10027e+06	4.77871e+06	449.857	-23.1069	27863
9175	-7.1373e+06	4.78275e+06	410.933	-22.7172	30231
9178	-7.01253e+06	4.79888e+06	482.345	-23.4706	25692
9179	-1.19643e+07	4.80464e+06	650.028	-12.8543	22057
9180	-1.19643e+07	4.80464e+06	650.028	-12.8543	22057
9181	-1.19643e+07	4.80464e+06	650.028	-12.8543	22057
9182	-1.17776e+07	4.83077e+06	636.193	-21.6215	17750
9183	-1.17713e+07	4.80464e+06	466.242	-18.8138	25139
9184	-1.17713e+07	4.80464e+06	466.242	-18.8138	25139
9185	-1.17713e+07	4.80464e+06	466.242	-18.8138	25139
9186	-1.13967e+07	4.84432e+06	-377.897	-24.0082	21434
9187	-1.11301e+07	4.81732e+06	-93.7606	-27.9884	15303
9188	-1.09123e+07	4.85431e+06	-305.721	-26.0498	23127
9189	-1.07985e+07	4.83321e+06	9.36909	-27.6958	19901
9190	-1.07822e+07	4.87121e+06	78.5033	-30.0349	14919
9191	-1.07979e+07	4.87643e+06	-81.4102	-28.1064	21362
9193	-1.03173e+07	4.87123e+06	-172.911	-29.8122	15451
9194	-1.02028e+07	4.86721e+06	-96.4293	-29.0976	14039
9195	-9.85337e+06	4.81376e+06	-174.213	-26.3826	25562
9196	-9.87364e+06	4.81557e+06	-174.876	-26.1213	25471
9197	-9.70483e+06	4.89292e+06	-30.453	-29.7008	23216
9198	-9.66735e+06	4.84419e+06	-25.712	-29.4592	23752
9199	-9.62226e+06	4.84268e+06	1.0994	-29.9758	23425
9200	-9.46719e+06	4.80464e+06	18.2581	-29.2015	27509
9201	-9.54954e+06	4.82612e+06	23.6412	-29.3235	25661
9202	-9.41421e+06	4.82284e+06	60.8723	-29.4886	27769
9203	-9.4551e+06	4.84271e+06	57.5804	-30.0042	26227
9204	-9.42337e+06	4.83517e+06	58.1925	-29.5911	27427
9205	-9.37199e+06	4.82614e+06	68.8188	-29.7552	27755
9206	-9.45323e+06	4.83872e+06	57.5804	-30.0042	26227
9207	-9.417e+06	4.85042e+06	64.0473	-30.2598	26726
9208	-9.32383e+06	4.82646e+06	66.5687	-29.8369	28080
9209	-9.32494e+06	4.8602e+06	79.1316	-30.639	27101
9210	-9.29045e+06	4.82674e+06	97.8643	-30.0061	27829
9211	-9.33875e+06	4.89277e+06	89.2745	-31.5405	26064
9212	-9.28421e+06	4.8555e+06	86.971	-30.4051	27539
9213	-9.2733e+06	4.81567e+06	129.76	-29.9478	27673
9214	-9.33118e+06	4.88838e+06	91.6103	-31.52	26125
9215	-9.27349e+06	4.86347e+06	85.3276	-30.4819	27551
9216	-9.2769e+06	4.83358e+06	102.408	-30.1051	27943
9217	-9.29694e+06	4.84847e+06	81.3577	-30.4142	27462
9218	-9.21887e+06	4.83745e+06	160.247	-30.7556	26937
9219	-9.24434e+06	4.87084e+06	147.654	-31.1347	26608
9220	-9.11806e+06	4.8705e+06	223.228	-31.6348	26146
9221	-9.09307e+06	4.80732e+06	252.127	-30.9119	26470
9222	-9.07115e+06	4.83658e+06	230.26	-30.9266	26684
9223	-9.15972e+06	4.83652e+06	232.231	-31.0815	26368
9224	-8.84941e+06	4.8372e+06	192.472	-29.9941	28380
9225	-8.73833e+06	4.84989e+06	252.787	-30.5511	27777
9226	-8.75532e+06	4.82438e+06	251.085	-29.6881	27982
9227	-8.69687e+06	4.83889e+06	303.806	-30.8115	26655
9228	-8.61451e+06	4.8243e+06	251.062	-30.1052	27355
9229	-8.66398e+06	4.81321e+06	284.127	-30.4546	27076
9230	-8.67521e+06	4.87694e+06	312.64	-31.3865	25633
9231	-8.63833e+06	4.8441e+06	282.737	-30.8896	26609
9232	-8.62031e+06	4.80765e+06	256.955	-30.0268	27490
9233	-8.6162e+06	4.8759e+06	282.66	-31.338	25613
9234	-8.57617e+06	4.83757e+06	217.892	-29.9199	27177
9235	-8.53204e+06	4.83256e+06	248.939	-29.7676	26810
9236	-8.53251e+06	4.89461e+06	322.884	-31.1823	24446
9237	-8.49908e+06	4.88659e+06	319.82	-30.309	25201
9238	-8.565e+06	4.89065e+06	307.238	-31.4112	24679
9239	-8.53235e+06	4.86131e+06	289.828	-30.3574	25718
9240	-8.45704e+06	4.89102e+06	294.378	-29.2363	25398
9241	-8.40593e+06	4.80709e+06	307.259	-29.5654	25597
9242	-8.43085e+06	4.85054e+06	308.598	-29.2091	25374
9243	-8.40112e+06	4.85368e+06	335.175	-29.282	25127
9244	-8.48909e+06	4.84704e+06	295.057	-29.7738	25909
9245	-8.47755e+06	4.81796e+06	275.886	-29.4025	26446
9246	-8.32316e+06	4.83665e+06	351.827	-28.9306	24852
9247	-8.32305e+06	4.80889e+06	341.311	-28.9467	24900
9248	-8.36484e+06	4.80826e+06	320.134	-29.1321	25369
9249	-8.35497e+06	4.8953e+06	345.082	-28.338	25310
9250	-8.3697e+06	4.8576e+06	399.657	-29.0671	25269
9251	-8.3603e+06	4.83189e+06	346.773	-29.121	25285
9252	-8.28437e+06	4.82822e+06	318.579	-28.9823	24713
9253	-8.29718e+06	4.89254e+06	313.346	-28.5637	24835
9254	-8.25245e+06	4.89267e+06	285.723	-28.5023	25108
9255	-8.20138e+06	4.86671e+06	343.602	-29.1984	23304
9256	-8.20753e+06	4.81347e+06	273.997	-28.4457	25781
9257	-8.24245e+06	4.86652e+06	299.889	-28.9348	24426
9258	-8.20658e+06	4.89265e+06	297.253	-28.8743	23914
9259	-8.24996e+06	4.81774e+06	306.469	-28.8119	24830
9260	-8.28421e+06	4.86214e+06	303.212	-28.9863	24717
9261	-8.2416e+06	4.84289e+06	301.069	-28.937	24569
9262	-8.16212e+06	4.89004e+06	381.576	-29.9193	22229
9263	-8.11148e+06	4.89043e+06	283.694	-28.9427	23387
9264	-8.20131e+06	4.84283e+06	314.3	-28.9148	24259
9265	-8.16054e+06	4.81602e+06	292.156	-28.4502	25480
9266	-8.11686e+06	4.86215e+06	269.676	-28.5918	24641
9267	-8.05633e+06	4.86998e+06	224.025	-28.2574	24666
9268	-8.06841e+06	4.83951e+06	260.728	-28.3706	24804
9269	-8.02238e+06	4.83908e+06	253.257	-28.0136	25056
9270	-8.05656e+06	4.89265e+06	207.17	-28.2364	24615
9271	-8.01384e+06	4.86185e+06	252.676	-28.0895	24933
9272	-7.92675e+06	4.84963e+06	320.863	-27.7321	24127
9273	-7.97113e+06	4.8541e+06	277.281	-27.8661	24946
9274	-7.96994e+06	4.81917e+06	322.525	-28.0439	24059
9275	-7.83204e+06	4.85276e+06	434.309	-28.4512	22832
9276	-7.83445e+06	4.82118e+06	398.094	-27.9612	23578
9277	-7.87904e+06	4.85633e+06	337.211	-27.6374	24189
9278	-7.90236e+06	4.81604e+06	359.233	-28.2948	23109
9279	-7.83866e+06	4.88319e+06	372.174	-27.9954	23340
9280	-7.86102e+06	4.85716e+06	363.647	-27.914	23771
9281	-7.86675e+06	4.81718e+06	359.857	-27.8153	24041
9282	-7.79176e+06	4.8351e+06	354.251	-27.7266	23252
9283	-7.74331e+06	4.83415e+06	435.834	-28.1084	22522
9284	-7.72929e+06	4.87049e+06	501.822	-28.1021	22175
9285	-7.79345e+06	4.8063e+06	362.268	-27.498	23161
9286	-7.64869e+06	4.88306e+06	621.467	-29.0199	20364
9287	-7.69604e+06	4.84346e+06	555.002	-28.1981	21666
9288	-7.66327e+06	4.82312e+06	535.467	-27.9203	22323
9289	-7.64523e+06	4.85487e+06	585.31	-28.7586	20962
9290	-7.57168e+06	4.80467e+06	471.017	-28.1451	22032
9291	-7.5457e+06	4.84727e+06	481.088	-29.3914	19788
9292	-7.5887e+06	4.84506e+06	559.853	-29.2317	20255
9293	-7.62239e+06	4.81696e+06	515.53	-28.0569	22221
9294	-7.58057e+06	4.88171e+06	637.644	-30.2782	18002
9295	-7.51624e+06	4.87627e+06	510.533	-30.6995	17486
9296	-7.45393e+06	4.87914e+06	354.892	-29.9025	18432
9297	-7.49088e+06	4.82798e+06	422.077	-29.0478	20366
9298	-7.43524e+06	4.8381e+06	437.062	-28.8593	20613
9299	-7.39685e+06	4.80708e+06	446.353	-27.3573	23341
9300	-7.38173e+06	4.84778e+06	518.673	-29.6343	19154
9301	-7.38294e+06	4.88096e+06	378.013	-28.8996	20584
9302	-7.33485e+06	4.85485e+06	447.12	-28.3897	21445
9303	-7.37183e+06	4.80959e+06	443.984	-27.3319	23135
9304	-7.26891e+06	4.81015e+06	658.033	-28.0801	21814
9305	-7.33209e+06	4.82171e+06	469.369	-27.8452	21982
9306	-7.26603e+06	4.8673e+06	585.798	-29.0827	20231
9307	-7.29534e+06	4.84715e+06	516.082	-28.5634	21290
9308	-7.31369e+06	4.88382e+06	512.762	-29.1032	20591
9309	-7.23972e+06	4.83648e+06	653.832	-28.1902	21966
9310	-7.21379e+06	4.87353e+06	646.055	-29.2728	20238
9311	-7.14256e+06	4.81913e+06	584.157	-25.9516	25821
9312	-7.16484e+06	4.89015e+06	593.939	-28.988	21440
9313	-7.20664e+06	4.81836e+06	637.9	-27.4019	23105
9314	-7.16954e+06	4.84346e+06	554.387	-27.2108	23913
9315	-7.08594e+06	4.82465e+06	643.651	-25.8146	24393
9316	-7.0793e+06	4.82644e+06	643.651	-25.8146	24393
9317	-7.04712e+06	4.85848e+06	568.568	-27.2887	22971
9318	-7.09676e+06	4.84797e+06	615.714	-27.55	22754
9319	-7.06213e+06	4.87603e+06	655.521	-28.6466	21030
9320	-7.08429e+06	4.89932e+06	677.796	-30.151	19278
9321	-7.10286e+06	4.84828e+06	614.268	-27.6313	22794
9322	-7.09676e+06	4.84797e+06	615.714	-27.55	22754
9323	-7.06213e+06	4.87603e+06	655.521	-28.6466	21030
9324	-7.10345e+06	4.84817e+06	614.268	-27.6313	22794
9325	-7.0447e+06	4.88499e+06	611.217	-28.3632	21909
9326	-7.0671e+06	4.88115e+06	689.066	-29.3046	20128
9327	-7.11559e+06	4.87824e+06	556.531	-28.7295	21893
9328	-7.06242e+06	4.82266e+06	532.121	-25.4627	24736
9329	-7.08184e+06	4.83604e+06	644.402	-26.4202	23637
9330	-7.05607e+06	4.82441e+06	472.115	-25.0634	25246
9331	-7.07384e+06	4.8675e+06	660.892	-28.8107	20862
9332	-7.08901e+06	4.84347e+06	627.28	-27.0223	23284
9333	-7.06242e+06	4.82266e+06	532.121	-25.4627	24736
9334	-7.06636e+06	4.85058e+06	586.836	-27.1311	22892
9335	-7.04599e+06	4.83164e+06	0	0	0
9336	-7.06989e+06	4.82185e+06	599.158	-25.7329	24439
9337	-7.06242e+06	4.82266e+06	532.121	-25.4627	24736
9339	-7.01251e+06	4.90023e+06	494.793	-27.7891	24263
9340	-7.01793e+06	4.88232e+06	517.516	-27.2791	24303
9341	-7.00643e+06	4.87795e+06	500.984	-26.8898	24832
9342	-6.96915e+06	4.88053e+06	623.748	-27.1873	22851
9343	-6.97976e+06	4.88016e+06	611.66	-27.3955	22886
9344	-6.97663e+06	4.88178e+06	623.748	-27.1873	22851
9345	-6.98258e+06	4.88847e+06	605.257	-27.8047	22682
9347	-6.99156e+06	4.84836e+06	582.846	-26.1263	23702
9348	-6.97113e+06	4.88244e+06	623.748	-27.1873	22851
9349	-6.94993e+06	4.83804e+06	628.486	-25.349	23684
9350	-7.00088e+06	4.89847e+06	484.289	-27.6636	24362
9351	-6.97154e+06	4.88252e+06	623.748	-27.1873	22851
9352	-7.0146e+06	4.83698e+06	0	0	0
9353	-7.0369e+06	4.84393e+06	511.722	-25.9219	24153
9354	-6.95693e+06	4.84023e+06	628.486	-25.349	23684
9357	-6.96207e+06	4.84941e+06	629.051	-25.8189	23484
9358	-6.95661e+06	4.83901e+06	628.486	-25.349	23684
[truncated: 522 more rows]
