# Supplementary material for: Climate-change-induced range shifts of three allergenic ragweeds (AmbrosiaL.) in Europe and their potential impact on human health
Source: PeerJ journal article supplement (doi:10.7717/peerj.3104), 2017-03-16

*A. artemisiifolia*

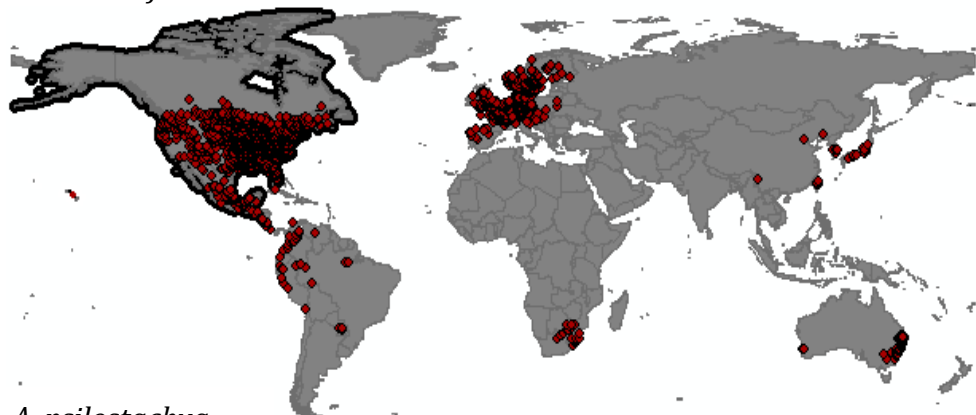

*A. psilostachya*

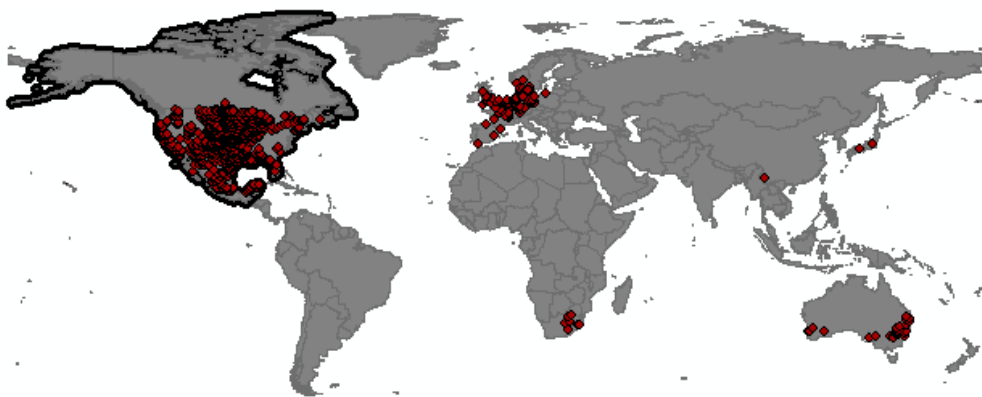

*A. trifida*

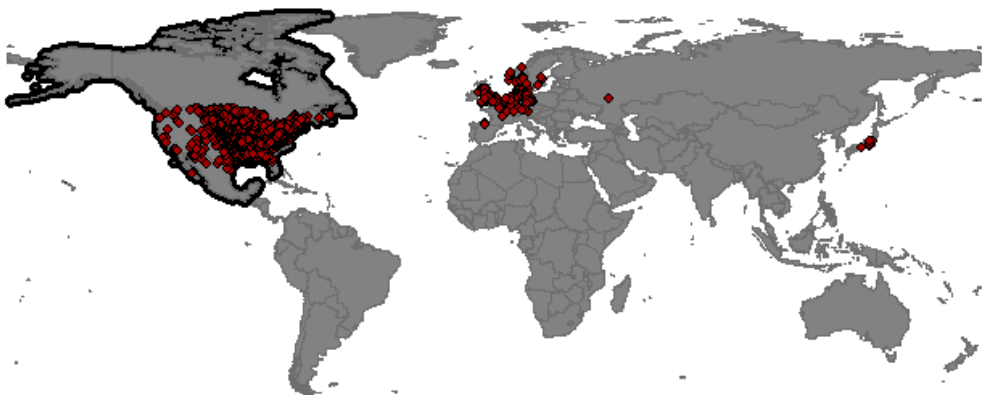

Supplement: Figure_S1.pdf [file Figure_S1.pdf]
