# Supplementary material for: Climate-change-induced range shifts of three allergenic ragweeds (Ambrosia L.) in Europe and their potential impact on human health
Source: PubMed Central journal article supplement (PMC5357339; doi:10.7717/peerj.3104), 2017-03-16
Supplement: peerj-05-3104-s004.pdf [file peerj-05-3104-s004.pdf]

**Current Climate****RCP 6.0 (2070–2099)****RCP 8.5 (2070–2099)***A. artemisiifolia*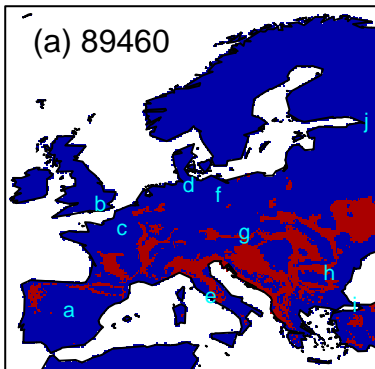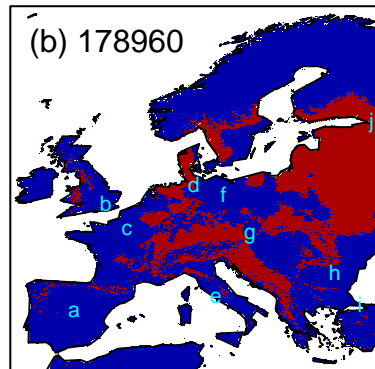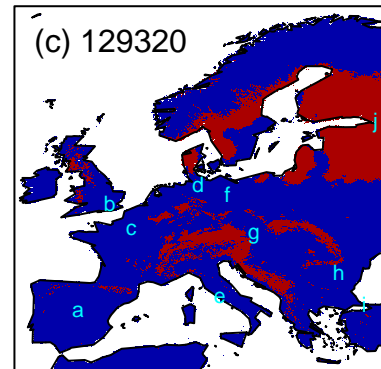*A. psilostachya*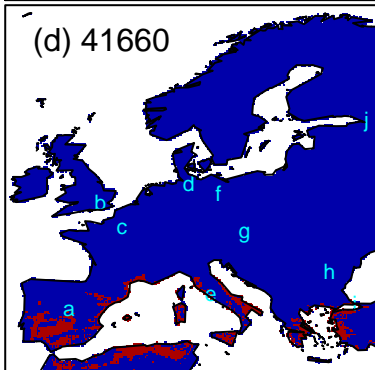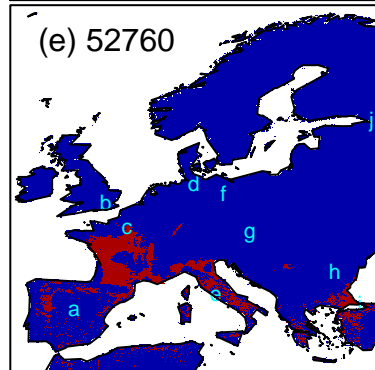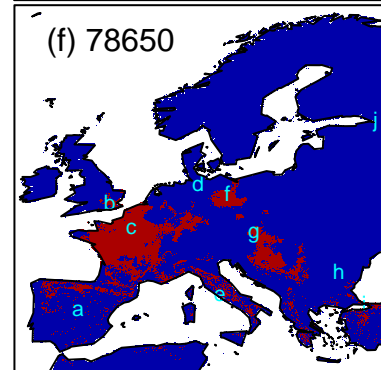*A. trifida*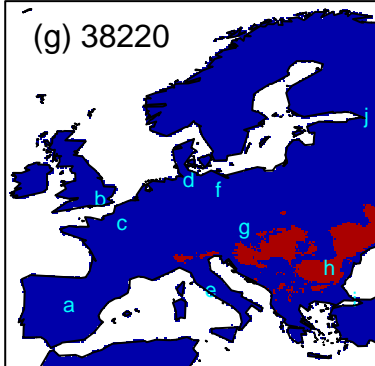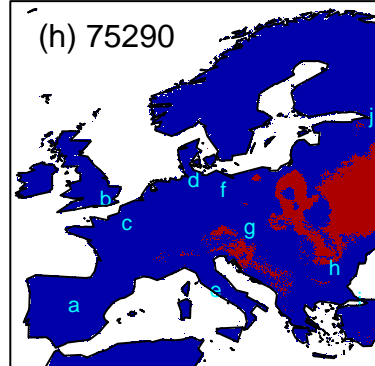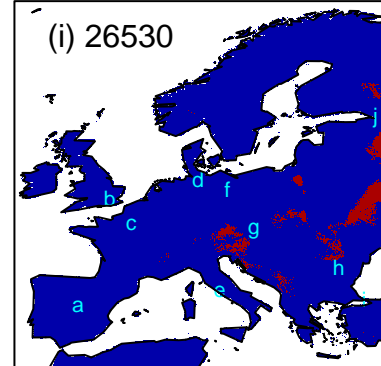

Non-HAR Area

HAR area
