# Supplementary material for: Climate-change-induced range shifts of three allergenic ragweeds (Ambrosia L.) in Europe and their potential impact on human health
Source: PubMed Central journal article supplement (PMC5357339; doi:10.7717/peerj.3104), 2017-03-16

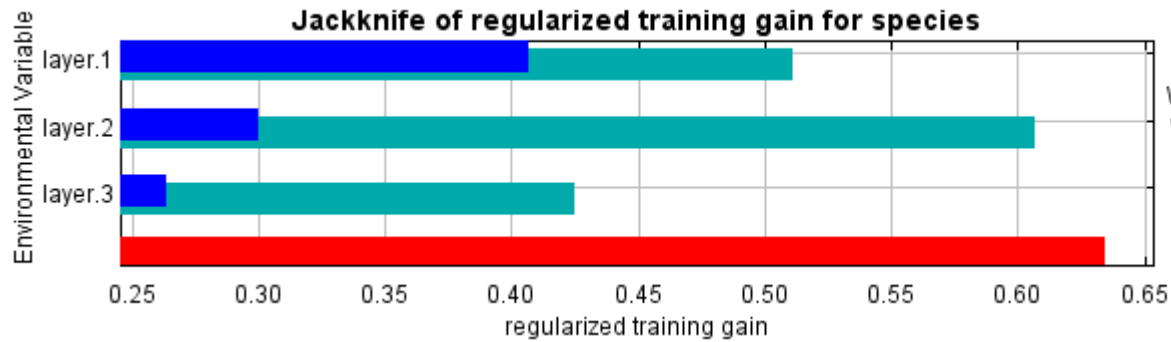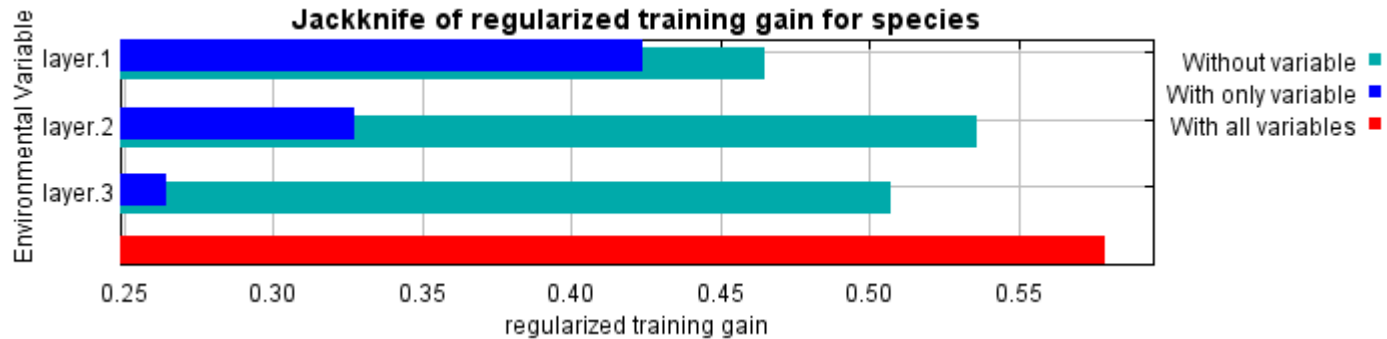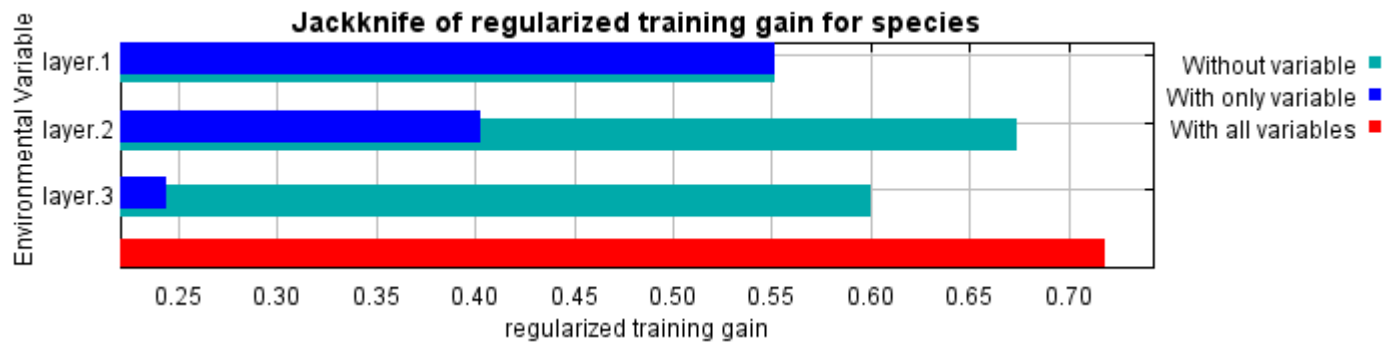

Supplement: peerj-05-3104-s005.pdf [file peerj-05-3104-s005.pdf]
