# Supplementary material for: Climate-change-induced range shifts of three allergenic ragweeds (Ambrosia L.) in Europe and their potential impact on human health
Source: PubMed Central journal article supplement (PMC5357339; doi:10.7717/peerj.3104), 2017-03-16
Supplement: peerj-05-3104-s006.pdf [file peerj-05-3104-s006.pdf]

Current Climate

RCP 6.0 (2070–2099)

RCP 8.5 (2070–2099)

*A. artemisiifolia*

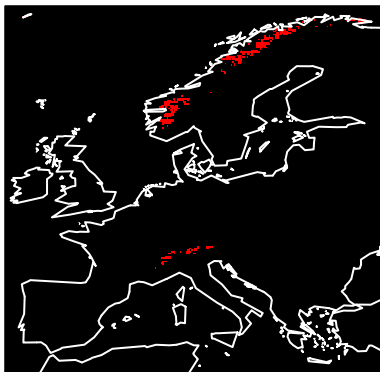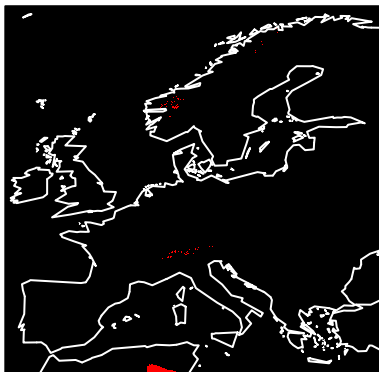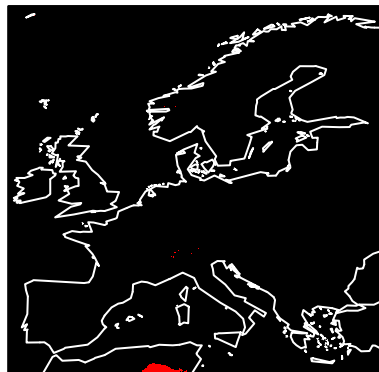

*A. psilostachya*

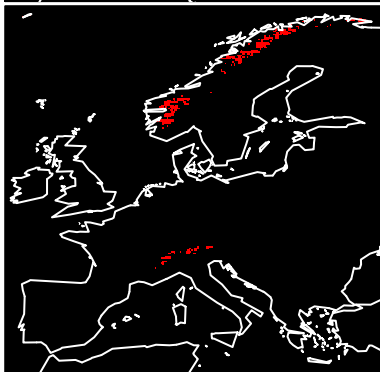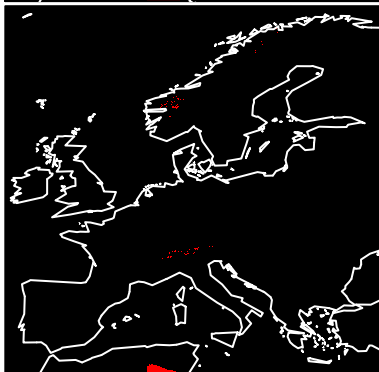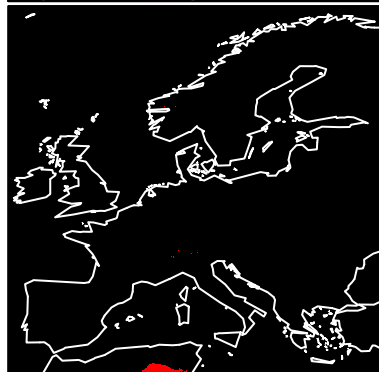

*A. trifida*

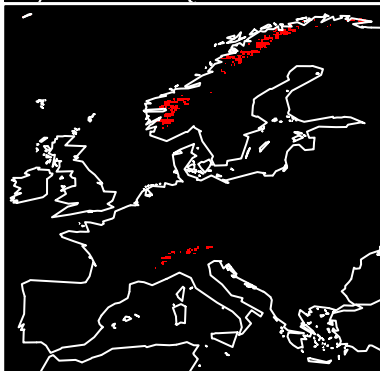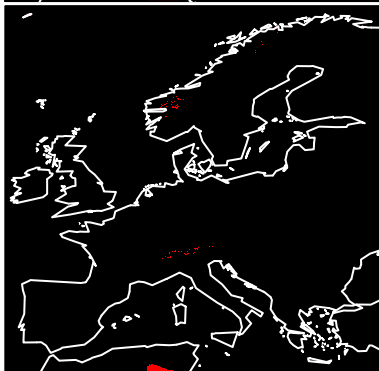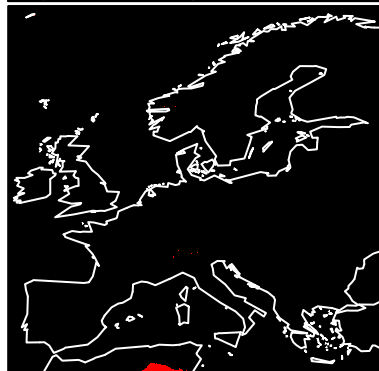

Not extrapolated

Extrapolated
