# Supplementary material for: Climate-change-induced range shifts of three allergenic ragweeds (Ambrosia L.) in Europe and their potential impact on human health
Source: PeerJ. 2017 Mar 16;5:e3104. doi: 10.7717/peerj.3104 (PMC5357339; doi:10.7717/peerj.3104)
Supplement: Supplemental Information 1 [file peerj-05-3104-s010.txt]

Species	behrm_x	behrm_y
Ambrosia_trifida	-6209913.54863000000	5188342.12112000000
Ambrosia_trifida	-7089059.81588000000	5229119.54205000000
Ambrosia_trifida	-7090205.32245000000	5232743.50713000000
Ambrosia_trifida	-7107590.27402000000	5232029.50894000000
Ambrosia_trifida	-5807892.47325000000	5282311.22013000000
Ambrosia_trifida	-7088599.89795000000	5271498.98185000000
Ambrosia_trifida	-7717280.37849000000	5021490.69112000000
Ambrosia_trifida	-7088525.71072000000	5243288.00539000000
Ambrosia_trifida	-7083700.81779000000	5243288.00539000000
Ambrosia_trifida	-7101390.22647000000	5225313.70724000000
Ambrosia_trifida	-10774333.45680000000	3093525.68783000000
Ambrosia_trifida	-10774301.03740000000	3093486.98320000000
Ambrosia_trifida	-9846424.89960000000	3497481.84696000000
Ambrosia_trifida	-9846424.89960000000	3497481.84696000000
Ambrosia_trifida	-10703126.58200000000	3735895.78399000000
Ambrosia_trifida	-10670311.59800000000	3698594.08709000000
Ambrosia_trifida	-10670321.24670000000	3698625.01487000000
Ambrosia_trifida	-10670321.24670000000	3698625.01487000000
Ambrosia_trifida	-10517111.64710000000	3799589.28624000000
Ambrosia_trifida	-10652833.10840000000	3799975.55208000000
Ambrosia_trifida	-10236132.98550000000	3506470.39329000000
Ambrosia_trifida	-10236132.98550000000	3506470.39329000000
Ambrosia_trifida	-10236132.98550000000	3506470.39329000000
Ambrosia_trifida	-10236132.98550000000	3506470.39329000000
Ambrosia_trifida	-10236132.98550000000	3506470.39329000000
Ambrosia_trifida	-10236132.98550000000	3506470.39329000000
Ambrosia_trifida	-10429780.95000000000	3695421.31931000000
Ambrosia_trifida	-10429780.95000000000	3695421.31931000000
Ambrosia_trifida	-10429819.54450000000	3695402.53629000000
Ambrosia_trifida	-10245878.09980000000	3496919.84046000000
Ambrosia_trifida	-8992526.14370000000	3641813.88974000000
Ambrosia_trifida	-8693646.38254000000	3627476.42566000000
Ambrosia_trifida	-8906567.48148000000	3638131.21688000000
Ambrosia_trifida	-8722264.21326000000	3602582.10214000000
Ambrosia_trifida	-8825396.46850000000	3618293.81617000000
Ambrosia_trifida	-8764592.74441000000	3584870.69264000000
Ambrosia_trifida	-8620671.87906000000	3647142.12668000000
Ambrosia_trifida	-8839298.21176000000	3673164.97492000000
Ambrosia_trifida	-8732190.72178000000	3671888.63561000000
Ambrosia_trifida	-7310186.53693000000	4483694.96355000000
Ambrosia_trifida	-8677142.40430000000	3666086.02958000000
Ambrosia_trifida	-8786422.76532000000	3647596.30630000000
Ambrosia_trifida	-8718187.66792000000	3649007.55305000000
Ambrosia_trifida	-11700949.09780000000	4500935.39844000000
Ambrosia_trifida	-7271370.10638000000	4665641.66389000000
Ambrosia_trifida	-9402507.92684000000	3224159.30412000000
Ambrosia_trifida	-8916377.72403000000	3691035.27873000000
Ambrosia_trifida	-8760564.44221000000	3661651.61327000000
Ambrosia_trifida	-8754299.58803000000	3707858.81578000000
Ambrosia_trifida	-8771481.86482000000	3681254.72531000000
Ambrosia_trifida	-8813955.12539000000	3687897.37871000000
Ambrosia_trifida	-9082253.56002000000	3669869.09072000000
Ambrosia_trifida	-9007742.03009000000	3684015.03591000000
Ambrosia_trifida	-9423030.55865000000	3370079.50328000000
Ambrosia_trifida	-8955426.20408000000	3688520.27590000000
Ambrosia_trifida	-8882904.22125000000	3681623.77987000000
Ambrosia_trifida	-8869501.31206000000	3681933.52843000000
Ambrosia_trifida	-8869308.33950000000	3682929.09031000000
Ambrosia_trifida	-7334379.50684000000	4382470.57792000000
Ambrosia_trifida	-7204556.73433000000	4694861.27097000000
Ambrosia_trifida	-8798390.92352000000	3700944.35138000000
Ambrosia_trifida	-8810450.74369000000	3709957.72970000000
Ambrosia_trifida	-7434347.97694000000	4587093.97020000000
Ambrosia_trifida	-7434347.97694000000	4587093.97020000000
Ambrosia_trifida	-7434364.37961000000	4587049.98678000000
Ambrosia_trifida	-7434364.37961000000	4587049.98678000000
Ambrosia_trifida	-7147159.45837000000	4800640.48229000000
Ambrosia_trifida	-8792987.69182000000	3709223.70725000000
Ambrosia_trifida	-8680256.01657000000	3702937.70689000000
Ambrosia_trifida	-7164153.58691000000	4694518.27839000000
Ambrosia_trifida	-6993624.70005000000	4843837.21157000000
Ambrosia_trifida	-8861841.26627000000	3841964.13155000000
Ambrosia_trifida	-8841962.19795000000	3817326.98096000000
Ambrosia_trifida	-7439727.08707000000	4377686.44750000000
Ambrosia_trifida	-8722558.49642000000	3728807.60431000000
Ambrosia_trifida	-7012531.18667000000	4798879.61169000000
Ambrosia_trifida	-8838183.79522000000	3737019.86507000000
Ambrosia_trifida	-8916502.67376000000	3739757.15069000000
Ambrosia_trifida	-8845159.17436000000	3893262.04797000000
Ambrosia_trifida	-8877075.48506000000	3724929.88861000000
Ambrosia_trifida	-8426397.33269000000	3725904.70823000000
Ambrosia_trifida	-7917572.49542000000	3571048.36406000000
Ambrosia_trifida	-8789281.65380000000	3718902.62706000000
Ambrosia_trifida	-8877004.08522000000	3776872.16283000000
Ambrosia_trifida	-7423091.88749000000	4602045.80043000000
Ambrosia_trifida	-7422110.62202000000	4601629.80955000000
Ambrosia_trifida	-7423075.48482000000	4602028.84204000000
Ambrosia_trifida	-7422072.99237000000	4601601.87645000000
Ambrosia_trifida	-7423091.88749000000	4602045.80043000000
Ambrosia_trifida	-7423091.88749000000	4602045.80043000000
Ambrosia_trifida	-7423075.48482000000	4602028.84204000000
Ambrosia_trifida	-7423075.48482000000	4602028.84204000000
Ambrosia_trifida	-7423075.48482000000	4602028.84204000000
Ambrosia_trifida	-7423091.88749000000	4602045.80043000000
Ambrosia_trifida	-7423091.88749000000	4602045.80043000000
Ambrosia_trifida	-7423091.88749000000	4602045.80043000000
Ambrosia_trifida	-7423075.48482000000	4602028.84204000000
Ambrosia_trifida	-7423091.88749000000	4602045.80043000000
Ambrosia_trifida	-7423075.48482000000	4602028.84204000000
Ambrosia_trifida	-7422110.62202000000	4601629.80955000000
Ambrosia_trifida	-7423075.48482000000	4602028.84204000000
Ambrosia_trifida	-7426163.04579000000	4599135.35496000000
Ambrosia_trifida	-7423075.48482000000	4602028.84204000000
Ambrosia_trifida	-7423075.48482000000	4602028.84204000000
Ambrosia_trifida	-7423075.48482000000	4602028.84204000000
Ambrosia_trifida	-7423091.88749000000	4602045.80043000000
Ambrosia_trifida	-7423075.48482000000	4602028.84204000000
Ambrosia_trifida	-7423750.88878000000	4598736.16199000000
Ambrosia_trifida	-7423075.48482000000	4602028.84204000000
Ambrosia_trifida	-7422110.62202000000	4601629.80955000000
Ambrosia_trifida	-7423091.88749000000	4602045.80043000000
Ambrosia_trifida	-7423091.88749000000	4602045.80043000000
Ambrosia_trifida	-7422072.99237000000	4601601.87645000000
Ambrosia_trifida	-7422072.99237000000	4601601.87645000000
Ambrosia_trifida	-7423708.43482000000	4598719.19580000000
Ambrosia_trifida	-7423091.88749000000	4602045.80043000000
Ambrosia_trifida	-7423091.88749000000	4602045.80043000000
Ambrosia_trifida	-7426200.67544000000	4599163.29764000000
Ambrosia_trifida	-8853989.21279000000	3923494.64291000000
Ambrosia_trifida	-6838334.85630000000	4961755.98110000000
Ambrosia_trifida	-8812133.46441000000	3878541.97520000000
Ambrosia_trifida	-6660896.58692000000	5091488.94521000000
Ambrosia_trifida	-8803677.40681000000	3918431.39489000000
Ambrosia_trifida	-8468332.58576000000	3935232.27384000000
Ambrosia_trifida	-8459407.60484000000	3938140.84149000000
Ambrosia_trifida	-9204084.85636000000	3642909.59949000000
Ambrosia_trifida	-8913169.07278000000	3967685.16377000000
Ambrosia_trifida	-8891755.87260000000	3930019.76106000000
Ambrosia_trifida	-8802958.96997000000	3957667.75026000000
Ambrosia_trifida	-7444381.19928000000	4534434.64707000000
Ambrosia_trifida	-8779139.98088000000	3958062.58958000000
Ambrosia_trifida	-7207447.94572000000	4734731.95446000000
Ambrosia_trifida	-11385381.06960000000	4093085.62809000000
Ambrosia_trifida	-8956623.59882000000	3731250.61427000000
Ambrosia_trifida	-8857415.05465000000	3966702.07532000000
Ambrosia_trifida	-7199303.53880000000	4762272.32384000000
Ambrosia_trifida	-8823971.36614000000	3963235.61252000000
Ambrosia_trifida	-8775187.90284000000	4016892.06384000000
Ambrosia_trifida	-7100270.98562000000	4778712.90154000000
Ambrosia_trifida	-8808975.46846000000	4014837.48707000000
Ambrosia_trifida	-8741175.52419000000	4051224.32234000000
Ambrosia_trifida	-7492766.56018000000	4329542.03836000000
Ambrosia_trifida	-7011335.72166000000	4888816.64038000000
Ambrosia_trifida	-8762073.48763000000	3973255.80926000000
Ambrosia_trifida	-7402851.57454000000	4501538.32661000000
Ambrosia_trifida	-7898167.17474000000	3656212.70770000000
Ambrosia_trifida	-8938173.49231000000	3872296.59994000000
Ambrosia_trifida	-8188505.00550000000	3761749.83806000000
Ambrosia_trifida	-8982390.25996000000	3848494.87253000000
Ambrosia_trifida	-7467803.62976000000	4346384.43405000000
Ambrosia_trifida	-6859296.50069000000	4877176.00928000000
Ambrosia_trifida	-8712484.36390000000	4044953.49240000000
Ambrosia_trifida	-7179469.81903000000	4750053.46124000000
Ambrosia_trifida	-6999623.25210000000	4870819.48957000000
Ambrosia_trifida	-7002035.40910000000	4884727.20785000000
Ambrosia_trifida	-6999623.25210000000	4870819.48957000000
Ambrosia_trifida	-9006083.43094000000	3730979.58742000000
Ambrosia_trifida	-7410518.76031000000	4519215.47542000000
Ambrosia_trifida	-7011097.40054000000	4933026.20134000000
Ambrosia_trifida	-6957079.55655000000	4849734.48254000000
Ambrosia_trifida	-6962074.65127000000	4849405.61129000000
Ambrosia_trifida	-8700330.95204000000	4087342.27258000000
Ambrosia_trifida	-6896141.71653000000	4884939.48872000000
Ambrosia_trifida	-6896141.71653000000	4884939.48872000000
Ambrosia_trifida	-8771983.97942000000	3875277.35672000000
Ambrosia_trifida	-8928451.05228000000	3790631.17118000000
Ambrosia_trifida	-8768874.80553000000	4071256.53140000000
Ambrosia_trifida	-9473488.05890000000	3252473.26399000000
Ambrosia_trifida	-7004063.16477000000	4956130.84468000000
Ambrosia_trifida	-8533660.55153000000	4036735.68260000000
Ambrosia_trifida	-8894868.52000000000	4081867.56130000000
Ambrosia_trifida	-8711469.32823000000	4120124.56357000000
Ambrosia_trifida	-7714593.82523000000	4128262.93666000000
Ambrosia_trifida	-8221863.20718000000	3746800.11972000000
Ambrosia_trifida	-7476641.77303000000	4576952.74023000000
Ambrosia_trifida	-7476625.37036000000	4576946.73413000000
Ambrosia_trifida	-7475542.79430000000	4578553.19003000000
Ambrosia_trifida	-7232587.44604000000	4687485.71595000000
Ambrosia_trifida	-8805270.39530000000	4075146.77366000000
Ambrosia_trifida	-8741394.06562000000	4116978.67082000000
Ambrosia_trifida	-7433785.46193000000	4592146.28492000000
Ambrosia_trifida	-7431003.76247000000	4598641.35041000000
Ambrosia_trifida	-7434171.40705000000	4602527.60151000000
Ambrosia_trifida	-7432981.73122000000	4597638.26725000000
Ambrosia_trifida	-7434171.40705000000	4602527.60151000000
Ambrosia_trifida	-7433013.57169000000	4597638.26725000000
Ambrosia_trifida	-7432981.73122000000	4597638.26725000000
Ambrosia_trifida	-7433013.57169000000	4597638.26725000000
Ambrosia_trifida	-7432981.73122000000	4597638.26725000000
Ambrosia_trifida	-7432981.73122000000	4597638.26725000000
Ambrosia_trifida	-7439276.11019000000	4596013.77489000000
Ambrosia_trifida	-7434187.80972000000	4602516.62917000000
Ambrosia_trifida	-7436465.85080000000	4597804.95840000000
Ambrosia_trifida	-7433785.46193000000	4592146.28492000000
Ambrosia_trifida	-7434943.29729000000	4598037.52106000000
Ambrosia_trifida	-7434187.80972000000	4602516.62917000000
Ambrosia_trifida	-7436487.07778000000	4597837.89692000000
Ambrosia_trifida	-7433013.57169000000	4597638.26725000000
Ambrosia_trifida	-7434991.54043000000	4598081.43763000000
Ambrosia_trifida	-7433013.57169000000	4597638.26725000000
Ambrosia_trifida	-7433013.57169000000	4597638.26725000000
Ambrosia_trifida	-7432981.73122000000	4597638.26725000000
Ambrosia_trifida	-7433013.57169000000	4597638.26725000000
Ambrosia_trifida	-6786009.86409000000	5070771.30155000000
Ambrosia_trifida	-8482081.88070000000	3962070.94921000000
Ambrosia_trifida	-8720073.97470000000	4162492.61029000000
Ambrosia_trifida	-7017928.14675000000	4882324.67765000000
Ambrosia_trifida	-7012950.90199000000	4878391.78489000000
Ambrosia_trifida	-7012997.21540000000	4878375.51229000000
Ambrosia_trifida	-7012997.21540000000	4878375.51229000000
Ambrosia_trifida	-8799844.00690000000	4165050.60439000000
Ambrosia_trifida	-6887702.06159000000	4946880.15553000000
Ambrosia_trifida	-8892982.69566000000	4035901.88090000000
Ambrosia_trifida	-8816563.14954000000	4123714.37628000000
Ambrosia_trifida	-7008194.12837000000	4913674.40617000000
Ambrosia_trifida	-8131774.93217000000	3709323.02164000000
Ambrosia_trifida	-8888282.36651000000	3887710.25999000000
Ambrosia_trifida	-8972685.18746000000	3966451.71311000000
Ambrosia_trifida	-8854763.99762000000	4006742.09517000000
Ambrosia_trifida	-7476843.81530000000	4483490.20869000000
Ambrosia_trifida	-8452733.64883000000	3989849.79122000000
Ambrosia_trifida	-7468440.43921000000	4462228.75539000000
Ambrosia_trifida	-7475515.77814000000	4618181.97544000000
Ambrosia_trifida	-7475564.02128000000	4618171.02707000000
Ambrosia_trifida	-8509947.50438000000	3734393.08461000000
Ambrosia_trifida	-9104204.18877000000	3964584.44977000000
Ambrosia_trifida	-8869894.97609000000	4121633.09960000000
Ambrosia_trifida	-7473135.46161000000	4549376.56725000000
Ambrosia_trifida	-7056070.62063000000	4824915.62357000000
Ambrosia_trifida	-7056067.72604000000	4824407.83471000000
Ambrosia_trifida	-7057614.40112000000	4833289.29644000000
Ambrosia_trifida	-7046122.88514000000	4831949.08813000000
Ambrosia_trifida	-8961574.79229000000	4049558.78504000000
Ambrosia_trifida	-8851065.67850000000	4088115.91142000000
Ambrosia_trifida	-8486087.02619000000	3970658.36477000000
Ambrosia_trifida	-8488862.93647000000	3970144.06488000000
Ambrosia_trifida	-8747756.46742000000	4259068.15029000000
Ambrosia_trifida	-8930728.61092000000	3833935.04445000000
Ambrosia_trifida	-8759055.39679000000	4175513.06163000000
Ambrosia_trifida	-8803507.59096000000	4218337.58301000000
Ambrosia_trifida	-8714068.08970000000	4220964.78339000000
Ambrosia_trifida	-7031920.10469000000	4862952.07635000000
Ambrosia_trifida	-7031920.10469000000	4862952.07635000000
Ambrosia_trifida	-8821105.72362000000	3755117.18226000000
Ambrosia_trifida	-8934093.47346000000	4004545.09820000000
Ambrosia_trifida	-8565466.28895000000	4056031.16687000000
Ambrosia_trifida	-8744732.97335000000	4285161.95313000000
Ambrosia_trifida	-9005150.40861000000	3888422.82970000000
Ambrosia_trifida	-8689021.21621000000	4278504.84368000000
Ambrosia_trifida	-9255964.95034000000	3765417.40706000000
Ambrosia_trifida	-8752256.97348000000	3749360.77981000000
Ambrosia_trifida	-6774099.11523000000	5103803.23110000000
Ambrosia_trifida	-8034202.21640000000	3750931.31300000000
Ambrosia_trifida	-8457960.31064000000	3929471.99636000000
Ambrosia_trifida	-8444842.61489000000	4017150.54118000000
Ambrosia_trifida	-7249465.79104000000	4707754.04281000000
Ambrosia_trifida	-6731503.31708000000	5126565.91449000000
Ambrosia_trifida	-8892008.66666000000	3843045.17506000000
Ambrosia_trifida	-7193148.67898000000	4752821.13392000000
Ambrosia_trifida	-8784950.38468000000	3752644.72033000000
Ambrosia_trifida	-8849422.51714000000	4049404.16635000000
Ambrosia_trifida	-7588687.43083000000	4281192.39681000000
Ambrosia_trifida	-11889512.23530000000	5170148.73214000000
Ambrosia_trifida	-8094857.35162000000	3705353.82944000000
Ambrosia_trifida	-9031401.43087000000	3951922.19600000000
Ambrosia_trifida	-8924704.97245000000	4045611.95662000000
Ambrosia_trifida	-8558533.74972000000	3839493.54409000000
Ambrosia_trifida	-8096986.80382000000	3754243.45646000000
Ambrosia_trifida	-8990254.47072000000	4098801.30296000000
Ambrosia_trifida	-8906727.06979000000	4174509.43079000000
Ambrosia_trifida	-7163750.75669000000	4784010.41836000000
Ambrosia_trifida	-7014739.75762000000	4891682.79731000000
Ambrosia_trifida	-7013747.87866000000	4899160.07810000000
Ambrosia_trifida	-7013747.87866000000	4899160.07810000000
Ambrosia_trifida	-7014739.75762000000	4891682.79731000000
Ambrosia_trifida	-7026693.44288000000	4888391.38086000000
Ambrosia_trifida	-6868423.13794000000	4917316.64852000000
Ambrosia_trifida	-6868214.72757000000	4924151.87582000000
Ambrosia_trifida	-8978580.98161000000	3916052.59779000000
Ambrosia_trifida	-8692427.27839000000	4331003.66985000000
Ambrosia_trifida	-7486218.03634000000	4444665.00133000000
Ambrosia_trifida	-7815388.70032000000	4082458.77389000000
Ambrosia_trifida	-8791345.01290000000	4307464.95885000000
Ambrosia_trifida	-8687773.26266000000	3752838.15949000000
Ambrosia_trifida	-8814157.74657000000	3821591.08810000000
Ambrosia_trifida	-9058124.27105000000	3940960.92392000000
Ambrosia_trifida	-8557462.75201000000	3882623.82329000000
Ambrosia_trifida	-8163932.45857000000	3723072.78503000000
Ambrosia_trifida	-9032138.20011000000	4011536.45102000000
Ambrosia_trifida	-8677987.62412000000	4162209.09280000000
Ambrosia_trifida	-8852210.00578000000	4225378.33829000000
Ambrosia_trifida	-7709519.12932000000	4233191.01373000000
Ambrosia_trifida	-7553370.55767000000	4311142.05797000000
Ambrosia_trifida	-7272214.36134000000	4727627.80050000000
Ambrosia_trifida	-6622082.08610000000	5216568.56042000000
Ambrosia_trifida	-9058186.02227000000	4019672.52188000000
Ambrosia_trifida	-8967928.31736000000	4127024.27258000000
Ambrosia_trifida	-8662861.46996000000	4325219.28507000000
Ambrosia_trifida	-7521776.12521000000	4556705.17115000000
Ambrosia_trifida	-8687030.31830000000	3946836.59801000000
Ambrosia_trifida	-8454651.79609000000	3959999.27998000000
Ambrosia_trifida	-9291679.92589000000	3731893.62899000000
Ambrosia_trifida	-8991214.41272000000	3780932.67974000000
Ambrosia_trifida	-7490236.68992000000	4413860.32246000000
Ambrosia_trifida	-8127039.38553000000	3754813.01814000000
Ambrosia_trifida	-8127323.05520000000	3755370.13300000000
Ambrosia_trifida	-8783620.80374000000	3848948.15782000000
Ambrosia_trifida	-9352059.11035000000	3643786.97885000000
Ambrosia_trifida	-9178243.41836000000	3779328.06468000000
Ambrosia_trifida	-9044233.52723000000	3884960.62421000000
Ambrosia_trifida	-8525436.06100000000	4122534.58608000000
Ambrosia_trifida	-7274997.99052000000	4698922.91201000000
Ambrosia_trifida	-9301804.61722000000	3682453.11225000000
Ambrosia_trifida	-7806375.91688000000	4096375.65760000000
Ambrosia_trifida	-8615737.57069000000	4388262.20983000000
Ambrosia_trifida	-8650528.11119000000	4364439.62176000000
Ambrosia_trifida	-7523742.03317000000	4440505.55024000000
Ambrosia_trifida	-7081369.32331000000	4849860.44917000000
Ambrosia_trifida	-8909088.66799000000	4214107.36342000000
Ambrosia_trifida	-8646025.57892000000	4039573.34727000000
Ambrosia_trifida	-8634779.13810000000	4338319.79724000000
Ambrosia_trifida	-8615259.96360000000	4369096.79139000000
Ambrosia_trifida	-8605158.81492000000	4360177.02851000000
Ambrosia_trifida	-9027077.88066000000	3830335.44332000000
Ambrosia_trifida	-8424109.06407000000	3877272.44153000000
Ambrosia_trifida	-9005115.67354000000	3954409.74524000000
Ambrosia_trifida	-7521783.84411000000	4506444.80899000000
Ambrosia_trifida	-7512291.52386000000	4381887.72348000000
Ambrosia_trifida	-7549036.39396000000	4458555.38597000000
Ambrosia_trifida	-8587494.58917000000	4412611.08807000000
Ambrosia_trifida	-7021953.07194000000	4839841.65631000000
Ambrosia_trifida	-8937813.59848000000	3935976.23173000000
Ambrosia_trifida	-8937524.13964000000	3935652.30919000000
Ambrosia_trifida	-8937524.13964000000	3935652.30919000000
Ambrosia_trifida	-8940722.65983000000	3943628.50995000000
Ambrosia_trifida	-8936173.33172000000	3934140.53040000000
Ambrosia_trifida	-8556519.69510000000	4123733.95876000000
Ambrosia_trifida	-7492209.83435000000	4525897.38030000000
Ambrosia_trifida	-8726566.15055000000	3906829.53983000000
Ambrosia_trifida	-9037383.58025000000	4064503.54610000000
Ambrosia_trifida	-9182276.06244000000	3860376.49057000000
Ambrosia_trifida	-9128930.72781000000	3836000.12183000000
Ambrosia_trifida	-8648525.53844000000	4277813.37326000000
Ambrosia_trifida	-8678607.06604000000	4131591.15747000000
Ambrosia_trifida	-8943800.57217000000	4226287.52248000000
Ambrosia_trifida	-8722666.07862000000	4376817.79371000000
Ambrosia_trifida	-8601422.86615000000	4340395.38311000000
Ambrosia_trifida	-8710781.38105000000	4394769.40957000000
Ambrosia_trifida	-7589270.20797000000	4334527.23690000000
Ambrosia_trifida	-7011011.52775000000	4867959.05651000000
Ambrosia_trifida	-7010191.39437000000	4857441.70898000000
Ambrosia_trifida	-7011011.52775000000	4867959.05651000000
Ambrosia_trifida	-7011011.52775000000	4867959.05651000000
Ambrosia_trifida	-7010746.19048000000	4867970.56220000000
Ambrosia_trifida	-8722838.30663000000	3962681.07954000000
Ambrosia_trifida	-8676047.28502000000	4034473.57193000000
Ambrosia_trifida	-8834883.57849000000	4276426.41349000000
Ambrosia_trifida	-8755871.34954000000	4200945.46622000000
Ambrosia_trifida	-8642492.25134000000	4411517.78185000000
Ambrosia_trifida	-7495878.72515000000	5023038.92325000000
Ambrosia_trifida	-8664575.06630000000	4068724.60347000000
Ambrosia_trifida	-8682992.36748000000	4185572.95521000000
Ambrosia_trifida	-8512925.16747000000	4483264.56652000000
Ambrosia_trifida	-7535318.45707000000	4344132.50347000000
Ambrosia_trifida	-8559259.32654000000	4428460.93209000000
Ambrosia_trifida	-7517859.74709000000	4461746.93507000000
Ambrosia_trifida	-7479911.69307000000	4623543.66148000000
Ambrosia_trifida	-7490869.63992000000	4617392.65416000000
Ambrosia_trifida	-7479905.90389000000	4623543.66148000000
Ambrosia_trifida	-8407573.24536000000	3998258.13739000000
Ambrosia_trifida	-8407439.12943000000	3998347.18316000000
Ambrosia_trifida	-7518780.22620000000	4479163.42717000000
Ambrosia_trifida	-8587675.50094000000	4144946.46630000000
Ambrosia_trifida	-8542971.47758000000	4482833.73970000000
Ambrosia_trifida	-7033883.11806000000	4838345.80650000000
Ambrosia_trifida	-7036898.79675000000	4843933.45902000000
Ambrosia_trifida	-9442558.89934000000	3536777.94470000000
Ambrosia_trifida	-9260612.88743000000	3719465.89152000000
Ambrosia_trifida	-9308449.24140000000	3883611.57548000000
Ambrosia_trifida	-9092445.79174000000	4061193.63621000000
Ambrosia_trifida	-7266145.95323000000	4780647.36504000000
Ambrosia_trifida	-7062420.38274000000	4822664.05601000000
Ambrosia_trifida	-7062420.38274000000	4822664.05601000000
Ambrosia_trifida	-7062420.38274000000	4822664.05601000000
Ambrosia_trifida	-7062420.38274000000	4822664.05601000000
Ambrosia_trifida	-7062420.38274000000	4822664.05601000000
Ambrosia_trifida	-7062420.38274000000	4822664.05601000000
Ambrosia_trifida	-8575139.03855000000	4452936.21431000000
Ambrosia_trifida	-8810995.31225000000	3787111.52988000000
Ambrosia_trifida	-8619782.85448000000	4086262.47026000000
Ambrosia_trifida	-7056533.75478000000	4846271.82343000000
Ambrosia_trifida	-7056533.75478000000	4846271.82343000000
Ambrosia_trifida	-8699203.02742000000	3863045.44559000000
Ambrosia_trifida	-8598689.02389000000	3922158.00880000000
Ambrosia_trifida	-8599936.01257000000	4429329.15435000000
Ambrosia_trifida	-6853694.98969000000	5022798.78008000000
Ambrosia_trifida	-7357080.79886000000	4711210.24803000000
Ambrosia_trifida	-8637760.56416000000	3959689.50422000000
Ambrosia_trifida	-8660365.36989000000	4250183.75726000000
Ambrosia_trifida	-8614916.47244000000	4259349.25685000000
Ambrosia_trifida	-7876997.11999000000	4044747.44597000000
Ambrosia_trifida	-8579888.09326000000	4506954.43118000000
Ambrosia_trifida	-9312278.78186000000	3772080.76627000000
Ambrosia_trifida	-8605322.84160000000	4179437.66258000000
Ambrosia_trifida	-7085942.77300000000	4824645.32272000000
Ambrosia_trifida	-7079297.28045000000	4826440.67915000000
Ambrosia_trifida	-8420500.86314000000	4517685.56630000000
Ambrosia_trifida	-7553070.48534000000	4548982.57893000000
Ambrosia_trifida	-7325981.72695000000	4747798.93603000000
Ambrosia_trifida	-6669295.71762000000	5132895.71244000000
Ambrosia_trifida	-8656309.08667000000	4096473.01423000000
Ambrosia_trifida	-7841478.59050000000	4082329.05063000000
Ambrosia_trifida	-7531204.28208000000	4420503.62244000000
Ambrosia_trifida	-6971133.74813000000	4882442.33908000000
Ambrosia_trifida	-8546400.02106000000	4185793.39036000000
Ambrosia_trifida	-8445765.40967000000	3860144.44558000000
Ambrosia_trifida	-9337750.19498000000	3961193.26815000000
Ambrosia_trifida	-8477409.05015000000	4510186.79366000000
Ambrosia_trifida	-8722357.80496000000	3788332.34230000000
Ambrosia_trifida	-7446521.65092000000	4605020.87972000000
Ambrosia_trifida	-7446489.81045000000	4605064.75367000000
Ambrosia_trifida	-7446489.81045000000	4605064.75367000000
Ambrosia_trifida	-7446489.81045000000	4605064.75367000000
Ambrosia_trifida	-7446489.81045000000	4605064.75367000000
Ambrosia_trifida	-7456112.38718000000	4591533.52010000000
Ambrosia_trifida	-7446489.81045000000	4605064.75367000000
Ambrosia_trifida	-7446521.65092000000	4605020.87972000000
Ambrosia_trifida	-7446521.65092000000	4605020.87972000000
Ambrosia_trifida	-7446521.65092000000	4605020.87972000000
Ambrosia_trifida	-7446521.65092000000	4605020.87972000000
Ambrosia_trifida	-7446521.65092000000	4605020.87972000000
Ambrosia_trifida	-7446489.81045000000	4605064.75367000000
Ambrosia_trifida	-7446489.81045000000	4605064.75367000000
Ambrosia_trifida	-7446521.65092000000	4605020.87972000000
Ambrosia_trifida	-7446521.65092000000	4605020.87972000000
Ambrosia_trifida	-8636435.80753000000	4174505.74695000000
Ambrosia_trifida	-7293394.06471000000	4767199.35023000000
Ambrosia_trifida	-7116248.14876000000	4819497.78138000000
Ambrosia_trifida	-8635641.72544000000	3880031.33002000000
Ambrosia_trifida	-8590831.56717000000	4117216.48046000000
Ambrosia_trifida	-8704027.34143000000	4595142.42981000000
Ambrosia_trifida	-8705957.06704000000	4598137.33105000000
Ambrosia_trifida	-7610341.36428000000	4306913.61620000000
Ambrosia_trifida	-8531652.67204000000	4551242.52610000000
Ambrosia_trifida	-7254159.84858000000	4755227.63476000000
Ambrosia_trifida	-7246608.83228000000	4740209.41256000000
Ambrosia_trifida	-6906468.64310000000	4888510.83872000000
Ambrosia_trifida	-7568680.03576000000	4428358.33157000000
Ambrosia_trifida	-7142560.43982000000	4819125.80113000000
Ambrosia_trifida	-8406546.05242000000	3985941.93241000000
Ambrosia_trifida	-8941826.46288000000	4161693.67914000000
Ambrosia_trifida	-8738015.59851000000	4315337.59471000000
Ambrosia_trifida	-7616463.90119000000	4382115.69485000000
Ambrosia_trifida	-7552840.84799000000	4492011.87024000000
Ambrosia_trifida	-8507996.16585000000	4516583.57198000000
Ambrosia_trifida	-7073843.39345000000	4867498.81129000000
Ambrosia_trifida	-7072502.23416000000	4858065.94743000000
Ambrosia_trifida	-8653313.67010000000	4445188.53282000000
Ambrosia_trifida	-7034717.24195000000	5167384.13273000000
Ambrosia_trifida	-8582264.55035000000	4084802.72937000000
Ambrosia_trifida	-7728770.07195000000	4196014.37010000000
Ambrosia_trifida	-8580480.51902000000	4480455.54351000000
Ambrosia_trifida	-8464809.38924000000	4580107.76146000000
Ambrosia_trifida	-7401291.77733000000	4790116.05163000000
Ambrosia_trifida	-7561157.96535000000	4373582.06959000000
Ambrosia_trifida	-8537907.29867000000	4583655.46178000000
Ambrosia_trifida	-8579898.70675000000	4538077.42659000000
Ambrosia_trifida	-8475392.48689000000	4552473.98318000000
Ambrosia_trifida	-7309021.94753000000	4703853.87194000000
Ambrosia_trifida	-8628186.23057000000	4568882.78364000000
Ambrosia_trifida	-8496355.57857000000	4549750.64075000000
Ambrosia_trifida	-8678574.26070000000	3906727.20615000000
Ambrosia_trifida	-7639039.76105000000	4248504.97269000000
Ambrosia_trifida	-7549221.06870000000	4400611.44004000000
Ambrosia_trifida	-8624087.49338000000	4486252.92204000000
Ambrosia_trifida	-8627527.22927000000	4543120.11212000000
Ambrosia_trifida	-8450312.80806000000	4538911.32041000000
Ambrosia_trifida	-8401618.11215000000	4578385.05425000000
Ambrosia_trifida	-9463917.10233000000	3566858.78989000000
Ambrosia_trifida	-8598794.96582000000	3959637.26360000000
Ambrosia_trifida	-8508771.91554000000	4219157.55612000000
Ambrosia_trifida	-7527066.46795000000	4531983.24683000000
Ambrosia_trifida	-8540828.99972000000	4158005.75663000000
Ambrosia_trifida	-7467153.31223000000	4634227.10748000000
Ambrosia_trifida	-7467169.71490000000	4634276.76032000000
Ambrosia_trifida	-7377093.59716000000	4743076.27455000000
Ambrosia_trifida	-8643285.36856000000	3995820.32311000000
Ambrosia_trifida	-8542977.26675000000	4515967.91859000000
Ambrosia_trifida	-8726669.19790000000	3863561.60031000000
Ambrosia_trifida	-7589797.40900000000	4406867.46941000000
Ambrosia_trifida	-8622819.66366000000	4516347.00557000000
Ambrosia_trifida	-7498270.13761000000	4590508.86607000000
Ambrosia_trifida	-7498045.32458000000	4590547.83275000000
Ambrosia_trifida	-7498055.93807000000	4590564.81816000000
Ambrosia_trifida	-7498055.93807000000	4590564.81816000000
Ambrosia_trifida	-7498238.29714000000	4590547.83275000000
Ambrosia_trifida	-7498045.32458000000	4590547.83275000000
Ambrosia_trifida	-7507456.59635000000	4582215.98360000000
Ambrosia_trifida	-8620306.19606000000	4807653.44367000000
Ambrosia_trifida	-8826710.99758000000	4318945.69293000000
Ambrosia_trifida	-8767360.93579000000	4371076.70903000000
Ambrosia_trifida	-8363533.04760000000	4427423.32878000000
Ambrosia_trifida	-8499012.32829000000	4579487.87403000000
Ambrosia_trifida	-8203970.79137000000	4590587.79836000000
Ambrosia_trifida	-8434735.48406000000	4577243.83008000000
Ambrosia_trifida	-8270461.03087000000	4555838.04605000000
Ambrosia_trifida	-8718341.08111000000	4616920.01496000000
Ambrosia_trifida	-8434263.28021000000	4617014.98331000000
Ambrosia_trifida	-9228665.70112000000	3857832.84679000000
Ambrosia_trifida	-7647301.88122000000	4272007.21507000000
Ambrosia_trifida	-8554529.18314000000	3922075.83502000000
Ambrosia_trifida	-7743336.60568000000	4231406.52604000000
Ambrosia_trifida	-8499451.82330000000	4442466.98652000000
Ambrosia_trifida	-8419507.63337000000	4459957.02398000000
Ambrosia_trifida	-8431962.08242000000	4650722.40152000000
Ambrosia_trifida	-8677149.64078000000	4555172.22379000000
Ambrosia_trifida	-8629362.39832000000	4596200.77037000000
Ambrosia_trifida	-8675422.63285000000	4730398.87133000000
Ambrosia_trifida	-8678588.73365000000	4391243.58739000000
Ambrosia_trifida	-8620065.55928000000	4425910.01742000000
Ambrosia_trifida	-8321519.06173000000	4427819.88650000000
Ambrosia_trifida	-8450609.02094000000	4510076.28945000000
Ambrosia_trifida	-7403107.64912000000	4699414.83004000000
Ambrosia_trifida	-8704351.53534000000	4754028.78695000000
Ambrosia_trifida	-7498431.26970000000	4621720.40495000000
Ambrosia_trifida	-7498431.26970000000	4621753.23366000000
Ambrosia_trifida	-8748155.34171000000	4624516.96779000000
Ambrosia_trifida	-7046971.96440000000	4858478.87119000000
Ambrosia_trifida	-6997560.85786000000	4846639.33978000000
Ambrosia_trifida	-9339200.86621000000	3916216.82767000000
Ambrosia_trifida	-8728268.07205000000	4417587.51725000000
Ambrosia_trifida	-8776954.56664000000	4400066.17970000000
Ambrosia_trifida	-8553491.95563000000	4377656.95961000000
Ambrosia_trifida	-8666523.12430000000	4512720.26855000000
Ambrosia_trifida	-7512771.54310000000	4638655.36500000000
Ambrosia_trifida	-8590696.10043000000	3996275.31425000000
Ambrosia_trifida	-7093087.58205000000	4968069.86772000000
Ambrosia_trifida	-8634120.13680000000	4131101.37330000000
Ambrosia_trifida	-7137258.03629000000	4957982.95336000000
Ambrosia_trifida	-8416815.66615000000	4547820.68839000000
Ambrosia_trifida	-7455017.26790000000	4723754.81888000000
Ambrosia_trifida	-8294898.49701000000	3857968.42798000000
Ambrosia_trifida	-8384046.99565000000	4745101.00196000000
Ambrosia_trifida	-8782960.45164000000	4338394.54647000000
Ambrosia_trifida	-8667276.68215000000	4478301.28628000000
Ambrosia_trifida	-7576621.33906000000	4464032.77272000000
Ambrosia_trifida	-8713675.96946000000	4569134.61321000000
Ambrosia_trifida	-8579497.32383000000	4573056.74265000000
Ambrosia_trifida	-8831214.59120000000	4660253.35233000000
Ambrosia_trifida	-8438901.37570000000	4692717.97538000000
Ambrosia_trifida	-7278744.55278000000	5017930.50265000000
Ambrosia_trifida	-8598892.03102000000	3880359.98803000000
Ambrosia_trifida	-9270914.14865000000	3999445.70399000000
Ambrosia_trifida	-8517222.18397000000	4367128.42441000000
Ambrosia_trifida	-8007144.56883000000	4588772.13763000000
Ambrosia_trifida	-7499280.34896000000	4699919.99305000000
Ambrosia_trifida	-7332092.29957000000	4821709.89465000000
Ambrosia_trifida	-8748885.74285000000	4586024.69781000000
Ambrosia_trifida	-8301962.25759000000	4598877.57863000000
Ambrosia_trifida	-7654737.11398000000	4343938.02222000000
Ambrosia_trifida	-8505199.99345000000	4608669.07908000000
Ambrosia_trifida	-7874876.35155000000	4166356.71629000000
Ambrosia_trifida	-8660517.43227000000	4784294.27011000000
Ambrosia_trifida	-8588997.36298000000	4608226.16249000000
Ambrosia_trifida	-9202807.37801000000	4262398.61821000000
Ambrosia_trifida	-8664442.49415000000	4710398.29621000000
Ambrosia_trifida	-8721023.39970000000	4643141.64433000000
Ambrosia_trifida	-9434370.59116000000	3695675.43947000000
Ambrosia_trifida	-9068698.20250000000	4102621.26833000000
Ambrosia_trifida	-8475159.95495000000	4354653.56854000000
Ambrosia_trifida	-7633812.13438000000	4309136.07031000000
Ambrosia_trifida	-8674913.95718000000	4591336.91288000000
Ambrosia_trifida	-8611986.18411000000	4453898.88965000000
Ambrosia_trifida	-7879040.69940000000	4856330.79582000000
Ambrosia_trifida	-7169543.31052000000	4843462.79513000000
Ambrosia_trifida	-8099321.38586000000	5062662.50089000000
Ambrosia_trifida	-9219601.77995000000	4095952.45743000000
Ambrosia_trifida	-8013840.33073000000	4861853.84387000000
Ambrosia_trifida	-7971127.68771000000	4854101.46388000000
Ambrosia_trifida	-8338010.49675000000	4286731.88000000000
Ambrosia_trifida	-8022383.12950000000	4839084.62494000000
Ambrosia_trifida	-8516456.08290000000	4459257.25365000000
Ambrosia_trifida	-8729913.64556000000	4672393.86068000000
Ambrosia_trifida	-8650768.84446000000	4683273.83051000000
Ambrosia_trifida	-8622276.83185000000	4719521.10741000000
Ambrosia_trifida	-8532041.02932000000	4832559.73733000000
Ambrosia_trifida	-8321946.11001000000	4954401.25097000000
Ambrosia_trifida	-8340899.29598000000	5022271.73821000000
Ambrosia_trifida	-8321733.26127000000	5146427.20529000000
Ambrosia_trifida	-8547559.40020000000	4614535.23822000000
Ambrosia_trifida	-8467593.50086000000	4608380.14988000000
Ambrosia_trifida	-8472028.97516000000	4956036.52297000000
Ambrosia_trifida	-8467163.17205000000	4975140.65947000000
Ambrosia_trifida	-8320334.69264000000	4988094.88724000000
Ambrosia_trifida	-8442700.04055000000	5018760.63522000000
Ambrosia_trifida	-8338716.77632000000	4405192.93344000000
Ambrosia_trifida	-8546099.56278000000	4448041.10339000000
Ambrosia_trifida	-8513918.97616000000	4635345.20499000000
Ambrosia_trifida	-8457039.83152000000	4891023.69864000000
Ambrosia_trifida	-8459089.20011000000	4993093.27338000000
Ambrosia_trifida	-8458286.43426000000	5062188.68605000000
Ambrosia_trifida	-8976674.41272000000	4245406.78677000000
Ambrosia_trifida	-7700228.46539000000	4272967.53717000000
Ambrosia_trifida	-8702881.08442000000	4678975.10679000000
Ambrosia_trifida	-7450444.78308000000	4694257.28144000000
Ambrosia_trifida	-7435682.38220000000	4800947.05951000000
Ambrosia_trifida	-8469237.24113000000	4941942.48431000000
Ambrosia_trifida	-11363903.22360000000	4058500.45114000000
Ambrosia_trifida	-8793759.58207000000	4589148.89721000000
Ambrosia_trifida	-8796091.65546000000	4584965.86676000000
Ambrosia_trifida	-8341837.14263000000	4536505.78478000000
Ambrosia_trifida	-8742539.45425000000	4722563.27370000000
Ambrosia_trifida	-8749142.39635000000	4751722.59820000000
Ambrosia_trifida	-7468198.74108000000	4759033.51448000000
Ambrosia_trifida	-8737649.33659000000	5332939.04710000000
Ambrosia_trifida	-9287270.50288000000	4089915.85799000000
Ambrosia_trifida	-9189512.53346000000	4185018.21629000000
Ambrosia_trifida	-7830683.31952000000	4166268.22240000000
Ambrosia_trifida	-8331258.86929000000	4781441.10781000000
Ambrosia_trifida	-8613454.70530000000	5356741.15921000000
Ambrosia_trifida	-8056559.53483000000	4892647.82040000000
Ambrosia_trifida	-8918422.75074000000	4529656.16730000000
Ambrosia_trifida	-7864995.19159000000	4629262.44929000000
Ambrosia_trifida	-8287002.05984000000	4435994.87082000000
Ambrosia_trifida	-8553182.62061000000	5357127.39523000000
Ambrosia_trifida	-8814986.56372000000	4678526.52581000000
Ambrosia_trifida	-8829116.97946000000	4552307.45721000000
Ambrosia_trifida	-8709816.51825000000	4699218.06707000000
Ambrosia_trifida	-8707580.93114000000	4704796.75762000000
Ambrosia_trifida	-8676160.17397000000	4633725.19701000000
Ambrosia_trifida	-8033474.70985000000	4927834.39214000000
Ambrosia_trifida	-8955856.53289000000	4605120.59285000000
Ambrosia_trifida	-8955204.28563000000	4592777.57614000000
Ambrosia_trifida	-8955856.53289000000	4605120.59285000000
Ambrosia_trifida	-8470761.14544000000	4641263.40752000000
Ambrosia_trifida	-8391021.98885000000	4611787.45712000000
Ambrosia_trifida	-7489056.66271000000	4766638.82657000000
Ambrosia_trifida	-7228473.27105000000	4762900.95029000000
Ambrosia_trifida	-9189031.45286000000	4334039.36918000000
Ambrosia_trifida	-8940418.72805000000	4603126.06719000000
Ambrosia_trifida	-7620170.90408000000	4343549.14900000000
Ambrosia_trifida	-8756176.24618000000	4702596.29183000000
Ambrosia_trifida	-8614110.81200000000	4662453.80394000000
Ambrosia_trifida	-8188943.05322000000	4146481.47646000000
Ambrosia_trifida	-8942340.73475000000	4330223.64179000000
Ambrosia_trifida	-8341854.51016000000	4351346.18124000000
Ambrosia_trifida	-8576170.47688000000	4837569.90672000000
Ambrosia_trifida	-8477547.99039000000	4817964.60130000000
Ambrosia_trifida	-9370520.31278000000	4008197.72715000000
Ambrosia_trifida	-7875475.53135000000	4203740.31689000000
Ambrosia_trifida	-8431119.75719000000	4354218.52800000000
Ambrosia_trifida	-7880256.42654000000	4591467.98495000000
Ambrosia_trifida	-8636794.73649000000	4757274.91457000000
Ambrosia_trifida	-7791839.29390000000	4890256.57229000000
Ambrosia_trifida	-8260219.97708000000	4212060.07391000000
Ambrosia_trifida	-7579598.42323000000	4510374.06126000000
Ambrosia_trifida	-8850331.41790000000	4716319.57666000000
Ambrosia_trifida	-7396848.58412000000	4807083.69505000000
Ambrosia_trifida	-9323736.91359000000	4052638.56966000000
Ambrosia_trifida	-9323758.71948000000	4052638.56966000000
Ambrosia_trifida	-9323739.42223000000	4052638.56966000000
Ambrosia_trifida	-8265166.24975000000	4526719.43659000000
Ambrosia_trifida	-8512291.73504000000	4684061.49339000000
Ambrosia_trifida	-8550304.43487000000	4671451.95886000000
Ambrosia_trifida	-8473774.02602000000	4779612.15772000000
Ambrosia_trifida	-8401120.72537000000	4853684.60174000000
Ambrosia_trifida	-8354965.06592000000	4895296.46666000000
Ambrosia_trifida	-7999692.93341000000	4964136.33050000000
Ambrosia_trifida	-8703062.47863000000	4428530.86302000000
Ambrosia_trifida	-8287997.79825000000	4628527.62765000000
Ambrosia_trifida	-8478071.91089000000	4265125.87932000000
Ambrosia_trifida	-7660860.13332000000	4307528.89979000000
Ambrosia_trifida	-8751305.61876000000	4524910.10778000000
Ambrosia_trifida	-9387466.68061000000	3961580.96521000000
Ambrosia_trifida	-8840474.37951000000	4688713.55398000000
Ambrosia_trifida	-8378748.93400000000	4639125.96351000000
Ambrosia_trifida	-8160558.71929000000	4651673.44548000000
Ambrosia_trifida	-6971448.29340000000	4987918.44340000000
Ambrosia_trifida	-9142536.25819000000	4250743.20920000000
Ambrosia_trifida	-8984802.41696000000	4610104.48284000000
Ambrosia_trifida	-8633412.31345000000	4630814.12970000000
Ambrosia_trifida	-7913711.59692000000	4615664.90046000000
Ambrosia_trifida	-9562558.01771000000	3532271.78427000000
Ambrosia_trifida	-8719465.14627000000	4570136.63457000000
Ambrosia_trifida	-8724289.46029000000	4560110.24259000000
Ambrosia_trifida	-8726485.87397000000	4572020.06271000000
Ambrosia_trifida	-8700959.07772000000	4535665.27888000000
Ambrosia_trifida	-8861299.97824000000	4668651.57515000000
Ambrosia_trifida	-8466398.03584000000	4675464.22835000000
Ambrosia_trifida	-8675208.43330000000	4876935.31505000000
Ambrosia_trifida	-8532350.26785000000	4861310.03073000000
Ambrosia_trifida	-8417886.66386000000	4719133.73893000000
Ambrosia_trifida	-8638327.90348000000	4844102.08103000000
Ambrosia_trifida	-8514268.73893000000	4171410.04426000000
Ambrosia_trifida	-7739362.33580000000	4281613.93869000000
Ambrosia_trifida	-8951215.92875000000	4510732.82629000000
Ambrosia_trifida	-8799028.69783000000	4705698.91956000000
Ambrosia_trifida	-8696873.84862000000	4838892.94495000000
Ambrosia_trifida	-8068412.39193000000	4839505.33746000000
Ambrosia_trifida	-7955585.19525000000	4117191.79940000000
Ambrosia_trifida	-7833043.37394000000	4195528.12174000000
Ambrosia_trifida	-6870841.08412000000	5076452.99939000000
Ambrosia_trifida	-8960680.84690000000	4603126.06719000000
Ambrosia_trifida	-8735608.26582000000	4533563.29621000000
Ambrosia_trifida	-8405387.83111000000	4647434.36311000000
Ambrosia_trifida	-8414307.98772000000	4684941.64069000000
Ambrosia_trifida	-8773149.14774000000	4786224.27174000000
Ambrosia_trifida	-8465553.78089000000	4724990.16100000000
Ambrosia_trifida	-8352293.36082000000	4764224.76917000000
Ambrosia_trifida	-9036923.34069000000	4150887.48083000000
Ambrosia_trifida	-7910982.48248000000	4191495.24218000000
Ambrosia_trifida	-8290834.49489000000	4401987.84579000000
Ambrosia_trifida	-8930770.10002000000	4519867.88469000000
Ambrosia_trifida	-8762883.97239000000	4556095.84525000000
Ambrosia_trifida	-8750340.75595000000	4542028.20857000000
Ambrosia_trifida	-8359927.35531000000	4515984.26939000000
Ambrosia_trifida	-8373527.09651000000	4320496.84505000000
Ambrosia_trifida	-8583544.53734000000	4693312.54901000000
Ambrosia_trifida	-8796545.14098000000	4746482.58974000000
Ambrosia_trifida	-7057252.57757000000	5091333.20797000000
Ambrosia_trifida	-7051959.34023000000	5130257.59704000000
Ambrosia_trifida	-8859265.08259000000	4342631.62780000000
Ambrosia_trifida	-8714640.83226000000	4496629.97272000000
Ambrosia_trifida	-7545899.62499000000	4598948.03641000000
Ambrosia_trifida	-8568875.14923000000	4647343.17194000000
Ambrosia_trifida	-8405931.04887000000	4807085.53428000000
Ambrosia_trifida	-8254129.18415000000	4998466.60103000000
Ambrosia_trifida	-9075836.25752000000	4183823.88995000000
Ambrosia_trifida	-7571355.60031000000	4537793.93972000000
Ambrosia_trifida	-8995290.47563000000	4640500.46336000000
Ambrosia_trifida	-8468899.34617000000	4306391.25784000000
Ambrosia_trifida	-8512076.57064000000	4659019.87017000000
Ambrosia_trifida	-8489094.50355000000	4847035.69479000000
Ambrosia_trifida	-8384579.59992000000	4291979.28624000000
Ambrosia_trifida	-8920928.49944000000	4593944.12105000000
Ambrosia_trifida	-7772029.69570000000	4239275.37405000000
Ambrosia_trifida	-9025971.18302000000	4685721.22702000000
Ambrosia_trifida	-8548003.23709000000	4707800.91268000000
Ambrosia_trifida	-7926753.16499000000	4849628.70710000000
Ambrosia_trifida	-7861017.06225000000	4857163.18265000000
Ambrosia_trifida	-7861017.06225000000	4857163.18265000000
Ambrosia_trifida	-8969355.92836000000	4659692.74161000000
Ambrosia_trifida	-8851850.11195000000	4747340.61321000000
Ambrosia_trifida	-8433110.26916000000	4799926.69429000000
Ambrosia_trifida	-8381261.43674000000	4780152.33274000000
Ambrosia_trifida	-8364836.09482000000	4808258.66194000000
Ambrosia_trifida	-8891548.04116000000	4288775.04621000000
Ambrosia_trifida	-7660753.03355000000	4387605.37952000000
Ambrosia_trifida	-7826746.48632000000	4592515.87666000000
Ambrosia_trifida	-8891178.88465000000	4719344.05265000000
Ambrosia_trifida	-8544510.43375000000	4793794.93086000000
Ambrosia_trifida	-8111466.11396000000	4836787.36029000000
Ambrosia_trifida	-8154877.60711000000	5298405.43591000000
Ambrosia_trifida	-8254833.53400000000	4432491.30296000000
Ambrosia_trifida	-8938489.00244000000	4656783.09657000000
Ambrosia_trifida	-8883432.96607000000	4686558.28705000000
Ambrosia_trifida	-7371831.62138000000	4809590.94919000000
Ambrosia_trifida	-8344630.42044000000	4592189.23845000000
Ambrosia_trifida	-8430845.73616000000	4850542.16399000000
Ambrosia_trifida	-7387120.45140000000	4990198.55061000000
Ambrosia_trifida	-8790879.46660000000	5079973.22047000000
Ambrosia_trifida	-7942752.51998000000	4590686.31265000000
Ambrosia_trifida	-8199468.74153000000	5232787.90709000000
Ambrosia_trifida	-8151885.56756000000	4835637.16447000000
Ambrosia_trifida	-8286627.69307000000	4976199.46752000000
Ambrosia_trifida	-8755320.41288000000	4824375.49319000000
Ambrosia_trifida	-9238446.51535000000	4190811.65658000000
Ambrosia_trifida	-8246315.14626000000	4488017.85841000000
Ambrosia_trifida	-8810162.24971000000	4720828.03053000000
Ambrosia_trifida	-8738328.79298000000	4849893.14239000000
Ambrosia_trifida	-8312910.07338000000	4343668.83602000000
Ambrosia_trifida	-8348309.44231000000	4624125.45352000000
Ambrosia_trifida	-7192750.67308000000	4791573.64664000000
Ambrosia_trifida	-8218108.92601000000	4482727.39776000000
Ambrosia_trifida	-8509720.85811000000	4720863.33603000000
Ambrosia_trifida	-8050492.95996000000	5040996.43010000000
Ambrosia_trifida	-8787597.00335000000	4548831.24807000000
Ambrosia_trifida	-8315894.39403000000	5272300.66127000000
Ambrosia_trifida	-8614507.37062000000	4824298.16249000000
Ambrosia_trifida	-8686456.22494000000	4438811.15246000000
Ambrosia_trifida	-9001057.94303000000	4537913.39397000000
Ambrosia_trifida	-9021570.44378000000	4650634.22529000000
Ambrosia_trifida	-8943809.25594000000	4622429.17309000000
Ambrosia_trifida	-9336927.64944000000	4095775.03881000000
Ambrosia_trifida	-9187213.26540000000	4381412.14610000000
Ambrosia_trifida	-7717087.51314000000	4753011.46068000000
Ambrosia_trifida	-11288894.78940000000	3986270.20787000000
Ambrosia_trifida	-11288894.78940000000	3986270.20787000000
Ambrosia_trifida	-11288894.78940000000	3986270.20787000000
Ambrosia_trifida	-9327935.61056000000	4053046.04492000000
Ambrosia_trifida	-8976687.92079000000	4370615.81382000000
Ambrosia_trifida	-8141454.43580000000	4602674.52945000000
Ambrosia_trifida	-9068401.98962000000	4703209.28044000000
Ambrosia_trifida	-8796771.88374000000	4642003.94989000000
Ambrosia_trifida	-8776542.57022000000	4614164.08851000000
Ambrosia_trifida	-8771567.73761000000	4609107.98201000000
Ambrosia_trifida	-8704387.23526000000	4797932.69215000000
Ambrosia_trifida	-8663977.23731000000	4813205.04131000000
Ambrosia_trifida	-8602775.60380000000	4932311.57122000000
Ambrosia_trifida	-9257023.98375000000	4315435.64085000000
Ambrosia_trifida	-8261946.50258000000	4607735.27450000000
Ambrosia_trifida	-8743078.23364000000	4790418.27216000000
Ambrosia_trifida	-8207525.34593000000	4813473.69574000000
Ambrosia_trifida	-7976349.04276000000	4989191.12682000000
Ambrosia_trifida	-8979013.24015000000	4385536.74509000000
Ambrosia_trifida	-8975153.78894000000	4388615.48648000000
Ambrosia_trifida	-7604086.64116000000	4443822.02015000000
Ambrosia_trifida	-7863070.29030000000	4653846.69103000000
Ambrosia_trifida	-8866124.29225000000	4674578.23300000000
Ambrosia_trifida	-8307096.29256000000	4656740.23458000000
Ambrosia_trifida	-8428632.34089000000	4740916.97855000000
Ambrosia_trifida	-8383967.39447000000	4711106.14446000000
Ambrosia_trifida	-8909527.68056000000	4332627.35387000000
Ambrosia_trifida	-8769213.47237000000	4669677.24886000000
Ambrosia_trifida	-7085044.48573000000	5025357.61202000000
Ambrosia_trifida	-7799287.06987000000	4224697.40767000000
Ambrosia_trifida	-8139237.18108000000	4577485.26166000000
Ambrosia_trifida	-8876585.33476000000	4657300.58729000000
Ambrosia_trifida	-8323048.36927000000	4808892.27535000000
Ambrosia_trifida	-8552877.72397000000	5094258.89705000000
Ambrosia_trifida	-8879534.92035000000	4255422.40833000000
Ambrosia_trifida	-8339419.67888000000	4484745.00602000000
Ambrosia_trifida	-8232508.53848000000	4510741.91640000000
Ambrosia_trifida	-8992891.82670000000	4621654.24966000000
Ambrosia_trifida	-8424238.35569000000	4148145.64704000000
Ambrosia_trifida	-7973451.55977000000	4148151.98091000000
Ambrosia_trifida	-8885421.54831000000	4740413.78907000000
Ambrosia_trifida	-8891087.22268000000	4751530.67263000000
Ambrosia_trifida	-7836892.59760000000	4249361.31093000000
Ambrosia_trifida	-9102721.19465000000	4492620.77360000000
Ambrosia_trifida	-7636154.82127000000	4468370.23693000000
Ambrosia_trifida	-9159539.07050000000	4642911.04544000000
Ambrosia_trifida	-8578082.83496000000	4723732.66436000000
Ambrosia_trifida	-7743687.81574000000	4316481.25602000000
Ambrosia_trifida	-8903975.86000000000	4558820.35476000000
Ambrosia_trifida	-8616203.02051000000	4875897.75345000000
Ambrosia_trifida	-8749375.89315000000	4516840.92031000000
Ambrosia_trifida	-8749375.89315000000	4520876.60115000000
Ambrosia_trifida	-8749375.89315000000	4520876.60115000000
Ambrosia_trifida	-8748893.46175000000	4520372.25991000000
Ambrosia_trifida	-8244169.87031000000	4547760.48859000000
Ambrosia_trifida	-9143635.62287000000	4619504.61436000000
Ambrosia_trifida	-7906751.55909000000	4703707.28090000000
Ambrosia_trifida	-8607759.12018000000	4783881.79703000000
Ambrosia_trifida	-8163873.50545000000	4989802.93185000000
Ambrosia_trifida	-9366176.01801000000	4144574.10464000000
Ambrosia_trifida	-7769353.16629000000	4265168.37515000000
Ambrosia_trifida	-8535328.79932000000	5126398.96845000000
Ambrosia_trifida	-8930741.15414000000	4690335.52125000000
Ambrosia_trifida	-8861565.31551000000	4629454.83795000000
Ambrosia_trifida	-8849406.69339000000	4837201.28749000000
Ambrosia_trifida	-7168902.25568000000	4807728.94176000000
Ambrosia_trifida	-7115510.99358000000	4846282.98392000000
Ambrosia_trifida	-7832888.41697000000	4229659.94847000000
Ambrosia_trifida	-8703062.47863000000	4450279.07748000000
Ambrosia_trifida	-9068796.03959000000	4642895.37436000000
Ambrosia_trifida	-8625272.92382000000	5071658.43321000000
Ambrosia_trifida	-8780251.50283000000	4635964.74951000000
Ambrosia_trifida	-8569239.86737000000	4931753.81271000000
Ambrosia_trifida	-8512855.21492000000	5179602.36929000000
Ambrosia_trifida	-8868874.15124000000	4525448.41630000000
Ambrosia_trifida	-8512455.76172000000	4765258.30400000000
Ambrosia_trifida	-7698502.71178000000	4311153.45248000000
Ambrosia_trifida	-7697390.80389000000	4343880.76028000000
Ambrosia_trifida	-8499083.72814000000	4886590.63316000000
Ambrosia_trifida	-9180109.94545000000	4409846.89063000000
Ambrosia_trifida	-7631221.47776000000	4427684.50370000000
Ambrosia_trifida	-7235855.43635000000	4790612.27213000000
Ambrosia_trifida	-8863148.65537000000	4554581.84848000000
Ambrosia_trifida	-8869455.96351000000	4591767.68351000000
Ambrosia_trifida	-8319870.11120000000	4627587.37430000000
Ambrosia_trifida	-8009306.44043000000	4704105.95006000000
Ambrosia_trifida	-9027947.22204000000	4718100.51723000000
Ambrosia_trifida	-8369701.89793000000	4857601.13575000000
Ambrosia_trifida	-8252448.39315000000	4892668.44871000000
Ambrosia_trifida	-8284366.05466000000	4828219.61285000000
Ambrosia_trifida	-8490185.37743000000	5132230.78311000000
Ambrosia_trifida	-9237765.32221000000	4425400.40894000000
Ambrosia_trifida	-9140029.54463000000	4408997.49636000000
Ambrosia_trifida	-9140637.40820000000	4409949.22112000000
Ambrosia_trifida	-8311134.24339000000	4685627.77595000000
Ambrosia_trifida	-8316193.98393000000	4380572.96203000000
Ambrosia_trifida	-9102458.75196000000	4533781.49591000000
Ambrosia_trifida	-8213202.59866000000	4553695.49381000000
Ambrosia_trifida	-8200129.67255000000	4508180.09161000000
Ambrosia_trifida	-9048875.09623000000	4614012.91442000000
Ambrosia_trifida	-8111483.86743000000	4890425.48199000000
Ambrosia_trifida	-8243538.85003000000	4586702.10858000000
Ambrosia_trifida	-9166089.13812000000	4293223.32974000000
Ambrosia_trifida	-8786040.67965000000	4498653.50411000000
Ambrosia_trifida	-8879632.37149000000	4582150.16406000000
Ambrosia_trifida	-7958732.57771000000	4633007.22639000000
Ambrosia_trifida	-8222599.97641000000	4778195.36027000000
Ambrosia_trifida	-8284209.74688000000	4862141.18397000000
Ambrosia_trifida	-7243509.69296000000	5134185.20639000000
Ambrosia_trifida	-7673436.73401000000	4437885.45464000000
Ambrosia_trifida	-9049576.55148000000	4546788.07840000000
Ambrosia_trifida	-8933052.96541000000	4571452.38049000000
Ambrosia_trifida	-8645334.73716000000	4965477.74293000000
Ambrosia_trifida	-8676394.63563000000	4906521.58170000000
Ambrosia_trifida	-9189932.24878000000	4603854.13324000000
Ambrosia_trifida	-9193881.81817000000	4596580.43716000000
Ambrosia_trifida	-9192238.27087000000	4603126.06719000000
Ambrosia_trifida	-9190115.57271000000	4595781.44646000000
Ambrosia_trifida	-9190781.32804000000	4603824.21417000000
Ambrosia_trifida	-9189932.24878000000	4603854.13324000000
Ambrosia_trifida	-9150842.76206000000	4528651.55744000000
Ambrosia_trifida	-9000638.71014000000	4580778.62122000000
Ambrosia_trifida	-8013319.69077000000	4540651.45866000000
Ambrosia_trifida	-8618134.28989000000	4904759.47479000000
Ambrosia_trifida	-8155306.97106000000	4287148.78077000000
Ambrosia_trifida	-8906470.99520000000	4606838.63189000000
Ambrosia_trifida	-8112826.95645000000	4577464.84238000000
Ambrosia_trifida	-8532511.39993000000	4894606.43844000000
Ambrosia_trifida	-8538149.09329000000	5065868.10240000000
Ambrosia_trifida	-8227345.07519000000	4462575.76935000000
Ambrosia_trifida	-8157097.75642000000	4627664.90519000000
Ambrosia_trifida	-8572356.37423000000	4755526.58121000000
Ambrosia_trifida	-8724930.12919000000	5030687.42594000000
Ambrosia_trifida	-7836080.18312000000	4267986.37267000000
Ambrosia_trifida	-8846827.03620000000	4366010.55676000000
Ambrosia_trifida	-8819066.96851000000	4374074.24919000000
Ambrosia_trifida	-9146011.69401000000	4550090.23444000000
Ambrosia_trifida	-9051242.86954000000	4583050.77969000000
Ambrosia_trifida	-9044623.91072000000	4584150.49148000000
Ambrosia_trifida	-7551300.92696000000	4628573.64320000000
Ambrosia_trifida	-7958355.79879000000	4716011.02903000000
Ambrosia_trifida	-7334846.50044000000	4854847.38431000000
Ambrosia_trifida	-8566080.90656000000	4997304.42719000000
Ambrosia_trifida	-8371812.53531000000	4247565.05152000000
Ambrosia_trifida	-9147934.66557000000	4390027.00057000000
Ambrosia_trifida	-8156576.73051000000	4601427.49163000000
Ambrosia_trifida	-8184905.58482000000	4560812.93794000000
Ambrosia_trifida	-8132850.75419000000	4682679.67126000000
Ambrosia_trifida	-7971857.22047000000	4610165.76312000000
Ambrosia_trifida	-8249957.50334000000	4817740.87934000000
Ambrosia_trifida	-8964400.77895000000	5225463.78416000000
Ambrosia_trifida	-8716875.45451000000	4455081.20857000000
Ambrosia_trifida	-8563771.98987000000	5160968.69801000000
Ambrosia_trifida	-8129049.19475000000	4245527.88782000000
Ambrosia_trifida	-8302855.23811000000	4714104.86726000000
Ambrosia_trifida	-8277594.64751000000	4789819.25240000000
Ambrosia_trifida	-8288469.61616000000	4539948.95314000000
Ambrosia_trifida	-8924712.20892000000	4651142.46184000000
Ambrosia_trifida	-8252459.00664000000	4924061.99340000000
Ambrosia_trifida	-8294290.63345000000	4477016.61745000000
Ambrosia_trifida	-8825859.98859000000	4602287.90202000000
Ambrosia_trifida	-9144069.42519000000	4645676.14744000000
Ambrosia_trifida	-9109391.29120000000	4728459.24135000000
Ambrosia_trifida	-8126445.99491000000	4762014.32608000000
Ambrosia_trifida	-7455150.41897000000	4746060.91331000000
Ambrosia_trifida	-8625873.45443000000	5001638.87896000000
Ambrosia_trifida	-8627642.04795000000	5001654.25960000000
Ambrosia_trifida	-8625873.45443000000	5001638.87896000000
Ambrosia_trifida	-8520356.05835000000	4997036.56140000000
Ambrosia_trifida	-8268402.39959000000	4504776.85159000000
Ambrosia_trifida	-8275727.63799000000	4689681.57840000000
Ambrosia_trifida	-9186789.69063000000	4716397.39832000000
Ambrosia_trifida	-8309037.98246000000	4754236.25402000000
Ambrosia_trifida	-8264478.30257000000	4757567.91685000000
Ambrosia_trifida	-8325565.69633000000	4864170.61727000000
Ambrosia_trifida	-9127602.11173000000	4434653.77674000000
Ambrosia_trifida	-7700040.31715000000	4462321.45661000000
Ambrosia_trifida	-9204221.86688000000	4709874.45879000000
Ambrosia_trifida	-9200468.55058000000	4709560.11734000000
Ambrosia_trifida	-8993486.18219000000	4737479.55775000000
Ambrosia_trifida	-7861118.37285000000	4750801.38314000000
Ambrosia_trifida	-9019044.43296000000	5180408.36607000000
Ambrosia_trifida	-9103834.64632000000	4367295.19102000000
Ambrosia_trifida	-9151290.45840000000	4423365.52595000000
Ambrosia_trifida	-9103913.28264000000	4572822.37572000000
Ambrosia_trifida	-7902798.51619000000	4559042.32592000000
Ambrosia_trifida	-8302799.27607000000	4737465.47034000000
Ambrosia_trifida	-9411813.06370000000	5510978.53344000000
Ambrosia_trifida	-9047916.02260000000	4511827.60031000000
Ambrosia_trifida	-8125207.11107000000	4528248.20442000000
Ambrosia_trifida	-8176325.92829000000	4511710.95993000000
Ambrosia_trifida	-8201306.80517000000	4842829.41321000000
Ambrosia_trifida	-8177040.50568000000	4175754.79587000000
Ambrosia_trifida	-8429187.13700000000	4318918.99277000000
Ambrosia_trifida	-7707754.39525000000	4372271.08846000000
Ambrosia_trifida	-8896891.83730000000	4490047.53563000000
Ambrosia_trifida	-7866112.50271000000	4542264.96728000000
Ambrosia_trifida	-8983893.51620000000	4694081.53856000000
Ambrosia_trifida	-8379212.06815000000	4674325.66310000000
Ambrosia_trifida	-8270862.79974000000	4723093.09312000000
Ambrosia_trifida	-6919694.01754000000	4988267.18984000000
Ambrosia_trifida	-8152716.70038000000	5223187.04137000000
Ambrosia_trifida	-8229922.70616000000	4170382.57123000000
Ambrosia_trifida	-9050227.83388000000	5163777.71728000000
Ambrosia_trifida	-9169868.40923000000	4628257.78967000000
Ambrosia_trifida	-7525638.47100000000	4619703.03879000000
Ambrosia_trifida	-8161255.35024000000	4859083.22756000000
Ambrosia_trifida	-7914027.58949000000	4585442.70981000000
Ambrosia_trifida	-9195779.31736000000	4609317.25869000000
Ambrosia_trifida	-8593882.07741000000	4964463.83139000000
Ambrosia_trifida	-7408873.66923000000	4747564.99214000000
Ambrosia_trifida	-7791762.58731000000	4835097.64961000000
Ambrosia_trifida	-6979137.67102000000	4886713.94943000000
Ambrosia_trifida	-7601662.32688000000	4972331.63982000000
Ambrosia_trifida	-8278219.87861000000	5046901.77037000000
Ambrosia_trifida	-8610266.79860000000	5098898.61973000000
Ambrosia_trifida	-9375206.55492000000	5397604.39413000000
Ambrosia_trifida	-9137820.00881000000	4501303.51193000000
Ambrosia_trifida	-9101550.81607000000	4481436.27421000000
Ambrosia_trifida	-8131585.33663000000	4479723.15811000000
Ambrosia_trifida	-8014601.99343000000	4477294.08118000000
Ambrosia_trifida	-9239314.40944000000	4612356.06392000000
Ambrosia_trifida	-9110556.84547000000	4639240.68078000000
Ambrosia_trifida	-8984060.43747000000	4727855.09273000000
Ambrosia_trifida	-8565000.64616000000	4890646.73909000000
Ambrosia_trifida	-8543049.14903000000	4964137.84063000000
Ambrosia_trifida	-8559106.87822000000	5034287.31460000000
Ambrosia_trifida	-8346331.47356000000	4115274.09803000000
Ambrosia_trifida	-8119363.90194000000	4613324.42437000000
Ambrosia_trifida	-7905036.99789000000	4762000.87522000000
Ambrosia_trifida	-8651529.15635000000	4934050.74951000000
Ambrosia_trifida	-8899843.35261000000	5114495.38886000000
Ambrosia_trifida	-9338263.50199000000	5346868.35051000000
Ambrosia_trifida	-9338263.50199000000	5346868.35051000000
Ambrosia_trifida	-8014868.29556000000	4172795.75426000000
Ambrosia_trifida	-8118937.43258000000	4504796.66347000000
Ambrosia_trifida	-8126883.65668000000	4712341.53495000000
Ambrosia_trifida	-8297175.57323000000	4892541.81275000000
Ambrosia_trifida	-8761761.83695000000	5117549.38006000000
Ambrosia_trifida	-9150134.55276000000	4564589.22395000000
Ambrosia_trifida	-7084289.96302000000	4899319.39559000000
Ambrosia_trifida	-9337931.01027000000	5511595.11361000000
Ambrosia_trifida	-8036723.40290000000	4151925.64783000000
Ambrosia_trifida	-8298338.23290000000	4357702.01055000000
Ambrosia_trifida	-8140914.11263000000	4958044.55446000000
Ambrosia_trifida	-9195270.83466000000	4462841.66050000000
Ambrosia_trifida	-9183728.18096000000	4467299.25481000000
Ambrosia_trifida	-9056661.53904000000	4479660.17902000000
Ambrosia_trifida	-8728597.09027000000	4488497.72469000000
Ambrosia_trifida	-8124602.14209000000	4739325.33904000000
Ambrosia_trifida	-8089561.21970000000	4924856.82719000000
Ambrosia_trifida	-8982835.06171000000	5181491.61330000000
Ambrosia_trifida	-9067661.93985000000	4673516.94308000000
Ambrosia_trifida	-8093895.38340000000	4677008.08142000000
Ambrosia_trifida	-7852509.86692000000	4610007.62904000000
Ambrosia_trifida	-9194911.90570000000	4425618.24764000000
Ambrosia_trifida	-9402992.28796000000	5438402.64802000000
Ambrosia_trifida	-7803120.46979000000	4283167.89941000000
Ambrosia_trifida	-8149179.12740000000	4512070.67105000000
Ambrosia_trifida	-8239755.62298000000	4729221.23195000000
Ambrosia_trifida	-8534398.18914000000	4931598.18532000000
Ambrosia_trifida	-7728951.46616000000	4910599.45747000000
Ambrosia_trifida	-11908064.13480000000	5171590.20823000000
Ambrosia_trifida	-9298603.78136000000	4292818.15088000000
Ambrosia_trifida	-9208004.12907000000	4601460.21404000000
Ambrosia_trifida	-9224083.08524000000	4779717.72718000000
Ambrosia_trifida	-8202214.25863000000	4749613.74947000000
Ambrosia_trifida	-7104319.16399000000	4924684.30217000000
Ambrosia_trifida	-9001532.17310000000	5231126.31709000000
Ambrosia_trifida	-9102861.09975000000	4457206.18087000000
Ambrosia_trifida	-9148115.09492000000	4450835.92517000000
Ambrosia_trifida	-9212394.25482000000	4567100.08737000000
Ambrosia_trifida	-9108741.55259000000	4697137.24780000000
Ambrosia_trifida	-7957781.60894000000	4657434.40804000000
Ambrosia_trifida	-7508417.59970000000	4796332.82264000000
Ambrosia_trifida	-7164843.46381000000	4890148.89951000000
Ambrosia_trifida	-9307313.59788000000	5387497.84418000000
Ambrosia_trifida	-9413577.79777000000	4028104.20357000000
Ambrosia_trifida	-8045381.11683000000	4963389.71214000000
Ambrosia_trifida	-8979478.30402000000	5151399.95156000000
Ambrosia_trifida	-9059283.07128000000	4252275.51486000000
Ambrosia_trifida	-8045523.43409000000	4561197.56593000000
Ambrosia_trifida	-8892175.58792000000	4610104.48284000000
Ambrosia_trifida	-8201624.24503000000	4924804.57618000000
Ambrosia_trifida	-9383502.05935000000	5352171.18020000000
Ambrosia_trifida	-8807902.05859000000	5155215.56303000000
Ambrosia_trifida	-8944592.72453000000	4294446.84451000000
Ambrosia_trifida	-8098808.46479000000	4302224.68981000000
Ambrosia_trifida	-9193966.34015000000	4564849.42327000000
Ambrosia_trifida	-8241601.01958000000	4842892.94677000000
Ambrosia_trifida	-8232457.40075000000	4753449.09399000000
Ambrosia_trifida	-9024838.43409000000	5148660.06177000000
Ambrosia_trifida	-8814227.69913000000	5116601.93372000000
Ambrosia_trifida	-8490893.00781000000	5211152.61126000000
Ambrosia_trifida	-9120848.07212000000	4457063.37468000000
Ambrosia_trifida	-9180708.16038000000	4620828.00282000000
Ambrosia_trifida	-9179145.08264000000	4623424.31364000000
Ambrosia_trifida	-8512168.23261000000	5095731.86282000000
Ambrosia_trifida	-7869033.52836000000	4233851.51597000000
Ambrosia_trifida	-9102087.27979000000	4426687.54059000000
Ambrosia_trifida	-8206583.15740000000	4892647.82040000000
Ambrosia_trifida	-9356708.30176000000	4311087.15696000000
Ambrosia_trifida	-9151831.74643000000	4457850.19993000000
Ambrosia_trifida	-9208063.95056000000	4748758.06910000000
Ambrosia_trifida	-8932699.82563000000	4725729.80746000000
Ambrosia_trifida	-8932699.82563000000	4725729.80746000000
Ambrosia_trifida	-8934513.76770000000	4725573.78967000000
Ambrosia_trifida	-8696813.06226000000	4963320.80332000000
Ambrosia_trifida	-8095788.44422000000	4510750.50149000000
Ambrosia_trifida	-8974835.38421000000	4753991.89891000000
Ambrosia_trifida	-8932892.79819000000	4970149.27831000000
Ambrosia_trifida	-8087565.40099000000	4126568.73758000000
Ambrosia_trifida	-9237756.63845000000	4463056.62313000000
Ambrosia_trifida	-9151782.53843000000	4493197.84013000000
Ambrosia_trifida	-8809450.18096000000	4505392.30946000000
Ambrosia_trifida	-9027852.66549000000	4748656.98571000000
Ambrosia_trifida	-7063826.76676000000	4935477.23875000000
Ambrosia_trifida	-9329647.27717000000	4169615.73213000000
Ambrosia_trifida	-8066647.65786000000	4626430.27430000000
Ambrosia_trifida	-7536446.86412000000	4699255.74762000000
Ambrosia_trifida	-7903682.33052000000	4736690.03045000000
Ambrosia_trifida	-9371722.04940000000	5321222.01779000000
Ambrosia_trifida	-8919588.78744000000	4370215.25987000000
Ambrosia_trifida	-8819162.00750000000	4422373.53105000000
Ambrosia_trifida	-7897479.22756000000	4668943.77911000000
Ambrosia_trifida	-9047335.65763000000	5219940.91385000000
Ambrosia_trifida	-9354468.37276000000	5293752.20004000000
Ambrosia_trifida	-9247640.69299000000	4487122.27020000000
Ambrosia_trifida	-8768394.30385000000	4504601.57489000000
Ambrosia_trifida	-7969944.76591000000	4819165.99536000000
Ambrosia_trifida	-9004004.15160000000	4501894.37751000000
Ambrosia_trifida	-9147480.21519000000	4674230.67548000000
Ambrosia_trifida	-7972473.18889000000	4682042.95191000000
Ambrosia_trifida	-8940418.72805000000	4741391.58086000000
Ambrosia_trifida	-8926711.88708000000	4753179.33413000000
Ambrosia_trifida	-8023870.46551000000	4764398.69258000000
Ambrosia_trifida	-8704033.13061000000	4935415.59558000000
Ambrosia_trifida	-9436917.82896000000	3962394.00214000000
Ambrosia_trifida	-9491731.68477000000	4123286.93841000000
Ambrosia_trifida	-9189575.24954000000	4654822.85730000000
Ambrosia_trifida	-7866752.20675000000	4817183.42509000000
Ambrosia_trifida	-7902361.91577000000	4816041.11167000000
Ambrosia_trifida	-8097666.06724000000	4270474.51136000000
Ambrosia_trifida	-9108499.75797000000	4668085.01823000000
Ambrosia_trifida	-7916322.99809000000	4641305.37201000000
Ambrosia_trifida	-9075849.76560000000	5091539.34886000000
Ambrosia_trifida	-9428911.39743000000	5477335.61183000000
Ambrosia_trifida	-9072604.93199000000	4460114.21445000000
Ambrosia_trifida	-8619111.69591000000	5039453.05708000000
Ambrosia_trifida	-8962533.96240000000	5183558.88050000000
Ambrosia_trifida	-9308131.80154000000	5301738.50427000000
Ambrosia_trifida	-8881562.09710000000	4480422.28244000000
Ambrosia_trifida	-9195374.07498000000	4490586.51745000000
Ambrosia_trifida	-9131963.29160000000	4408475.53415000000
Ambrosia_trifida	-9130236.18719000000	4408475.53415000000
Ambrosia_trifida	-9130515.99740000000	4411862.55742000000
Ambrosia_trifida	-9130236.18719000000	4408475.53415000000
Ambrosia_trifida	-9130236.18719000000	4408475.53415000000
Ambrosia_trifida	-8726427.59626000000	5421732.52278000000
Ambrosia_trifida	-8928483.37518000000	4991250.89825000000
Ambrosia_trifida	-8752036.98476000000	4982537.70226000000
Ambrosia_trifida	-9095883.21197000000	5164235.54141000000
Ambrosia_trifida	-9286359.67240000000	4421857.56245000000
Ambrosia_trifida	-9246212.69605000000	4454560.78666000000
Ambrosia_trifida	-9232038.86148000000	4449624.45034000000
Ambrosia_trifida	-9240587.54591000000	4443920.85153000000
Ambrosia_trifida	-9192431.24344000000	4555473.41744000000
Ambrosia_trifida	-7849965.52371000000	4579697.01064000000
Ambrosia_trifida	-9171194.61315000000	4693233.77441000000
Ambrosia_trifida	-8246580.09759000000	4669384.38406000000
Ambrosia_trifida	-8047083.13481000000	4696937.17167000000
Ambrosia_trifida	-8696681.35849000000	4995188.00939000000
Ambrosia_trifida	-9301235.92709000000	5425960.23204000000
Ambrosia_trifida	-8221321.91914000000	4261294.96379000000
Ambrosia_trifida	-8161035.36152000000	4494786.87479000000
Ambrosia_trifida	-9146985.81949000000	4705871.02255000000
Ambrosia_trifida	-9244196.13279000000	4793746.81882000000
Ambrosia_trifida	-9159172.42263000000	4592046.39202000000
Ambrosia_trifida	-9066631.46638000000	5195992.96242000000
Ambrosia_trifida	-9263570.57786000000	4440099.13633000000
Ambrosia_trifida	-9141669.81140000000	4566879.56290000000
Ambrosia_trifida	-7934653.46162000000	4681003.32420000000
Ambrosia_trifida	-8917570.77688000000	5154241.29075000000
Ambrosia_trifida	-9483010.86882000000	3637763.28355000000
Ambrosia_trifida	-9067954.29328000000	4741778.16036000000
Ambrosia_trifida	-9220595.58864000000	5182690.82514000000
Ambrosia_trifida	-8076801.87399000000	4422049.64977000000
Ambrosia_trifida	-9235502.71894000000	4719241.05467000000
Ambrosia_trifida	-9110195.98678000000	4754164.04138000000
Ambrosia_trifida	-8201381.67852000000	4866713.24810000000
Ambrosia_trifida	-9308024.70176000000	5249701.86385000000
Ambrosia_trifida	-9231992.06563000000	5206058.85014000000
Ambrosia_trifida	-8982181.27067000000	4335454.23984000000
Ambrosia_trifida	-7821768.37317000000	4625878.49787000000
Ambrosia_trifida	-8164888.05869000000	4720259.19443000000
Ambrosia_trifida	-8044497.30250000000	4737000.17802000000
Ambrosia_trifida	-9001926.80198000000	5121371.86219000000
Ambrosia_trifida	-7883463.63049000000	4276751.25401000000
Ambrosia_trifida	-9212027.60695000000	4556085.80651000000
Ambrosia_trifida	-9210107.52998000000	4541394.53504000000
Ambrosia_trifida	-9197766.93473000000	4583720.46760000000
Ambrosia_trifida	-9417996.86941000000	4019619.32063000000
Ambrosia_trifida	-9401664.63675000000	4198631.83534000000
Ambrosia_trifida	-7981716.57453000000	4186981.45858000000
Ambrosia_trifida	-8513070.95824000000	5029715.37658000000
Ambrosia_trifida	-9195144.43764000000	4496471.10262000000
Ambrosia_trifida	-9149036.53889000000	4596575.14612000000
Ambrosia_trifida	-9107339.99288000000	4624040.92259000000
Ambrosia_trifida	-9102883.29160000000	4609114.26040000000
Ambrosia_trifida	-9018229.12389000000	4904270.68414000000
Ambrosia_trifida	-7417573.83712000000	4937816.55942000000
Ambrosia_trifida	-8962201.95311000000	4550629.53336000000
Ambrosia_trifida	-9339254.41609000000	4618399.94411000000
Ambrosia_trifida	-9340007.00908000000	4615333.83682000000
Ambrosia_trifida	-8201949.98271000000	4693546.20885000000
Ambrosia_trifida	-9373022.68446000000	4387063.94904000000
Ambrosia_trifida	-9194373.51226000000	4529513.71055000000
Ambrosia_trifida	-9189527.00640000000	4530049.67228000000
Ambrosia_trifida	-8960680.84690000000	4728669.16714000000
Ambrosia_trifida	-9286294.06173000000	4452652.78232000000
Ambrosia_trifida	-9237466.69717000000	4496367.88586000000
Ambrosia_trifida	-9229694.24487000000	4660385.33567000000
Ambrosia_trifida	-7616784.23564000000	4649377.44497000000
Ambrosia_trifida	-9275781.88149000000	4770872.98725000000
Ambrosia_trifida	-9064678.10164000000	5058606.04153000000
Ambrosia_trifida	-8773575.61710000000	5017199.49079000000
Ambrosia_trifida	-9190661.20262000000	5125666.63854000000
Ambrosia_trifida	-8149921.58933000000	4070691.21961000000
Ambrosia_trifida	-7953663.67098000000	4522889.59286000000
Ambrosia_trifida	-8239633.08541000000	4700304.71829000000
Ambrosia_trifida	-9243336.44003000000	5511141.45542000000
Ambrosia_trifida	-9055572.20894000000	4449909.82570000000
Ambrosia_trifida	-9237072.55072000000	4531708.69290000000
Ambrosia_trifida	-9203028.33160000000	4630865.49548000000
Ambrosia_trifida	-7901259.94597000000	4788120.01627000000
Ambrosia_trifida	-9435324.84048000000	4385431.73910000000
Ambrosia_trifida	-8856801.78786000000	4495383.00590000000
Ambrosia_trifida	-8082478.74078000000	4720966.79967000000
Ambrosia_trifida	-9390862.61173000000	4219727.19801000000
Ambrosia_trifida	-7062129.95903000000	4876027.02718000000
Ambrosia_trifida	-7067096.68679000000	4881146.50579000000
Ambrosia_trifida	-9276903.05207000000	4833578.51313000000
Ambrosia_trifida	-9114094.03250000000	4421381.41089000000
Ambrosia_trifida	-7850681.06597000000	4786608.53356000000
Ambrosia_trifida	-9161897.19519000000	5154951.50413000000
Ambrosia_trifida	-8876868.03956000000	5143390.52441000000
Ambrosia_trifida	-9279596.94901000000	5180188.96551000000
Ambrosia_trifida	-9190569.05823000000	4660781.07287000000
Ambrosia_trifida	-9196518.40227000000	4660799.07838000000
Ambrosia_trifida	-9193782.05136000000	4671487.12443000000
Ambrosia_trifida	-8083979.48838000000	4698922.91201000000
Ambrosia_trifida	-7559781.10613000000	4753164.30377000000
Ambrosia_trifida	-9302543.31618000000	5218721.39823000000
Ambrosia_trifida	-9368036.27349000000	4416822.79357000000
Ambrosia_trifida	-8678322.43151000000	5035366.65393000000
Ambrosia_trifida	-7585105.28119000000	4639312.72545000000
Ambrosia_trifida	-8164482.33388000000	4243136.86896000000
Ambrosia_trifida	-8014138.37685000000	4640789.87596000000
Ambrosia_trifida	-8003407.65520000000	4348077.87216000000
Ambrosia_trifida	-9180448.12986000000	4686308.52024000000
Ambrosia_trifida	-9129037.44164000000	5086529.70420000000
Ambrosia_trifida	-8865865.70902000000	4382908.61502000000
Ambrosia_trifida	-7611257.50151000000	4486709.59550000000
Ambrosia_trifida	-7580742.75052000000	4594332.09529000000
Ambrosia_trifida	-7775285.14280000000	4733535.88728000000
Ambrosia_trifida	-8882526.95990000000	4405015.38484000000
Ambrosia_trifida	-8843932.44780000000	4412179.69674000000
Ambrosia_trifida	-9230504.72962000000	4585030.46088000000
Ambrosia_trifida	-9236344.07930000000	4573133.86175000000
Ambrosia_trifida	-7824320.43529000000	4735800.60041000000
Ambrosia_trifida	-8924680.85088000000	4398621.39694000000
Ambrosia_trifida	-8057658.03113000000	4331686.90860000000
Ambrosia_trifida	-8975196.24290000000	4474574.60429000000
Ambrosia_trifida	-9310398.26426000000	5349664.66491000000
Ambrosia_trifida	-8957786.25849000000	4477379.49943000000
Ambrosia_trifida	-8959715.98410000000	4477379.49943000000
Ambrosia_trifida	-9273304.59625000000	4815670.67176000000
Ambrosia_trifida	-8055680.54482000000	4481606.61161000000
Ambrosia_trifida	-9234798.36909000000	4652267.78246000000
Ambrosia_trifida	-9243183.50928000000	4649915.89449000000
Ambrosia_trifida	-7667324.71410000000	4737408.82693000000
Ambrosia_trifida	-9266218.16139000000	4937654.26226000000
Ambrosia_trifida	-9441735.96785000000	4143722.02897000000
Ambrosia_trifida	-7755884.64643000000	4636627.32405000000
Ambrosia_trifida	-7824194.03826000000	4763823.31507000000
Ambrosia_trifida	-8827641.70424000000	5058331.17368000000
Ambrosia_trifida	-9030142.28492000000	5090271.73354000000
Ambrosia_trifida	-9500383.60952000000	4162477.22258000000
Ambrosia_trifida	-9399206.16633000000	4256056.06850000000
Ambrosia_trifida	-9028221.24308000000	4374237.89121000000
Ambrosia_trifida	-7789460.90709000000	4578476.12828000000
Ambrosia_trifida	-8919856.53686000000	5183631.66576000000
Ambrosia_trifida	-9238030.65948000000	4546361.88622000000
Ambrosia_trifida	-8885122.44084000000	4982892.69507000000
Ambrosia_trifida	-8478442.41821000000	5269891.99479000000
Ambrosia_trifida	-9444756.37437000000	4200731.70800000000
Ambrosia_trifida	-9486824.77851000000	4378486.07254000000
Ambrosia_trifida	-7859124.00143000000	4684141.06325000000
Ambrosia_trifida	-8862537.89722000000	5217946.18437000000
Ambrosia_trifida	-9423230.28525000000	5310910.40976000000
Ambrosia_trifida	-7785179.32841000000	4345963.08252000000
Ambrosia_trifida	-9006994.26142000000	4468243.88831000000
Ambrosia_trifida	-9011868.74830000000	4468932.78808000000
Ambrosia_trifida	-8088062.30533000000	4490583.78314000000
Ambrosia_trifida	-7742324.46460000000	4658965.14704000000
Ambrosia_trifida	-7304215.96591000000	4797151.32399000000
Ambrosia_trifida	-9354109.44380000000	5236425.15541000000
Ambrosia_trifida	-7741058.56461000000	4345315.38613000000
Ambrosia_trifida	-9196454.72132000000	4632508.90461000000
Ambrosia_trifida	-8201865.46073000000	4721801.31592000000
Ambrosia_trifida	-7751188.65917000000	4803845.16543000000
Ambrosia_trifida	-8505754.78956000000	5400204.95905000000
Ambrosia_trifida	-9133220.12189000000	4290346.58133000000
Ambrosia_trifida	-9288039.49854000000	4548623.23844000000
Ambrosia_trifida	-9280938.10831000000	4548623.23844000000
Ambrosia_trifida	-7793447.72019000000	4806300.81390000000
Ambrosia_trifida	-9041983.08123000000	4221223.90006000000
Ambrosia_trifida	-9220434.07061000000	4689660.19958000000
Ambrosia_trifida	-9218038.70221000000	4690456.39240000000
Ambrosia_trifida	-7723852.16625000000	4670193.98087000000
Ambrosia_trifida	-7266033.45022000000	4867295.52557000000
Ambrosia_trifida	-8994833.13066000000	5090652.78716000000
Ambrosia_trifida	-8919473.87228000000	5221716.67217000000
Ambrosia_trifida	-8793321.53435000000	5223070.94406000000
Ambrosia_trifida	-9101700.36980000000	4396536.75825000000
Ambrosia_trifida	-8777473.66282000000	4442578.57326000000
Ambrosia_trifida	-9218867.51936000000	4837447.93523000000
Ambrosia_trifida	-9093280.59104000000	4778927.76205000000
Ambrosia_trifida	-7793845.82259000000	4782243.11128000000
Ambrosia_trifida	-9296935.53358000000	4848465.06061000000
Ambrosia_trifida	-7503773.71504000000	4969736.28329000000
Ambrosia_trifida	-8852851.63954000000	5123369.65947000000
Ambrosia_trifida	-9158810.59908000000	5446934.31545000000
Ambrosia_trifida	-9266831.81414000000	4485713.83581000000
Ambrosia_trifida	-9277173.21365000000	4554250.89631000000
Ambrosia_trifida	-7780736.61763000000	4668678.25644000000
Ambrosia_trifida	-9363115.47320000000	4611160.62235000000
Ambrosia_trifida	-7834454.38930000000	4821178.67054000000
Ambrosia_trifida	-9123426.66796000000	5058611.61304000000
Ambrosia_trifida	-9025515.76778000000	4337887.60117000000
Ambrosia_trifida	-9154910.62363000000	4742404.42264000000
Ambrosia_trifida	-8946433.29681000000	5126678.73776000000
Ambrosia_trifida	-8048854.62292000000	4527295.91055000000
Ambrosia_trifida	-9120566.33218000000	5191260.72015000000
Ambrosia_trifida	-9128570.83399000000	5230218.86845000000
Ambrosia_trifida	-9283531.65952000000	4970613.15625000000
Ambrosia_trifida	-8959913.78097000000	5090990.97689000000
Ambrosia_trifida	-7952589.29625000000	4746135.46092000000
Ambrosia_trifida	-7774959.59809000000	4758092.63563000000
Ambrosia_trifida	-8162122.76190000000	4890035.20572000000
Ambrosia_trifida	-7313685.12945000000	4883819.67320000000
Ambrosia_trifida	-9284686.60030000000	4495428.14397000000
Ambrosia_trifida	-7822591.01520000000	4554128.69328000000
Ambrosia_trifida	-8116426.85957000000	4417430.08021000000
Ambrosia_trifida	-7823090.23521000000	4680425.64179000000
Ambrosia_trifida	-7696035.17165000000	4843464.33519000000
Ambrosia_trifida	-9374373.97481000000	4594552.68705000000
Ambrosia_trifida	-7814174.90292000000	4708808.58599000000
Ambrosia_trifida	-9405033.93765000000	4429507.99312000000
Ambrosia_trifida	-9293700.34860000000	4886828.66004000000
Ambrosia_trifida	-8867693.64160000000	5310200.73624000000
Ambrosia_trifida	-8743546.19210000000	5083438.52839000000
Ambrosia_trifida	-8742645.01024000000	5155581.42823000000
Ambrosia_trifida	-9303062.41237000000	4677006.69960000000
Ambrosia_trifida	-7742815.57977000000	4725610.05041000000
Ambrosia_trifida	-9093481.66845000000	4259282.86359000000
Ambrosia_trifida	-8926818.02198000000	4259463.90646000000
Ambrosia_trifida	-9285802.94656000000	4719856.07647000000
Ambrosia_trifida	-7832036.44312000000	4852758.23906000000
Ambrosia_trifida	-8797890.73864000000	5326141.64988000000
Ambrosia_trifida	-7832462.52653000000	4294894.18663000000
Ambrosia_trifida	-8764181.71286000000	5050747.54450000000
Ambrosia_trifida	-9464381.68377000000	5090852.21357000000
Ambrosia_trifida	-7868138.71460000000	4298249.83772000000
Ambrosia_trifida	-8991314.27602000000	4402933.44858000000
Ambrosia_trifida	-9323832.04906000000	4826462.20107000000
Ambrosia_trifida	-7729287.23842000000	4870491.14296000000
Ambrosia_trifida	-9262325.90485000000	4693164.84589000000
Ambrosia_trifida	-9246588.99254000000	4697328.85483000000
Ambrosia_trifida	-9159720.85065000000	4836516.88635000000
Ambrosia_trifida	-9118062.51321000000	4870496.22259000000
Ambrosia_trifida	-9419887.03564000000	5279636.46246000000
Ambrosia_trifida	-9284207.06348000000	4855496.08951000000
Ambrosia_trifida	-9105410.26728000000	4383483.59221000000
Ambrosia_trifida	-8915250.28184000000	5088741.25407000000
Ambrosia_trifida	-7752894.53660000000	4774139.27716000000
Ambrosia_trifida	-9325547.57512000000	4979581.57849000000
Ambrosia_trifida	-9284382.66851000000	4570106.57593000000
Ambrosia_trifida	-9284382.66851000000	4572280.49858000000
Ambrosia_trifida	-8942364.85632000000	5322519.21014000000
Ambrosia_trifida	-9314524.98246000000	4412650.26709000000
Ambrosia_trifida	-9329120.46208000000	4783694.30068000000
Ambrosia_trifida	-9343432.27203000000	4429617.82586000000
Ambrosia_trifida	-7867607.07519000000	4468226.11402000000
Ambrosia_trifida	-8885321.20257000000	5058417.53563000000
Ambrosia_trifida	-8118965.41360000000	4344947.52037000000
Ambrosia_trifida	-7801317.14121000000	4599959.11948000000
Ambrosia_trifida	-9327193.63106000000	4718287.51338000000
Ambrosia_trifida	-7792395.05488000000	4744590.89526000000
Ambrosia_trifida	-6796843.82607000000	5177996.63842000000
Ambrosia_trifida	-9421672.99668000000	4586295.22984000000
Ambrosia_trifida	-7778464.36573000000	4716584.63771000000
Ambrosia_trifida	-8066665.02539000000	4502456.27886000000
Ambrosia_trifida	-9332859.30544000000	4637249.33705000000
Ambrosia_trifida	-9264494.53048000000	4685051.46635000000
Ambrosia_trifida	-9276098.35649000000	4796244.10185000000
Ambrosia_trifida	-9290451.65554000000	4826739.85634000000
Ambrosia_trifida	-9093067.74231000000	4807319.30564000000
Ambrosia_trifida	-9302686.11588000000	4574183.40161000000
Ambrosia_trifida	-9309787.50610000000	4568413.07276000000
Ambrosia_trifida	-9007019.34785000000	5058010.97291000000
Ambrosia_trifida	-9422156.39295000000	4621216.71390000000
Ambrosia_trifida	-9375028.63422000000	4643014.98944000000
Ambrosia_trifida	-9414639.14685000000	4618728.37747000000
Ambrosia_trifida	-9428511.94423000000	5398556.67659000000
Ambrosia_trifida	-9005766.95594000000	4432332.73610000000
Ambrosia_trifida	-8855019.68626000000	5087107.89601000000
Ambrosia_trifida	-9349173.20570000000	4530372.03672000000
Ambrosia_trifida	-9244343.75680000000	4870839.90285000000
Ambrosia_trifida	-8934121.45448000000	4473313.46691000000
Ambrosia_trifida	-8828333.51087000000	4468186.19789000000
Ambrosia_trifida	-7740361.35474000000	4692850.91698000000
Ambrosia_trifida	-7667207.57976000000	4786451.70463000000
Ambrosia_trifida	-9458221.99964000000	5085840.37818000000
Ambrosia_trifida	-9303708.87045000000	4881884.62331000000
Ambrosia_trifida	-9329593.63080000000	4733084.32150000000
Ambrosia_trifida	-9396486.21809000000	4996224.44200000000
Ambrosia_trifida	-9094588.36608000000	4337973.50531000000
Ambrosia_trifida	-9316396.81630000000	4549597.91897000000
Ambrosia_trifida	-9324135.01598000000	4541756.64083000000
Ambrosia_trifida	-9319773.83611000000	4544713.17573000000
Ambrosia_trifida	-9470664.48440000000	5058924.25867000000
Ambrosia_trifida	-9462505.99049000000	5058457.46597000000
Ambrosia_trifida	-7635257.98129000000	4525066.86642000000
Ambrosia_trifida	-7710418.38145000000	4795775.75239000000
Ambrosia_trifida	-9209356.86672000000	5233713.77553000000
Ambrosia_trifida	-8873275.85535000000	4438421.47348000000
Ambrosia_trifida	-9294898.22577000000	4645839.93305000000
Ambrosia_trifida	-7949859.69938000000	4453804.76441000000
Ambrosia_trifida	-9282009.10602000000	4603605.80119000000
Ambrosia_trifida	-9018111.41063000000	4379405.29120000000
Ambrosia_trifida	-7665468.31807000000	4489000.85787000000
Ambrosia_trifida	-11431536.24660000000	5290256.58953000000
Ambrosia_trifida	-11766376.44440000000	4501015.29272000000
Ambrosia_trifida	-8082690.43168000000	4745017.55039000000
Ambrosia_trifida	-9343148.02345000000	4484844.32687000000
Ambrosia_trifida	-7382943.94628000000	4880957.53746000000
Ambrosia_trifida	-9053275.83547000000	4417082.17408000000
Ambrosia_trifida	-9422715.04851000000	4665874.18472000000
Ambrosia_trifida	-9340566.62950000000	4417068.16754000000
Ambrosia_trifida	-9325601.60744000000	4654624.82280000000
Ambrosia_trifida	-9321993.02056000000	4643139.16481000000
Ambrosia_trifida	-9196000.27094000000	4870065.20593000000
Ambrosia_trifida	-9364514.52426000000	4478130.16511000000
Ambrosia_trifida	-9332339.24439000000	5021557.72523000000
Ambrosia_trifida	-9311562.85366000000	4615453.32020000000
Ambrosia_trifida	-9591729.10076000000	4155182.35429000000
Ambrosia_trifida	-7707402.22033000000	4405345.08553000000
Ambrosia_trifida	-9313740.54901000000	4685286.09701000000
Ambrosia_trifida	-9338749.79285000000	4892767.29171000000
Ambrosia_trifida	-9403747.77554000000	4475705.45256000000
Ambrosia_trifida	-9515534.85011000000	5000751.04754000000
Ambrosia_trifida	-9247284.65862000000	5126660.39267000000
Ambrosia_trifida	-9017720.64120000000	4258195.37871000000
Ambrosia_trifida	-9324770.47462000000	4576808.89271000000
Ambrosia_trifida	-9235042.47938000000	5306398.18280000000
Ambrosia_trifida	-7905945.41622000000	4490116.60684000000
Ambrosia_trifida	-9342949.84063000000	4771194.19940000000
Ambrosia_trifida	-8657947.42371000000	5209971.92485000000
Ambrosia_trifida	-11704810.47870000000	4327778.90888000000
Ambrosia_trifida	-9319901.68043000000	4538157.42891000000
Ambrosia_trifida	-9226309.50616000000	4970494.55026000000
Ambrosia_trifida	-8921350.14448000000	4433188.38761000000
Ambrosia_trifida	-7239723.57132000000	4836483.44970000000
Ambrosia_trifida	-9181324.12880000000	5058413.07827000000
Ambrosia_trifida	-8135293.78681000000	4443019.40164000000
Ambrosia_trifida	-9334998.40627000000	4607744.84339000000
Ambrosia_trifida	-9373225.30564000000	4723604.44126000000
Ambrosia_trifida	-6931906.76846000000	5082318.49432000000
Ambrosia_trifida	-9453812.19069000000	4255098.62597000000
Ambrosia_trifida	-8979013.24015000000	4424446.25934000000
Ambrosia_trifida	-9332895.97022000000	4911337.39556000000
Ambrosia_trifida	-9033656.79767000000	5402916.47377000000
Ambrosia_trifida	-9445109.51416000000	4445601.81152000000
Ambrosia_trifida	-9436145.93872000000	4577477.25410000000
Ambrosia_trifida	-9471623.94397000000	4654070.29642000000
Ambrosia_trifida	-7963594.13543000000	4782849.43194000000
Ambrosia_trifida	-8793965.67676000000	5261073.62885000000
Ambrosia_trifida	-9320420.29419000000	4574183.40161000000
Ambrosia_trifida	-9358020.99760000000	4736824.07075000000
Ambrosia_trifida	-8949188.36606000000	5058114.79870000000
Ambrosia_trifida	-9367458.32067000000	4685844.93930000000
Ambrosia_trifida	-8732445.44556000000	5199272.84479000000
Ambrosia_trifida	-7378761.65197000000	4943656.25642000000
Ambrosia_trifida	-9368595.31500000000	4544196.87284000000
Ambrosia_trifida	-9463181.39445000000	4426253.95890000000
Ambrosia_trifida	-9336224.74689000000	4575234.79292000000
Ambrosia_trifida	-9315788.95274000000	4915712.35030000000
Ambrosia_trifida	-9419888.00050000000	4491720.66474000000
Ambrosia_trifida	-7609231.28962000000	4608643.26629000000
Ambrosia_trifida	-9279801.49993000000	5003168.39695000000
Ambrosia_trifida	-9462385.96155000000	5352597.62253000000
Ambrosia_trifida	-9244391.03508000000	5387018.37062000000
Ambrosia_trifida	-9157053.58392000000	4870605.76913000000
Ambrosia_trifida	-9477996.86278000000	5399015.41229000000
Ambrosia_trifida	-9338164.12113000000	4475532.95420000000
Ambrosia_trifida	-7746409.69371000000	4373391.58347000000
Ambrosia_trifida	-9476016.96431000000	4612494.52300000000
Ambrosia_trifida	-9296318.02138000000	4721779.25307000000
Ambrosia_trifida	-9551985.43706000000	3853461.18830000000
Ambrosia_trifida	-9090392.66019000000	4301523.66371000000
Ambrosia_trifida	-8154434.73508000000	4347807.68821000000
Ambrosia_trifida	-9282855.29070000000	5030304.54250000000
Ambrosia_trifida	-7124974.36795000000	5047992.58854000000
Ambrosia_trifida	-9400168.13454000000	4512243.24952000000
Ambrosia_trifida	-9400426.71777000000	4512166.90751000000
Ambrosia_trifida	-9372714.89322000000	4792245.46699000000
Ambrosia_trifida	-9366675.81694000000	4796084.11048000000
Ambrosia_trifida	-9407229.00053000000	4970111.56307000000
Ambrosia_trifida	-9369608.99986000000	4776273.11022000000
Ambrosia_trifida	-9729744.04090000000	5512950.88948000000
Ambrosia_trifida	-9524761.35066000000	5467001.26269000000
Ambrosia_trifida	-9063921.16677000000	4356744.77623000000
Ambrosia_trifida	-9506803.42067000000	5311559.98303000000
Ambrosia_trifida	-8058616.13989000000	4280426.18645000000
Ambrosia_trifida	-7994334.08540000000	4418050.60926000000
Ambrosia_trifida	-7723530.86694000000	4641940.76130000000
Ambrosia_trifida	-8452602.42749000000	5329063.09659000000
Ambrosia_trifida	-8763848.83519000000	4462147.43762000000
Ambrosia_trifida	-8756787.96920000000	4461751.40780000000
Ambrosia_trifida	-9371207.77752000000	4921108.43710000000
Ambrosia_trifida	-8921336.63640000000	5408977.66047000000
Ambrosia_trifida	-7663273.25519000000	4823119.16421000000
Ambrosia_trifida	-9359053.40080000000	4923103.79848000000
Ambrosia_trifida	-9504631.90044000000	4433398.97004000000
Ambrosia_trifida	-9509157.10699000000	4436969.02894000000
Ambrosia_trifida	-9420891.45781000000	4689776.64928000000
Ambrosia_trifida	-9421911.89671000000	4690176.91775000000
Ambrosia_trifida	-9473629.89374000000	5438688.85358000000
Ambrosia_trifida	-8961161.83101000000	4435024.87526000000
Ambrosia_trifida	-7571681.14502000000	4804671.24253000000
Ambrosia_trifida	-9588825.82859000000	5096512.56210000000
Ambrosia_trifida	-9710136.09902000000	5465331.24217000000
Ambrosia_trifida	-9053451.44050000000	4376600.25593000000
Ambrosia_trifida	-9475582.77605000000	4647205.39173000000
Ambrosia_trifida	-9345757.59138000000	4825292.09507000000
Ambrosia_trifida	-9226548.79213000000	5003268.53164000000
Ambrosia_trifida	-9442658.76264000000	4583540.45004000000
Ambrosia_trifida	-8540372.13719000000	5288397.83153000000
Ambrosia_trifida	-9490207.20155000000	5032010.94389000000
Ambrosia_trifida	-9494771.00260000000	5035082.73514000000
Ambrosia_trifida	-7741269.86956000000	4598197.61562000000
Ambrosia_trifida	-9416993.41209000000	4850417.17241000000
Ambrosia_trifida	-9547801.79195000000	5356741.86053000000
Ambrosia_trifida	-9492392.13336000000	4217791.41482000000
Ambrosia_trifida	-9421648.39268000000	4546854.11589000000
Ambrosia_trifida	-9202860.44547000000	5408510.20481000000
Ambrosia_trifida	-9624051.52222000000	4123799.79792000000
Ambrosia_trifida	-9646569.00787000000	5466785.76184000000
Ambrosia_trifida	-9409861.14626000000	4859443.85493000000
Ambrosia_trifida	-7295338.74569000000	4847147.28542000000
Ambrosia_trifida	-9239650.08521000000	5090340.70738000000
Ambrosia_trifida	-7622394.91284000000	4816955.61653000000
Ambrosia_trifida	-9346481.23848000000	4948187.87441000000
Ambrosia_trifida	-9344098.02736000000	4944466.60707000000
Ambrosia_trifida	-9422455.50042000000	4656074.10775000000
Ambrosia_trifida	-7233072.28960000000	4919868.15903000000
Ambrosia_trifida	-8307196.25235000000	4214561.35473000000
Ambrosia_trifida	-9464292.53045000000	4503771.93725000000
Ambrosia_trifida	-7877930.14232000000	4443990.74596000000
Ambrosia_trifida	-9475428.01205000000	4577724.48322000000
Ambrosia_trifida	-8565774.08019000000	5240377.94916000000
Ambrosia_trifida	-7490878.32368000000	4827979.84506000000
Ambrosia_trifida	-9463876.09567000000	4689412.12167000000
Ambrosia_trifida	-9587023.46488000000	5451546.11278000000
Ambrosia_trifida	-9468701.95346000000	4463212.63244000000
Ambrosia_trifida	-9500331.50693000000	5510980.48210000000
Ambrosia_trifida	-9471131.86394000000	4522792.78802000000
Ambrosia_trifida	-7353634.30893000000	4775974.51639000000
Ambrosia_trifida	-9416747.95099000000	4792244.10867000000
Ambrosia_trifida	-9409370.99595000000	4793465.51144000000
Ambrosia_trifida	-9534260.90738000000	3786101.93086000000
Ambrosia_trifida	-9042990.39799000000	4304271.43115000000
Ambrosia_trifida	-7572392.24891000000	4569500.36693000000
Ambrosia_trifida	-9529692.28201000000	4642820.78747000000
Ambrosia_trifida	-7645226.46133000000	4854871.50058000000
Ambrosia_trifida	-7046880.30244000000	5049043.10797000000
Ambrosia_trifida	-8201077.16782000000	4297961.62305000000
Ambrosia_trifida	-9371991.24612000000	4826141.87406000000
Ambrosia_trifida	-9368547.65078000000	4825041.11653000000
Ambrosia_trifida	-9571495.34888000000	5096260.30423000000
Ambrosia_trifida	-9669276.08906000000	5266961.70327000000
Ambrosia_trifida	-9309777.85748000000	4523791.02776000000
Ambrosia_trifida	-9444141.75677000000	4960955.99292000000
Ambrosia_trifida	-9349462.66454000000	5141273.67170000000
Ambrosia_trifida	-9453233.65895000000	4838724.37738000000
Ambrosia_trifida	-9455101.63334000000	4842705.71347000000
Ambrosia_trifida	-9529597.72546000000	4600354.95195000000
Ambrosia_trifida	-9518072.43928000000	4970535.84578000000
Ambrosia_trifida	-7436781.36093000000	4782421.22379000000
Ambrosia_trifida	-7610484.64640000000	4559639.66799000000
Ambrosia_trifida	-9473814.18253000000	4472000.95730000000
Ambrosia_trifida	-9474856.23436000000	4472000.95730000000
Ambrosia_trifida	-9552652.15726000000	4265147.54389000000
Ambrosia_trifida	-9458482.51260000000	4568443.13837000000
Ambrosia_trifida	-9759731.97680000000	3647047.24933000000
Ambrosia_trifida	-9583017.35452000000	5087161.66535000000
Ambrosia_trifida	-8709000.24432000000	5299172.00142000000
Ambrosia_trifida	-9644073.87266000000	5078405.76426000000
Ambrosia_trifida	-9239267.61359000000	5058178.87627000000
Ambrosia_trifida	-7016250.73277000000	4994091.01220000000
Ambrosia_trifida	-9530114.50598000000	4985607.35796000000
Ambrosia_trifida	-9339233.18911000000	5122196.11228000000
Ambrosia_trifida	-7720198.23082000000	4485943.05345000000
Ambrosia_trifida	-7300943.15128000000	4987094.34195000000
Ambrosia_trifida	-9653234.76254000000	5248714.55508000000
Ambrosia_trifida	-9655382.06471000000	5254248.09448000000
Ambrosia_trifida	-8217502.99217000000	4217725.95611000000
Ambrosia_trifida	-9376412.24748000000	5177945.67070000000
Ambrosia_trifida	-9646235.16534000000	5135983.62734000000
Ambrosia_trifida	-9474981.08760000000	4542774.46567000000
Ambrosia_trifida	-7002026.24291000000	5048709.82420000000
Ambrosia_trifida	-9538773.57071000000	4381968.43841000000
Ambrosia_trifida	-9288892.43725000000	5126092.58161000000
Ambrosia_trifida	-9627298.76798000000	5356528.30396000000
Ambrosia_trifida	-7823799.02343000000	4510898.06254000000
Ambrosia_trifida	-9458562.59621000000	4821015.91400000000
Ambrosia_trifida	-9455771.24812000000	4822839.80711000000
Ambrosia_trifida	-9378006.20083000000	5151016.45121000000
Ambrosia_trifida	-8020807.99098000000	4375992.31090000000
Ambrosia_trifida	-9598663.56972000000	5139501.07736000000
Ambrosia_trifida	-9647352.47646000000	5124699.22121000000
Ambrosia_trifida	-9455452.84340000000	4765195.66126000000
Ambrosia_trifida	-9287172.56931000000	5090784.81563000000
Ambrosia_trifida	-7718742.63879000000	4621041.91096000000
Ambrosia_trifida	-9476692.36827000000	4685984.42100000000
Ambrosia_trifida	-9503560.90273000000	4512207.30021000000
Ambrosia_trifida	-9499836.53231000000	4829518.64108000000
Ambrosia_trifida	-9531397.19458000000	4685892.25496000000
Ambrosia_trifida	-9521699.74450000000	4428979.63118000000
Ambrosia_trifida	-9694153.14670000000	5356584.41171000000
Ambrosia_trifida	-8111016.87383000000	4213047.67862000000
Ambrosia_trifida	-9460539.60009000000	4758354.97948000000
Ambrosia_trifida	-7801593.09197000000	4472984.09176000000
Ambrosia_trifida	-9583553.81824000000	4642986.42483000000
Ambrosia_trifida	-9583451.54278000000	4642940.80056000000
Ambrosia_trifida	-7630810.44620000000	4770826.26418000000
Ambrosia_trifida	-9563594.66630000000	4680046.01818000000
Ambrosia_trifida	-9457684.57106000000	4792682.63702000000
Ambrosia_trifida	-9456128.24736000000	4789127.96268000000
Ambrosia_trifida	-9388558.90530000000	5210175.54180000000
Ambrosia_trifida	-7542197.44642000000	4576880.26626000000
Ambrosia_trifida	-9671480.80057000000	5295475.68283000000
Ambrosia_trifida	-9542174.71209000000	4455313.68289000000
Ambrosia_trifida	-7641399.81546000000	4618263.88865000000
Ambrosia_trifida	-8135653.68063000000	4184402.14917000000
Ambrosia_trifida	-9538257.36911000000	4603804.26805000000
Ambrosia_trifida	-9417577.15409000000	5213546.92490000000
Ambrosia_trifida	-9762899.23543000000	5245138.18531000000
Ambrosia_trifida	-7945766.75137000000	4417971.28241000000
Ambrosia_trifida	-9537437.23573000000	4986974.56217000000
Ambrosia_trifida	-9681528.88179000000	5409230.44124000000
Ambrosia_trifida	-9775545.11327000000	5411323.14997000000
Ambrosia_trifida	-9528543.51636000000	4556095.44370000000
Ambrosia_trifida	-7588700.55297000000	4845060.40804000000
Ambrosia_trifida	-9823939.73685000000	5384997.76872000000
Ambrosia_trifida	-7969907.23275000000	4377179.59008000000
Ambrosia_trifida	-8270815.13552000000	4239754.57804000000
Ambrosia_trifida	-9525083.13241000000	4511346.88891000000
Ambrosia_trifida	-9493371.95154000000	4753416.49696000000
Ambrosia_trifida	-7648687.42421000000	4883063.42062000000
Ambrosia_trifida	-7268907.19759000000	4810149.73715000000
Ambrosia_trifida	-9503690.19435000000	4724559.09607000000
Ambrosia_trifida	-11338976.95800000000	5348626.01942000000
Ambrosia_trifida	-10084456.55300000000	5458033.47816000000
Ambrosia_trifida	-9618619.82707000000	4226426.05244000000
Ambrosia_trifida	-9557795.84086000000	4594952.71085000000
Ambrosia_trifida	-8073262.37129000000	4378917.03360000000
Ambrosia_trifida	-9541373.87596000000	4550250.98339000000
Ambrosia_trifida	-9720816.16538000000	5125364.15560000000
Ambrosia_trifida	-9715450.56334000000	4148292.16961000000
Ambrosia_trifida	-7916537.19764000000	4269982.14703000000
Ambrosia_trifida	-9533413.75784000000	4637414.11267000000
Ambrosia_trifida	-9527034.47094000000	4472074.45566000000
Ambrosia_trifida	-9505611.23619000000	4825819.40758000000
Ambrosia_trifida	-8817673.70663000000	5404428.17971000000
Ambrosia_trifida	-9797718.62533000000	5464627.86484000000
Ambrosia_trifida	-9572249.48564000000	4715834.37330000000
Ambrosia_trifida	-9771957.75337000000	5333942.86969000000
Ambrosia_trifida	-9594526.23803000000	5280720.46930000000
Ambrosia_trifida	-8994748.22273000000	4294468.22614000000
Ambrosia_trifida	-9585854.05116000000	4431562.30435000000
Ambrosia_trifida	-9503931.02410000000	4758279.88583000000
Ambrosia_trifida	-7787779.15123000000	4412505.72314000000
Ambrosia_trifida	-9598144.08759000000	5310137.18100000000
Ambrosia_trifida	-7915302.17325000000	4433288.78226000000
Ambrosia_trifida	-7381729.76293000000	4847775.81180000000
Ambrosia_trifida	-7523810.05599000000	4747677.91139000000
Ambrosia_trifida	-9531339.30282000000	4944486.49277000000
Ambrosia_trifida	-9569362.61614000000	5013909.54257000000
Ambrosia_trifida	-11250060.99130000000	5470657.18672000000
Ambrosia_trifida	-9985101.73562000000	5514437.71114000000
Ambrosia_trifida	-9637125.89562000000	3912019.13850000000
Ambrosia_trifida	-7594954.21474000000	4755462.77327000000
Ambrosia_trifida	-9579311.31649000000	4425079.00156000000
Ambrosia_trifida	-9594701.84306000000	5125195.33767000000
Ambrosia_trifida	-9635332.21567000000	5279126.52705000000
Ambrosia_trifida	-9635332.21567000000	5279126.52705000000
Ambrosia_trifida	-9562330.69603000000	4554660.16629000000
Ambrosia_trifida	-11652818.84660000000	5366141.08124000000
Ambrosia_trifida	-11652818.84660000000	5366141.08124000000
Ambrosia_trifida	-11652818.84660000000	5366141.08124000000
Ambrosia_trifida	-11652818.84660000000	5366141.08124000000
Ambrosia_trifida	-7591454.65735000000	4923685.06185000000
Ambrosia_trifida	-9585625.37867000000	4685873.42731000000
Ambrosia_trifida	-10133828.58260000000	5470703.19159000000
Ambrosia_trifida	-9587069.77829000000	4707850.63172000000
Ambrosia_trifida	-7685044.41947000000	4699326.68093000000
Ambrosia_trifida	-9581929.95414000000	4560453.37180000000
Ambrosia_trifida	-7795744.09366000000	4537023.42870000000
Ambrosia_trifida	-9616893.68752000000	4262268.17107000000
Ambrosia_trifida	-9611779.91466000000	4341990.37488000000
Ambrosia_trifida	-9574548.75370000000	4526053.91663000000
Ambrosia_trifida	-7573171.85805000000	4708109.04701000000
Ambrosia_trifida	-8081283.17928000000	4204790.01700000000
Ambrosia_trifida	-9538054.74792000000	4858498.07629000000
Ambrosia_trifida	-9549963.56706000000	4859615.42412000000
Ambrosia_trifida	-9562349.99329000000	4469543.83912000000
Ambrosia_trifida	-9631048.22483000000	4430122.87333000000
Ambrosia_trifida	-9984132.04850000000	5475150.57293000000
Ambrosia_trifida	-9582511.76641000000	4599780.60359000000
Ambrosia_trifida	-9593640.49397000000	4527520.64270000000
Ambrosia_trifida	-9581480.32807000000	4495969.77984000000
Ambrosia_trifida	-7980534.61760000000	4288288.84086000000
Ambrosia_trifida	-7756957.57387000000	4423545.01154000000
Ambrosia_trifida	-7726568.25504000000	4433485.69080000000
Ambrosia_trifida	-7762328.00022000000	4502678.92463000000
Ambrosia_trifida	-9588189.01914000000	4499928.05123000000
Ambrosia_trifida	-9590832.74322000000	4499928.05123000000
Ambrosia_trifida	-7786235.37074000000	4438642.00848000000
Ambrosia_trifida	-7706178.38835000000	4586177.96054000000
Ambrosia_trifida	-7827947.83699000000	4354095.90460000000
Ambrosia_trifida	-9618437.46800000000	4643912.73202000000
Ambrosia_trifida	-9874019.97576000000	5389382.33693000000
Ambrosia_trifida	-9900966.66410000000	5389851.55638000000
Ambrosia_trifida	-9876897.19663000000	5462686.68421000000
Ambrosia_trifida	-9590624.33285000000	4724133.59095000000
Ambrosia_trifida	-7908128.80426000000	4377754.56719000000
Ambrosia_trifida	-9579823.27270000000	4463035.78777000000
Ambrosia_trifida	-9635785.70119000000	4550552.37825000000
Ambrosia_trifida	-9640480.72359000000	4555637.36200000000
Ambrosia_trifida	-9640402.56970000000	4724103.98790000000
Ambrosia_trifida	-9975596.48621000000	5422349.11915000000
Ambrosia_trifida	-7921078.80685000000	4399677.34380000000
Ambrosia_trifida	-9645202.76214000000	4667277.84443000000
Ambrosia_trifida	-9638795.49421000000	4516589.12272000000
Ambrosia_trifida	-9806747.81144000000	5301963.89723000000
Ambrosia_trifida	-9591652.87660000000	4756913.91097000000
Ambrosia_trifida	-9588121.47874000000	4756207.16112000000
Ambrosia_trifida	-9923999.86893000000	5433569.46883000000
Ambrosia_trifida	-9637090.58164000000	4642808.88524000000
Ambrosia_trifida	-9633740.19205000000	4642405.18917000000
Ambrosia_trifida	-9649592.88789000000	4736980.61078000000
Ambrosia_trifida	-8088711.17557000000	4235227.13812000000
Ambrosia_trifida	-7625637.81672000000	4704516.58936000000
Ambrosia_trifida	-10009679.68580000000	5403915.65428000000
Ambrosia_trifida	-9674835.62853000000	4331603.83179000000
Ambrosia_trifida	-9612146.56253000000	4805095.66770000000
Ambrosia_trifida	-6879637.73829000000	5151608.49119000000
Ambrosia_trifida	-9675686.63752000000	4285728.76074000000
Ambrosia_trifida	-7958290.67055000000	4233941.20990000000
Ambrosia_trifida	-10702885.36630000000	3902307.45259000000
Ambrosia_trifida	-10708368.68160000000	3900858.87073000000
Ambrosia_trifida	-10702885.36630000000	3902307.45259000000
Ambrosia_trifida	-10708230.70620000000	3902199.11413000000
Ambrosia_trifida	-7789754.22539000000	4378833.30877000000
Ambrosia_trifida	-10719259.08800000000	3916489.67264000000
Ambrosia_trifida	-7719661.76710000000	4540219.37987000000
Ambrosia_trifida	-9638872.29729000000	4685809.15661000000
Ambrosia_trifida	-9973500.22528000000	5361659.41629000000
Ambrosia_trifida	-9846424.89960000000	5175186.95680000000
Ambrosia_trifida	-9694845.33927000000	4724376.29192000000
Ambrosia_trifida	-9635580.18541000000	4600268.54319000000
Ambrosia_trifida	-7840056.38273000000	4485080.25939000000
Ambrosia_trifida	-10413124.52340000000	5467827.05248000000
Ambrosia_trifida	-9650461.26441000000	4489067.30502000000
Ambrosia_trifida	-11260628.16870000000	5053835.56051000000
Ambrosia_trifida	-9674393.72137000000	4240261.12406000000
Ambrosia_trifida	-9695016.11999000000	4380706.89229000000
Ambrosia_trifida	-9905674.22972000000	5342169.83372000000
Ambrosia_trifida	-9637360.74323000000	4476566.87151000000
Ambrosia_trifida	-9652680.44886000000	4516205.10252000000
Ambrosia_trifida	-7753943.34247000000	4399485.22417000000
Ambrosia_trifida	-9630731.74983000000	4791640.98704000000
Ambrosia_trifida	-9696292.24753000000	4691283.81508000000
Ambrosia_trifida	-8022296.19536000000	4228842.01726000000
Ambrosia_trifida	-9708931.95025000000	4725984.60264000000
Ambrosia_trifida	-10088714.87850000000	5426895.85080000000
Ambrosia_trifida	-9681433.36037000000	4439640.40442000000
Ambrosia_trifida	-9683291.68613000000	4430573.38737000000
Ambrosia_trifida	-9691467.93352000000	4423220.46346000000
Ambrosia_trifida	-9726430.70203000000	4285709.01923000000
Ambrosia_trifida	-9888197.66978000000	5224987.79023000000
Ambrosia_trifida	-7941786.69231000000	4292905.66619000000
Ambrosia_trifida	-9672846.08143000000	4644170.56887000000
Ambrosia_trifida	-9696007.61301000000	4600234.71777000000
Ambrosia_trifida	-9693016.53832000000	4685918.96846000000
Ambrosia_trifida	-10272508.31320000000	5294637.14861000000
Ambrosia_trifida	-10322952.78780000000	5383190.39495000000
Ambrosia_trifida	-10513326.10440000000	5482698.33653000000
Ambrosia_trifida	-8055848.91338000000	4250201.49501000000
Ambrosia_trifida	-7837435.81536000000	4370384.43079000000
Ambrosia_trifida	-7739724.64178000000	4455736.90048000000
Ambrosia_trifida	-9701695.47923000000	4980417.74424000000
Ambrosia_trifida	-9698414.94570000000	4986231.76025000000
Ambrosia_trifida	-7827612.16122000000	4419563.39110000000
Ambrosia_trifida	-9730865.69390000000	4425598.74146000000
Ambrosia_trifida	-9689558.47003000000	4481902.86797000000
Ambrosia_trifida	-9682108.76434000000	4487638.96856000000
Ambrosia_trifida	-9682108.76434000000	4488368.36537000000
Ambrosia_trifida	-10297439.98210000000	5290240.32509000000
Ambrosia_trifida	-9726492.45325000000	4420226.67467000000
Ambrosia_trifida	-9691168.34362000000	4642965.39803000000
Ambrosia_trifida	-9920723.67728000000	5089151.96597000000
Ambrosia_trifida	-9727223.81926000000	4331857.60608000000
Ambrosia_trifida	-9693570.36957000000	4556244.41701000000
Ambrosia_trifida	-10623681.70850000000	5499095.68715000000
Ambrosia_trifida	-9713949.23682000000	4494909.54601000000
Ambrosia_trifida	-10349681.89960000000	5288217.34102000000
Ambrosia_trifida	-9986096.50917000000	5233468.39178000000
Ambrosia_trifida	-10656909.65370000000	4024684.41359000000
Ambrosia_trifida	-9755341.85105000000	4441994.94164000000
Ambrosia_trifida	-9737877.83432000000	4576476.24068000000
Ambrosia_trifida	-9737974.32060000000	4575575.21094000000
Ambrosia_trifida	-9910441.61682000000	5140576.83546000000
Ambrosia_trifida	-7823594.37603000000	4397954.65898000000
Ambrosia_trifida	-10445777.89280000000	5367973.83676000000
Ambrosia_trifida	-9720532.49572000000	4809672.90778000000
Ambrosia_trifida	-11215864.32380000000	5037310.16368000000
Ambrosia_trifida	-9732185.14379000000	4503740.29458000000
Ambrosia_trifida	-7676091.45752000000	4543066.41076000000
Ambrosia_trifida	-9982268.89843000000	5310370.50789000000
Ambrosia_trifida	-9720612.57933000000	4512473.28068000000
Ambrosia_trifida	-9746368.62698000000	4722975.44621000000
Ambrosia_trifida	-10788596.05870000000	3889543.65834000000
Ambrosia_trifida	-10367257.84040000000	5283863.12621000000
Ambrosia_trifida	-9736033.98151000000	4556284.97256000000
Ambrosia_trifida	-9749014.28079000000	4724380.21271000000
Ambrosia_trifida	-9759266.91293000000	4599782.00060000000
Ambrosia_trifida	-8047093.74831000000	4186204.70737000000
Ambrosia_trifida	-10466638.70910000000	5358812.40498000000
Ambrosia_trifida	-9732852.82885000000	4463445.87825000000
Ambrosia_trifida	-9791768.89535000000	4380598.02277000000
Ambrosia_trifida	-7882636.74307000000	4327183.11990000000
Ambrosia_trifida	-9775288.45976000000	4507264.35112000000
Ambrosia_trifida	-9988200.87494000000	5280238.43070000000
Ambrosia_trifida	-7896437.17573000000	4331984.28363000000
Ambrosia_trifida	-9759201.30226000000	4485825.30413000000
Ambrosia_trifida	-9759201.30226000000	4485825.30413000000
Ambrosia_trifida	-9752241.74686000000	4686369.43500000000
Ambrosia_trifida	-9774957.51182000000	4463469.15162000000
Ambrosia_trifida	-9756574.94571000000	4952313.50316000000
Ambrosia_trifida	-9775818.16944000000	4426755.34300000000
Ambrosia_trifida	-10585214.55830000000	3968410.52345000000
Ambrosia_trifida	-10589369.25750000000	3970144.06488000000
Ambrosia_trifida	-9779752.87995000000	4464932.08265000000
Ambrosia_trifida	-7869715.30042000000	4418878.58669000000
Ambrosia_trifida	-7693444.03260000000	4513696.22542000000
Ambrosia_trifida	-8006283.91121000000	4256516.29497000000
Ambrosia_trifida	-10591491.95570000000	5486668.60347000000
Ambrosia_trifida	-9791234.74730000000	4439202.03535000000
Ambrosia_trifida	-10032064.50280000000	5229813.20759000000
Ambrosia_trifida	-9750400.78864000000	4643760.00882000000
Ambrosia_trifida	-9779105.45701000000	4331888.19072000000
Ambrosia_trifida	-7924313.41291000000	4333628.02136000000
Ambrosia_trifida	-7971857.60642000000	4403434.67887000000
Ambrosia_trifida	-7677118.07155000000	4618425.22407000000
Ambrosia_trifida	-10086488.07160000000	5225502.58558000000
Ambrosia_trifida	-9820780.77604000000	4463034.46650000000
Ambrosia_trifida	-9779656.39367000000	4550672.93275000000
Ambrosia_trifida	-9778604.69322000000	4556286.07680000000
Ambrosia_trifida	-9987908.52151000000	5018384.34567000000
Ambrosia_trifida	-9824136.56887000000	4684563.05407000000
Ambrosia_trifida	-9815502.49408000000	4685513.42481000000
Ambrosia_trifida	-10371287.10750000000	5218957.93290000000
Ambrosia_trifida	-9821649.15256000000	4507050.42991000000
Ambrosia_trifida	-9823080.04410000000	4426257.02244000000
Ambrosia_trifida	-10495874.05200000000	5362184.83123000000
Ambrosia_trifida	-10792405.33710000000	4152748.13916000000
Ambrosia_trifida	-9831951.95757000000	4419501.04570000000
Ambrosia_trifida	-9831951.95757000000	4417293.08697000000
Ambrosia_trifida	-9817479.01553000000	4601240.73156000000
Ambrosia_trifida	-9817867.85524000000	4599028.57301000000
Ambrosia_trifida	-9976102.46026000000	5105000.52325000000
Ambrosia_trifida	-10634158.18880000000	3867862.31066000000
Ambrosia_trifida	-9814534.25426000000	4642983.44935000000
Ambrosia_trifida	-9951186.80811000000	4967978.94173000000
Ambrosia_trifida	-10237869.73860000000	5220260.57210000000
Ambrosia_trifida	-10714350.83090000000	3831511.52169000000
Ambrosia_trifida	-9822724.00972000000	4555372.71973000000
Ambrosia_trifida	-7863799.72658000000	4347783.96935000000
Ambrosia_trifida	-9977646.24075000000	4966876.58918000000
Ambrosia_trifida	-10699309.58470000000	3821233.24623000000
Ambrosia_trifida	-10708394.73290000000	3819930.41022000000
Ambrosia_trifida	-10192423.73570000000	5214706.31745000000
Ambrosia_trifida	-9845267.06424000000	4455598.54343000000
Ambrosia_trifida	-9819119.28229000000	4632737.36025000000
Ambrosia_trifida	-9819119.28229000000	4629856.29333000000
Ambrosia_trifida	-10742097.39050000000	3831980.60667000000
Ambrosia_trifida	-10741402.68930000000	3831696.97643000000
Ambrosia_trifida	-10741402.68930000000	3831696.97643000000
Ambrosia_trifida	-10741402.68930000000	3831696.97643000000
Ambrosia_trifida	-10741364.09480000000	3832002.42406000000
Ambrosia_trifida	-10741364.09480000000	3832002.42406000000
Ambrosia_trifida	-9879741.03326000000	4503273.22121000000
Ambrosia_trifida	-9866011.61449000000	4802277.26647000000
Ambrosia_trifida	-9866011.61449000000	4802277.26647000000
Ambrosia_trifida	-7904454.79968000000	4311156.56007000000
Ambrosia_trifida	-9875657.34793000000	4792724.35389000000
Ambrosia_trifida	-9948221.20580000000	4778354.81750000000
Ambrosia_trifida	-9882354.46064000000	4707114.92968000000
Ambrosia_trifida	-10006468.62240000000	4886453.64407000000
Ambrosia_trifida	-10016144.26660000000	4894518.98609000000
Ambrosia_trifida	-9907500.71500000000	4540459.01317000000
Ambrosia_trifida	-10827642.12660000000	5465580.88647000000
Ambrosia_trifida	-9955936.82769000000	4767640.52831000000
Ambrosia_trifida	-9899723.92081000000	4195880.49962000000
Ambrosia_trifida	-10271253.99150000000	5142609.09145000000
Ambrosia_trifida	-10088904.08810000000	5073309.37535000000
Ambrosia_trifida	-9936860.52522000000	4825820.46931000000
Ambrosia_trifida	-7927701.04621000000	4304402.47181000000
Ambrosia_trifida	-10312652.39500000000	5161371.35304000000
Ambrosia_trifida	-10799274.19540000000	4772674.49318000000
Ambrosia_trifida	-10006703.08400000000	4497198.84202000000
Ambrosia_trifida	-10396267.40540000000	3897874.37234000000
Ambrosia_trifida	-10588110.11160000000	3866396.94110000000
Ambrosia_trifida	-9895342.47883000000	4438828.89249000000
Ambrosia_trifida	-10687463.96410000000	3826546.64885000000
Ambrosia_trifida	-10013867.19040000000	4540725.59863000000
Ambrosia_trifida	-10007102.92320000000	4856999.51868000000
Ambrosia_trifida	-10012502.87430000000	4946434.02549000000
Ambrosia_trifida	-9940871.45989000000	4389080.27336000000
Ambrosia_trifida	-10070659.01490000000	4913764.82246000000
Ambrosia_trifida	-10068874.01870000000	4909264.84933000000
Ambrosia_trifida	-10088999.12710000000	5142744.44430000000
Ambrosia_trifida	-10164347.19300000000	5115553.03657000000
Ambrosia_trifida	-10774594.93460000000	4718610.57486000000
Ambrosia_trifida	-10284221.74760000000	5092172.12490000000
Ambrosia_trifida	-10072945.73970000000	4532819.53655000000
Ambrosia_trifida	-10317690.90850000000	4094831.29676000000
Ambrosia_trifida	-10675403.17900000000	3854703.53519000000
Ambrosia_trifida	-10183995.65910000000	5110643.81147000000
Ambrosia_trifida	-10127341.81000000000	4913073.53220000000
Ambrosia_trifida	-10005048.34430000000	4827318.86928000000
Ambrosia_trifida	-10006671.24360000000	4823925.49461000000
Ambrosia_trifida	-10669935.30150000000	3807246.30055000000
Ambrosia_trifida	-10066220.64600000000	4857047.92678000000
Ambrosia_trifida	-10538425.46640000000	5381430.89575000000
Ambrosia_trifida	-10108201.82660000000	4733575.04179000000
Ambrosia_trifida	-10694198.70640000000	3826422.76949000000
Ambrosia_trifida	-10099218.95390000000	4534984.34909000000
Ambrosia_trifida	-10649567.04780000000	3828347.37152000000
Ambrosia_trifida	-10126707.89510000000	4749277.13505000000
Ambrosia_trifida	-9983531.90384000000	4621524.42432000000
Ambrosia_trifida	-10036599.35800000000	4975690.81114000000
Ambrosia_trifida	-10139193.21980000000	4761102.62756000000
Ambrosia_trifida	-10139100.20700000000	4764166.01418000000
Ambrosia_trifida	-10141219.43170000000	4765974.99990000000
Ambrosia_trifida	-10139100.20700000000	4764166.01418000000
Ambrosia_trifida	-10138923.05820000000	4762476.99947000000
Ambrosia_trifida	-10138276.60010000000	4762574.46183000000
Ambrosia_trifida	-10138276.60010000000	4766686.06628000000
Ambrosia_trifida	-10136530.19840000000	4759757.22170000000
Ambrosia_trifida	-10139559.86760000000	4766199.04276000000
Ambrosia_trifida	-10141393.10700000000	4761970.17208000000
Ambrosia_trifida	-10135883.74040000000	4758967.39986000000
Ambrosia_trifida	-10143226.34630000000	4761970.17208000000
Ambrosia_trifida	-10133220.71900000000	4761931.18375000000
Ambrosia_trifida	-10014393.52300000000	5122004.06157000000
Ambrosia_trifida	-11634085.07040000000	4770886.61475000000
Ambrosia_trifida	-10068373.25490000000	4694355.63642000000
Ambrosia_trifida	-10663074.16220000000	3828487.05090000000
Ambrosia_trifida	-10663596.15290000000	3829231.24845000000
Ambrosia_trifida	-10083432.44760000000	4523195.72992000000
Ambrosia_trifida	-10038751.00200000000	4438752.42658000000
Ambrosia_trifida	-10457117.44290000000	3957161.81554000000
Ambrosia_trifida	-10006399.15230000000	4635140.66395000000
Ambrosia_trifida	-10003697.53640000000	4634256.89922000000
Ambrosia_trifida	-10142396.56430000000	4670854.90709000000
Ambrosia_trifida	-10146024.44840000000	4673709.30653000000
Ambrosia_trifida	-10621065.00060000000	4147449.94879000000
Ambrosia_trifida	-10113643.65280000000	4791534.83341000000
Ambrosia_trifida	-10105008.13070000000	4580149.28552000000
Ambrosia_trifida	-10607402.54330000000	4085658.74613000000
Ambrosia_trifida	-10151871.51700000000	4739269.59156000000
Ambrosia_trifida	-10451697.80860000000	4355982.03929000000
Ambrosia_trifida	-10149816.35920000000	4749443.14951000000
Ambrosia_trifida	-10100764.66410000000	4835116.54015000000
Ambrosia_trifida	-10644334.01790000000	4239257.61363000000
Ambrosia_trifida	-10153704.75630000000	4772605.40074000000
Ambrosia_trifida	-10161423.65870000000	4777430.39794000000
Ambrosia_trifida	-10594677.93270000000	4470392.75071000000
Ambrosia_trifida	-10148932.54490000000	4763621.11720000000
Ambrosia_trifida	-10151871.51700000000	4759805.97305000000
Ambrosia_trifida	-10152739.89350000000	4762087.13568000000
Ambrosia_trifida	-10147597.17480000000	4760966.14955000000
Ambrosia_trifida	-10160391.25550000000	4881253.18665000000
Ambrosia_trifida	-10084851.18190000000	4591936.70802000000
Ambrosia_trifida	-10419591.99880000000	4758908.89080000000
Ambrosia_trifida	-10564134.23580000000	4238847.02431000000
Ambrosia_trifida	-10784094.58780000000	4285935.52429000000
Ambrosia_trifida	-10294805.32770000000	4355626.40053000000
Ambrosia_trifida	-10599693.28950000000	4100909.76600000000
[truncated: 10 more rows]
